# Supplementary material for: Molecular Signatures of Nicotinoid-Pathogen Synergy in the Termite Gut
Source: PLoS One. 2015 Apr 2;10(4):e0123391. doi: 10.1371/journal.pone.0123391 (PMC4383478; doi:10.1371/journal.pone.0123391)
Supplement: S12 Table — (XLSX) [file pone.0123391.s017.xlsx]

## Sheet: Sheet1
S12 Table. BLAST2GO summary for the top 20 Biological Process (BP) terms from each treatment category.
	Fungi (F)		Bacteria (B)		Imidacloprid (I)		F+I		B+I
Biological Process	UP	DOWN	UP	DOWN	UP	DOWN	UP	DOWN	UP	DOWN	TOTALS
P: GTP catabolic process	2	1					3	45			51
P: microtubule-based movement								36	24		60
P: protein polymerization								30	21		51
P: oxidationreduction process	2						23	20	13		58
P: proteolysis	3						12	20			35
P: translation	3		7		4	13		18	13	24	82
P: protein phosphorylation							6	17	9		32
P: carbohydrate metabolic process	2		5	5	10	17	10	13	8	26	96
P: phosphorylation							6	12	15		33
P: glycolysis								11	11		22
P: metabolic process	2		9	7	18	28	4	10	17	32	127
P: translational elongation								10	7		17
P: small GTPase mediated signal transduction								10			10
P: intracellular protein transport							3	9			12
P: protein transport								9	7	9	25
P: ATP catabolic process	1							9	7		17
P: protein folding								9	6		15
P: transmembrane transport								8	6		14
P: signal transduction		1	6		5	10	5	7	10	16	60
P: cellular process								7	8		15
P: serine family amino acid metabolic process							6				6
P: regulation of transcription, DNAdependent							5				5
P: regulation of translational elongation							5				5
P: RNAdependent DNA replication							5				5
P: ribosome biogenesis	2						4				6
P: brain development							3				3
P: cell adhesion							3				3
P: chitin catabolic process							3				3
P: glucose metabolic process							3				3
P: ion transport							3				3
P: catabolic process			9	4	9	39				48	109
P: nucleobase containing compound metabolic process				3		28				38	69
P: cellular component organization			4	3	7	23				23	60
P: regulation of biological process			10	2	13	13				21	59
P: biosynthetic process			3	1	7	16				23	50
P: response to stress	3		4		7	11				14	39
P: generation of precursor metabolites and energy				2		15				22	39
P: protein metabolic process			8		3	10				16	37
P: transport		1		2	6	9				18	36
P: multicellular organismal development			6	2	7	7				8	30
P: GTP biosynthetic process									29		29
P: cell cycle			8		3	7				7	25
P: cell death					5	5				7	17
P: lipid metabolic process		1		2	4					9	16
P: 7-methylguanosine mRNA capping		1		1		7				7	16
P: nucleobasecontaining compound metabolic process			6		8						14
P: anatomical structure morphogenesis			3		7						10
P: toll-like receptor 3 signaling pathway									9		9
P: cell differentiation			2	1	5						8
P: cellular protein modification process			8								8
P: embryo development			2			6					8
P: toll-like receptor 1 signaling pathway									8		8
P: DNA metabolic process				1		6					7
P: cell proliferation					4						4
P: intracellular signal transduction		3									3
P: cell surface receptor signaling pathway			2								2
P: Gprotein coupled receptor signaling pathway			2								2
P: mitosis	2										2
P: methionine biosynthetic process				2							2
P: methylation				2							2
P: polysaccharide catabolic process				2							2
P: secondary metabolic process				2							2
P: angiotensin catabolic process in blood	1										1
P: antiapoptosis	1										1
P: apical protein localization	1										1
P: arachidonic acid secretion	1										1
P: asymmetric neuroblast division	1										1
P: ATP biosynthetic process	1										1
P: ATPdependent proteolysis	1										1
P: autophagic cell death	1										1
P: blood vessel remodeling	1										1
P: cell division				1							1
P: cyclic nucleotide biosynthetic process		1									1
P: negative regulation of innate immune response		1									1
P: negative regulation of peptidoglycan recognition protein signaling pathway		1									1
P: nuclear mRNA splicing, via spliceosome		1									1
P: negative regulation of immune response		1									1
P: positive regulation of viral transcription		1									1
P: purine nucleobase metabolic process		1									1
P: pyrimidine nucleobase metabolic process		1									1
P: response to symbiotic bacterium		1									1
P: termination of RNA polymerase III transcription		1									1
P: transcription elongation from RNA polymerase II promoter		1									1
P: transcription elongation from RNA polymerase III promoter		1									1
P: transcription initiation from RNA polymerase II promoter		1									1
P: transcription-coupled nucleotide-excision repair		1									1
TOTALS	31	22	104	45	132	270	112	310	228	368	1622
