# Supplementary material for: Molecular Signatures of Nicotinoid-Pathogen Synergy in the Termite Gut
Source: PLoS One. 2015 Apr 2;10(4):e0123391. doi: 10.1371/journal.pone.0123391 (PMC4383478; doi:10.1371/journal.pone.0123391)
Supplement: S19 Table — (XLSX) [file pone.0123391.s024.xlsx]

## Sheet: Group-FI
Probe Name	GeneName	Mean Log2FC	Std Log2FC	P-value	Q-value
(-)3xSLv1	NegativeControl	0.075057	0.107632	0.193933	0.432284
(-)3xSLv1	NegativeControl	0.135536	0.200803	0.205732	0.447651
(-)3xSLv1	NegativeControl	0.087124	0.159909	0.290057	0.538467
(-)3xSLv1	NegativeControl	-0.011468	0.025242	0.367136	0.538467
(-)3xSLv1	NegativeControl	-0.024803	0.055059	0.370778	0.538467
(-)3xSLv1	NegativeControl	-0.02511	0.055746	0.370816	0.538467
(-)3xSLv1	NegativeControl	-0.031032	0.068987	0.371406	0.538467
(-)3xSLv1	NegativeControl	-0.000144	0.000322	0.373901	0.538467
(-)3xSLv1	NegativeControl	-0.000144	0.000322	0.373901	0.538467
(-)3xSLv1	NegativeControl	-0.000144	0.000322	0.373901	0.538467
(-)3xSLv1	NegativeControl	-0.000144	0.000322	0.373901	0.538467
(-)3xSLv1	NegativeControl	-0.000144	0.000322	0.373901	0.538467
(-)3xSLv1	NegativeControl	-0.000144	0.000322	0.373901	0.538467
(-)3xSLv1	NegativeControl	-0.000144	0.000322	0.373901	0.538467
(-)3xSLv1	NegativeControl	-0.000144	0.000322	0.373901	0.538467
(-)3xSLv1	NegativeControl	-0.000144	0.000322	0.373901	0.538467
(-)3xSLv1	NegativeControl	-0.000144	0.000322	0.373901	0.538467
(-)3xSLv1	NegativeControl	-0.000144	0.000322	0.373901	0.538467
(-)3xSLv1	NegativeControl	-0.000144	0.000322	0.373901	0.538467
(-)3xSLv1	NegativeControl	-0.000144	0.000322	0.373901	0.538467
(-)3xSLv1	NegativeControl	-0.000144	0.000322	0.373901	0.538467
(-)3xSLv1	NegativeControl	-0.000144	0.000322	0.373901	0.538467
(-)3xSLv1	NegativeControl	-0.000144	0.000322	0.373901	0.538467
(-)3xSLv1	NegativeControl	-0.000144	0.000322	0.373901	0.538467
(-)3xSLv1	NegativeControl	-0.000144	0.000322	0.373901	0.538467
(-)3xSLv1	NegativeControl	-0.000144	0.000322	0.373901	0.538467
(-)3xSLv1	NegativeControl	-0.000144	0.000322	0.373901	0.538467
(-)3xSLv1	NegativeControl	-0.000144	0.000322	0.373901	0.538467
(-)3xSLv1	NegativeControl	-0.000144	0.000322	0.373901	0.538467
(-)3xSLv1	NegativeControl	-0.000144	0.000322	0.373901	0.538467
(-)3xSLv1	NegativeControl	-0.000144	0.000322	0.373901	0.538467
(-)3xSLv1	NegativeControl	-0.000144	0.000322	0.373901	0.538467
(-)3xSLv1	NegativeControl	-0.000144	0.000322	0.373901	0.538467
(-)3xSLv1	NegativeControl	-0.000144	0.000322	0.373901	0.538467
(-)3xSLv1	NegativeControl	-0.000144	0.000322	0.373901	0.538467
(-)3xSLv1	NegativeControl	-0.000144	0.000322	0.373901	0.538467
(-)3xSLv1	NegativeControl	-0.000144	0.000322	0.373901	0.538467
(-)3xSLv1	NegativeControl	-0.000144	0.000322	0.373901	0.538467
(-)3xSLv1	NegativeControl	-0.000144	0.000322	0.373901	0.538467
(-)3xSLv1	NegativeControl	-0.000144	0.000322	0.373901	0.538467
(-)3xSLv1	NegativeControl	-0.000144	0.000322	0.373901	0.538467
(-)3xSLv1	NegativeControl	-0.000144	0.000322	0.373901	0.538467
(-)3xSLv1	NegativeControl	-0.000144	0.000322	0.373901	0.538467
(-)3xSLv1	NegativeControl	-0.000144	0.000322	0.373901	0.538467
(-)3xSLv1	NegativeControl	-0.000144	0.000322	0.373901	0.538467
(-)3xSLv1	NegativeControl	-0.000144	0.000322	0.373901	0.538467
(-)3xSLv1	NegativeControl	-0.000144	0.000322	0.373901	0.538467
(-)3xSLv1	NegativeControl	-0.000144	0.000322	0.373901	0.538467
(-)3xSLv1	NegativeControl	-0.000144	0.000322	0.373901	0.538467
(-)3xSLv1	NegativeControl	-0.000144	0.000322	0.373901	0.538467
(-)3xSLv1	NegativeControl	-0.000144	0.000322	0.373901	0.538467
(-)3xSLv1	NegativeControl	-0.000144	0.000322	0.373901	0.538467
(-)3xSLv1	NegativeControl	-0.000144	0.000322	0.373901	0.538467
(-)3xSLv1	NegativeControl	-0.000144	0.000322	0.373901	0.538467
(-)3xSLv1	NegativeControl	-0.000144	0.000322	0.373901	0.538467
(-)3xSLv1	NegativeControl	-0.000144	0.000322	0.373901	0.538467
(-)3xSLv1	NegativeControl	-0.000144	0.000322	0.373901	0.538467
(-)3xSLv1	NegativeControl	-0.000144	0.000322	0.373901	0.538467
(-)3xSLv1	NegativeControl	-0.000144	0.000322	0.373901	0.538467
(-)3xSLv1	NegativeControl	-0.000144	0.000322	0.373901	0.538467
(-)3xSLv1	NegativeControl	-0.000144	0.000322	0.373901	0.538467
(-)3xSLv1	NegativeControl	-0.000144	0.000322	0.373901	0.538467
(-)3xSLv1	NegativeControl	-0.000144	0.000322	0.373901	0.538467
(-)3xSLv1	NegativeControl	-0.000144	0.000322	0.373901	0.538467
(-)3xSLv1	NegativeControl	-0.000144	0.000322	0.373901	0.538467
(-)3xSLv1	NegativeControl	-0.000144	0.000322	0.373901	0.538467
(-)3xSLv1	NegativeControl	0.064783	0.145262	0.375094	0.538467
(-)3xSLv1	NegativeControl	0.040206	0.090307	0.375823	0.538467
(-)3xSLv1	NegativeControl	0.033173	0.074581	0.37623	0.538467
(-)3xSLv1	NegativeControl	0.029832	0.06711	0.376491	0.538467
(-)3xSLv1	NegativeControl	0.028486	0.064101	0.376613	0.538467
(-)3xSLv1	NegativeControl	0.012332	0.02798	0.380154	0.539732
(-)3xSLv1	NegativeControl	0.011832	0.026862	0.380417	0.539938
(-)3xSLv1	NegativeControl	0.009825	0.022374	0.381743	0.540732
(-)3xSLv1	NegativeControl	0.006118	0.014087	0.386464	0.544575
(-)3xSLv1	NegativeControl	0.005215	0.012069	0.38862	0.54599
(-)3xSLv1	NegativeControl	0.004699	0.010914	0.390225	0.547511
(+)E1A_r60_1	E1A_r60_1	-0.129945	0.085829	0.027646	0.12207
(+)E1A_r60_1	E1A_r60_1	-0.135062	0.102322	0.041905	0.159561
(+)E1A_r60_1	E1A_r60_1	-0.13016	0.100546	0.044356	0.165403
(+)E1A_r60_1	E1A_r60_1	-0.125039	0.099068	0.047719	0.173476
(+)E1A_r60_1	E1A_r60_1	-0.122064	0.098245	0.049911	0.178476
(+)E1A_r60_1	E1A_r60_1	-0.143061	0.116345	0.051399	0.181693
(+)E1A_r60_1	E1A_r60_1	-0.105116	0.085557	0.05152	0.18196
(+)E1A_r60_1	E1A_r60_1	-0.119663	0.097589	0.051807	0.182399
(+)E1A_r60_1	E1A_r60_1	-0.133168	0.108761	0.05202	0.182755
(+)E1A_r60_1	E1A_r60_1	-0.135051	0.11065	0.052488	0.183836
(+)E1A_r60_1	E1A_r60_1	-0.129298	0.108302	0.055831	0.192054
(+)E1A_r60_1	E1A_r60_1	-0.127922	0.10733	0.056094	0.192662
(+)E1A_r60_1	E1A_r60_1	-0.117086	0.09876	0.056923	0.194619
(+)E1A_r60_1	E1A_r60_1	-0.131984	0.112946	0.059235	0.200089
(+)E1A_r60_1	E1A_r60_1	-0.098797	0.08547	0.061022	0.203558
(+)E1A_r60_1	E1A_r60_1	-0.123571	0.10957	0.065232	0.213164
(+)E1A_r60_1	E1A_r60_1	-0.121997	0.109838	0.067949	0.219222
(+)E1A_r60_1	E1A_r60_1	-0.109623	0.106271	0.08234	0.248807
(+)E1A_r60_1	E1A_r60_1	-0.115888	0.112359	0.082367	0.248807
(+)E1A_r60_1	E1A_r60_1	-0.110829	0.11122	0.08979	0.263993
(+)E1A_r60_3	E1A_r60_3	0.076482	0.497145	0.748168	0.835931
(+)E1A_r60_3	E1A_r60_3	0.070349	0.496423	0.767185	0.849364
(+)E1A_r60_3	E1A_r60_3	0.067193	0.506819	0.78164	0.859232
(+)E1A_r60_3	E1A_r60_3	0.064543	0.502946	0.788397	0.863916
(+)E1A_r60_3	E1A_r60_3	0.063019	0.509104	0.795656	0.869208
(+)E1A_r60_3	E1A_r60_3	0.056073	0.482503	0.807799	0.877843
(+)E1A_r60_3	E1A_r60_3	0.057091	0.501359	0.811566	0.880417
(+)E1A_r60_3	E1A_r60_3	0.058262	0.516637	0.813341	0.881568
(+)E1A_r60_3	E1A_r60_3	0.052445	0.490209	0.822689	0.887529
(+)E1A_r60_3	E1A_r60_3	0.050924	0.477016	0.823061	0.887687
(+)E1A_r60_3	E1A_r60_3	0.053271	0.507114	0.825826	0.889512
(+)E1A_r60_3	E1A_r60_3	0.05152	0.513576	0.833505	0.895089
(+)E1A_r60_3	E1A_r60_3	0.04863	0.495083	0.836905	0.897393
(+)E1A_r60_3	E1A_r60_3	0.04808	0.50581	0.842071	0.900295
(+)E1A_r60_3	E1A_r60_3	0.046181	0.507185	0.848603	0.904269
(+)E1A_r60_3	E1A_r60_3	0.043432	0.509106	0.858004	0.909668
(+)E1A_r60_3	E1A_r60_3	0.042097	0.508909	0.862253	0.912423
(+)E1A_r60_3	E1A_r60_3	0.034494	0.46085	0.875202	0.920524
(+)E1A_r60_3	E1A_r60_3	0.03475	0.493234	0.882453	0.925306
(+)E1A_r60_3	E1A_r60_3	0.028801	0.478663	0.89947	0.937901
(+)E1A_r60_a104	E1A_r60_a104	0.041133	0.452048	0.848701	0.904273
(+)E1A_r60_a104	E1A_r60_a104	0.036951	0.454133	0.864478	0.913972
(+)E1A_r60_a104	E1A_r60_a104	0.036146	0.45091	0.866454	0.915054
(+)E1A_r60_a104	E1A_r60_a104	0.02572	0.446589	0.903747	0.941229
(+)E1A_r60_a104	E1A_r60_a104	0.025999	0.452689	0.904011	0.941264
(+)E1A_r60_a104	E1A_r60_a104	0.025744	0.450132	0.904412	0.941406
(+)E1A_r60_a104	E1A_r60_a104	0.023547	0.440572	0.910633	0.945363
(+)E1A_r60_a104	E1A_r60_a104	0.021563	0.447501	0.919386	0.950209
(+)E1A_r60_a104	E1A_r60_a104	0.020122	0.44399	0.924158	0.953226
(+)E1A_r60_a104	E1A_r60_a104	0.020696	0.459123	0.924562	0.953393
(+)E1A_r60_a104	E1A_r60_a104	0.015164	0.449785	0.943526	0.965663
(+)E1A_r60_a104	E1A_r60_a104	0.013694	0.447126	0.948688	0.968675
(+)E1A_r60_a104	E1A_r60_a104	0.013041	0.456786	0.952161	0.970472
(+)E1A_r60_a104	E1A_r60_a104	0.008873	0.435145	0.96582	0.979361
(+)E1A_r60_a104	E1A_r60_a104	0.004845	0.4648	0.982521	0.989562
(+)E1A_r60_a104	E1A_r60_a104	0.00436	0.470974	0.984477	0.990835
(+)E1A_r60_a104	E1A_r60_a104	-0.00288	0.449106	0.989245	0.993917
(+)E1A_r60_a104	E1A_r60_a104	0.001097	0.431591	0.995736	0.997631
(+)E1A_r60_a104	E1A_r60_a104	-0.000653	0.45143	0.997573	0.998465
(+)E1A_r60_a104	E1A_r60_a104	0.000248	0.464313	0.999105	0.999557
(+)E1A_r60_a107	E1A_r60_a107	-0.315782	0.534072	0.256662	0.511537
(+)E1A_r60_a107	E1A_r60_a107	-0.315605	0.54556	0.265461	0.520765
(+)E1A_r60_a107	E1A_r60_a107	-0.301842	0.522995	0.266411	0.521655
(+)E1A_r60_a107	E1A_r60_a107	-0.316683	0.552353	0.269099	0.524438
(+)E1A_r60_a107	E1A_r60_a107	-0.298585	0.526936	0.273885	0.530155
(+)E1A_r60_a107	E1A_r60_a107	-0.299634	0.531364	0.275875	0.532566
(+)E1A_r60_a107	E1A_r60_a107	-0.301818	0.542266	0.281232	0.538467
(+)E1A_r60_a107	E1A_r60_a107	-0.303046	0.551991	0.286894	0.538467
(+)E1A_r60_a107	E1A_r60_a107	-0.296272	0.544485	0.290593	0.538467
(+)E1A_r60_a107	E1A_r60_a107	-0.289672	0.538132	0.295083	0.538467
(+)E1A_r60_a107	E1A_r60_a107	-0.274074	0.515544	0.300291	0.538467
(+)E1A_r60_a107	E1A_r60_a107	-0.286532	0.539562	0.300745	0.538467
(+)E1A_r60_a107	E1A_r60_a107	-0.282718	0.534065	0.302068	0.538467
(+)E1A_r60_a107	E1A_r60_a107	-0.287347	0.543312	0.302455	0.538467
(+)E1A_r60_a107	E1A_r60_a107	-0.28422	0.537735	0.302718	0.538467
(+)E1A_r60_a107	E1A_r60_a107	-0.283509	0.537315	0.303439	0.538467
(+)E1A_r60_a107	E1A_r60_a107	-0.295199	0.574076	0.314286	0.538467
(+)E1A_r60_a107	E1A_r60_a107	-0.273574	0.53643	0.317775	0.538467
(+)E1A_r60_a107	E1A_r60_a107	-0.27399	0.563985	0.338427	0.538467
(+)E1A_r60_a107	E1A_r60_a107	-0.258654	0.532659	0.338621	0.538467
(+)E1A_r60_a135	E1A_r60_a135	-0.248141	0.544241	0.365605	0.538467
(+)E1A_r60_a135	E1A_r60_a135	-0.256409	0.568902	0.370558	0.538467
(+)E1A_r60_a135	E1A_r60_a135	-0.249835	0.558195	0.373552	0.538467
(+)E1A_r60_a135	E1A_r60_a135	-0.229795	0.521131	0.379953	0.539612
(+)E1A_r60_a135	E1A_r60_a135	-0.234674	0.536036	0.383038	0.54189
(+)E1A_r60_a135	E1A_r60_a135	-0.245951	0.564555	0.385142	0.54343
(+)E1A_r60_a135	E1A_r60_a135	-0.237828	0.554994	0.39222	0.54942
(+)E1A_r60_a135	E1A_r60_a135	-0.233914	0.54701	0.393123	0.550351
(+)E1A_r60_a135	E1A_r60_a135	-0.22852	0.54006	0.39764	0.554505
(+)E1A_r60_a135	E1A_r60_a135	-0.23604	0.562734	0.401385	0.557505
(+)E1A_r60_a135	E1A_r60_a135	-0.24544	0.586275	0.402212	0.558161
(+)E1A_r60_a135	E1A_r60_a135	-0.231794	0.555504	0.403619	0.559276
(+)E1A_r60_a135	E1A_r60_a135	-0.231774	0.57104	0.415435	0.570276
(+)E1A_r60_a135	E1A_r60_a135	-0.23273	0.575192	0.416767	0.571454
(+)E1A_r60_a135	E1A_r60_a135	-0.229835	0.568963	0.417462	0.572011
(+)E1A_r60_a135	E1A_r60_a135	-0.230315	0.570762	0.417918	0.572586
(+)E1A_r60_a135	E1A_r60_a135	-0.224545	0.557319	0.418572	0.573223
(+)E1A_r60_a135	E1A_r60_a135	-0.220056	0.54962	0.421246	0.575344
(+)E1A_r60_a135	E1A_r60_a135	-0.213493	0.538772	0.42564	0.579211
(+)E1A_r60_a135	E1A_r60_a135	-0.21191	0.571535	0.453669	0.603143
(+)E1A_r60_a20	E1A_r60_a20	-0.165881	0.143934	0.06152	0.204733
(+)E1A_r60_a20	E1A_r60_a20	-0.16602	0.146246	0.064089	0.210217
(+)E1A_r60_a20	E1A_r60_a20	-0.145098	0.128188	0.064593	0.211473
(+)E1A_r60_a20	E1A_r60_a20	-0.149145	0.133758	0.067247	0.217715
(+)E1A_r60_a20	E1A_r60_a20	-0.153761	0.140778	0.071034	0.225134
(+)E1A_r60_a20	E1A_r60_a20	-0.142105	0.132018	0.0738	0.230998
(+)E1A_r60_a20	E1A_r60_a20	-0.141716	0.131727	0.073904	0.231138
(+)E1A_r60_a20	E1A_r60_a20	-0.14145	0.133479	0.076855	0.237956
(+)E1A_r60_a20	E1A_r60_a20	-0.158185	0.151771	0.080203	0.24451
(+)E1A_r60_a20	E1A_r60_a20	-0.160534	0.155872	0.082671	0.249582
(+)E1A_r60_a20	E1A_r60_a20	-0.168061	0.163709	0.083349	0.250717
(+)E1A_r60_a20	E1A_r60_a20	-0.1482	0.149071	0.09031	0.26528
(+)E1A_r60_a20	E1A_r60_a20	-0.136319	0.140601	0.096028	0.276019
(+)E1A_r60_a20	E1A_r60_a20	-0.118975	0.127791	0.105806	0.294256
(+)E1A_r60_a20	E1A_r60_a20	-0.142132	0.153542	0.107242	0.296887
(+)E1A_r60_a20	E1A_r60_a20	-0.127064	0.140684	0.113551	0.308227
(+)E1A_r60_a20	E1A_r60_a20	-0.135246	0.151304	0.116281	0.312939
(+)E1A_r60_a20	E1A_r60_a20	-0.1312	0.147751	0.118045	0.31628
(+)E1A_r60_a20	E1A_r60_a20	-0.130596	0.149567	0.122611	0.325687
(+)E1A_r60_a20	E1A_r60_a20	-0.129288	0.174754	0.173407	0.408745
(+)E1A_r60_a22	E1A_r60_a22	0.174101	0.914522	0.692239	0.796298
(+)E1A_r60_a22	E1A_r60_a22	0.161281	0.919016	0.714764	0.812578
(+)E1A_r60_a22	E1A_r60_a22	0.158996	0.910212	0.716005	0.813411
(+)E1A_r60_a22	E1A_r60_a22	0.156962	0.904258	0.717685	0.813971
(+)E1A_r60_a22	E1A_r60_a22	0.158301	0.933653	0.723862	0.818851
(+)E1A_r60_a22	E1A_r60_a22	0.153859	0.922843	0.728209	0.822172
(+)E1A_r60_a22	E1A_r60_a22	0.151091	0.910568	0.729428	0.822959
(+)E1A_r60_a22	E1A_r60_a22	0.152836	0.929289	0.731688	0.824091
(+)E1A_r60_a22	E1A_r60_a22	0.148851	0.906085	0.731976	0.824326
(+)E1A_r60_a22	E1A_r60_a22	0.150743	0.917691	0.732001	0.824326
(+)E1A_r60_a22	E1A_r60_a22	0.149173	0.910391	0.73263	0.824693
(+)E1A_r60_a22	E1A_r60_a22	0.148861	0.91656	0.734859	0.826421
(+)E1A_r60_a22	E1A_r60_a22	0.150745	0.932428	0.73601	0.827242
(+)E1A_r60_a22	E1A_r60_a22	0.145308	0.922289	0.742395	0.832453
(+)E1A_r60_a22	E1A_r60_a22	0.140583	0.927228	0.751642	0.837932
(+)E1A_r60_a22	E1A_r60_a22	0.135265	0.903762	0.754687	0.839959
(+)E1A_r60_a22	E1A_r60_a22	0.135546	0.91037	0.755905	0.840897
(+)E1A_r60_a22	E1A_r60_a22	0.138896	0.940805	0.757874	0.84279
(+)E1A_r60_a22	E1A_r60_a22	0.133101	0.914464	0.761145	0.845115
(+)E1A_r60_a22	E1A_r60_a22	0.136741	0.944724	0.762416	0.846143
(+)E1A_r60_a97	E1A_r60_a97	0.187909	0.480931	0.431609	0.583925
(+)E1A_r60_a97	E1A_r60_a97	0.183843	0.471515	0.432501	0.584864
(+)E1A_r60_a97	E1A_r60_a97	0.189312	0.496273	0.441733	0.593183
(+)E1A_r60_a97	E1A_r60_a97	0.195773	0.513707	0.442141	0.593378
(+)E1A_r60_a97	E1A_r60_a97	0.180782	0.479092	0.446305	0.597084
(+)E1A_r60_a97	E1A_r60_a97	0.190677	0.510551	0.450632	0.600474
(+)E1A_r60_a97	E1A_r60_a97	0.179981	0.484655	0.453009	0.602825
(+)E1A_r60_a97	E1A_r60_a97	0.187624	0.506242	0.453841	0.60332
(+)E1A_r60_a97	E1A_r60_a97	0.192442	0.522385	0.456362	0.605479
(+)E1A_r60_a97	E1A_r60_a97	0.187479	0.511872	0.458782	0.607784
(+)E1A_r60_a97	E1A_r60_a97	0.18544	0.509189	0.461148	0.609915
(+)E1A_r60_a97	E1A_r60_a97	0.172427	0.47392	0.461555	0.610178
(+)E1A_r60_a97	E1A_r60_a97	0.184931	0.513979	0.466181	0.614792
(+)E1A_r60_a97	E1A_r60_a97	0.191509	0.534255	0.467731	0.616165
(+)E1A_r60_a97	E1A_r60_a97	0.184679	0.515376	0.467872	0.616217
(+)E1A_r60_a97	E1A_r60_a97	0.17209	0.495161	0.480479	0.626381
(+)E1A_r60_a97	E1A_r60_a97	0.180559	0.530985	0.489389	0.634187
(+)E1A_r60_a97	E1A_r60_a97	0.165073	0.488464	0.49191	0.636554
(+)E1A_r60_a97	E1A_r60_a97	0.168607	0.507719	0.498982	0.642808
(+)E1A_r60_a97	E1A_r60_a97	0.166971	0.508425	0.503466	0.646975
(+)E1A_r60_n11	E1A_r60_n11	-0.139111	0.508385	0.573696	0.706229
(+)E1A_r60_n11	E1A_r60_n11	-0.130813	0.514754	0.600249	0.728154
(+)E1A_r60_n11	E1A_r60_n11	-0.134317	0.550683	0.614467	0.738853
(+)E1A_r60_n11	E1A_r60_n11	-0.125494	0.527675	0.623033	0.745728
(+)E1A_r60_n11	E1A_r60_n11	-0.121671	0.52528	0.631828	0.752484
(+)E1A_r60_n11	E1A_r60_n11	-0.122348	0.550552	0.645318	0.761523
(+)E1A_r60_n11	E1A_r60_n11	-0.113677	0.529087	0.656014	0.769185
(+)E1A_r60_n11	E1A_r60_n11	-0.111585	0.535896	0.665725	0.776591
(+)E1A_r60_n11	E1A_r60_n11	-0.111077	0.536822	0.667646	0.777729
(+)E1A_r60_n11	E1A_r60_n11	-0.110594	0.535119	0.668004	0.777855
(+)E1A_r60_n11	E1A_r60_n11	-0.105443	0.514337	0.670458	0.779894
(+)E1A_r60_n11	E1A_r60_n11	-0.103577	0.529601	0.684454	0.790146
(+)E1A_r60_n11	E1A_r60_n11	-0.097743	0.506956	0.688597	0.793383
(+)E1A_r60_n11	E1A_r60_n11	-0.09497	0.51061	0.698833	0.800373
(+)E1A_r60_n11	E1A_r60_n11	-0.097263	0.533579	0.70444	0.804629
(+)E1A_r60_n11	E1A_r60_n11	-0.096759	0.539196	0.708739	0.808015
(+)E1A_r60_n11	E1A_r60_n11	-0.095112	0.531194	0.709342	0.808585
(+)E1A_r60_n11	E1A_r60_n11	-0.096858	0.549364	0.71352	0.811779
(+)E1A_r60_n11	E1A_r60_n11	-0.092961	0.551612	0.725434	0.819982
(+)E1A_r60_n11	E1A_r60_n11	-0.083947	0.52293	0.737771	0.828668
(+)E1A_r60_n9	E1A_r60_n9	-0.474329	1.03548	0.363598	0.538467
(+)E1A_r60_n9	E1A_r60_n9	-0.468501	1.03115	0.367107	0.538467
(+)E1A_r60_n9	E1A_r60_n9	-0.449926	1.00457	0.373263	0.538467
(+)E1A_r60_n9	E1A_r60_n9	-0.467237	1.04767	0.375091	0.538467
(+)E1A_r60_n9	E1A_r60_n9	-0.451864	1.01802	0.377125	0.538467
(+)E1A_r60_n9	E1A_r60_n9	-0.456826	1.03138	0.378035	0.538572
(+)E1A_r60_n9	E1A_r60_n9	-0.440949	1.00705	0.382971	0.54189
(+)E1A_r60_n9	E1A_r60_n9	-0.444978	1.01892	0.384099	0.542982
(+)E1A_r60_n9	E1A_r60_n9	-0.443942	1.0184	0.384878	0.543253
(+)E1A_r60_n9	E1A_r60_n9	-0.451531	1.03689	0.385325	0.543543
(+)E1A_r60_n9	E1A_r60_n9	-0.450019	1.03554	0.386208	0.544301
(+)E1A_r60_n9	E1A_r60_n9	-0.451344	1.04048	0.386989	0.544914
(+)E1A_r60_n9	E1A_r60_n9	-0.454336	1.04976	0.387962	0.545574
(+)E1A_r60_n9	E1A_r60_n9	-0.437364	1.01206	0.388606	0.54599
(+)E1A_r60_n9	E1A_r60_n9	-0.447873	1.03757	0.389099	0.546467
(+)E1A_r60_n9	E1A_r60_n9	-0.437991	1.01654	0.389885	0.547263
(+)E1A_r60_n9	E1A_r60_n9	-0.4358	1.02666	0.396278	0.553194
(+)E1A_r60_n9	E1A_r60_n9	-0.429058	1.01534	0.398208	0.554904
(+)E1A_r60_n9	E1A_r60_n9	-0.433449	1.0406	0.404367	0.559901
(+)E1A_r60_n9	E1A_r60_n9	-0.43275	1.05643	0.411507	0.56661
(+)eQC-39	EQC	0.192368	0.290232	0.212451	0.455985
(+)eQC-39	EQC	0.098289	0.207276	0.348774	0.538467
(+)eQC-39	EQC	0.09025	0.234674	0.438308	0.589996
(+)eQC-39	EQC	0.096737	0.333205	0.551611	0.687849
(+)eQC-39	EQC	0.092733	0.382429	0.616466	0.74047
(+)eQC-39	EQC	-0.006943	0.137519	0.915555	0.948692
(+)eQC-40	EQC	-0.0936	0.104496	0.115732	0.31178
(+)eQC-40	EQC	-0.059995	0.083051	0.181548	0.417502
(+)eQC-40	EQC	-0.083974	0.129071	0.219415	0.465034
(+)eQC-40	EQC	0.058084	0.09727	0.252715	0.507018
(+)eQC-40	EQC	0.020929	0.064121	0.505936	0.648846
(+)eQC-40	EQC	0.006932	0.253259	0.954132	0.971851
(+)eQC-41	EQC	0.120967	0.115095	0.078502	0.241253
(+)eQC-41	EQC	0.118255	0.252101	0.35342	0.538467
(+)eQC-41	EQC	0.076354	0.170732	0.373901	0.538467
(+)eQC-41	EQC	0.042307	0.0946	0.373901	0.538467
(+)eQC-41	EQC	0.023089	0.060176	0.439288	0.590686
(+)eQC-41	EQC	0.101133	0.29279	0.482999	0.628857
(+)eQC-42	EQC	-0.090634	0.083617	0.072471	0.228291
(+)eQC-42	EQC	-0.011137	0.020238	0.285932	0.538467
(+)eQC-42	EQC	-0.024063	0.053806	0.373901	0.538467
(+)eQC-42	EQC	-0.082402	0.229422	0.466909	0.615497
(+)eQC-42	EQC	-0.070303	0.265537	0.585681	0.716222
(+)eQC-42	EQC	-0.044338	0.212081	0.664488	0.77565
CUST_1_PI425129478	TG_00_E9	-0.011723	0.081804	0.764666	0.847827
CUST_1_PI425129481	TS_00_G12	-1.04709	0.278284	0.001092	0.029732
CUST_1_PI425129486	Random_A01_T3	0.352816	0.130619	0.003789	0.044282
CUST_1_PI425196440	FJ668632.1	0.387721	0.1191	0.001892	0.036552
CUST_1_PI425211535	5bias_TS_00_G12	-1.00683	0.312834	0.001976	0.036847
CUST_1_PI425212603	5bias_TS_54_H1	0.051468	0.292188	0.713766	0.811923
CUST_10_PI425129478	TG_00_C5	0.021246	0.106777	0.679387	0.786514
CUST_10_PI425129481	TS_00_H10	-0.017939	0.314181	0.904569	0.941472
CUST_10_PI425129486	Random_A10_T3	0.069171	0.097683	0.188498	0.425336
CUST_10_PI425196440	FJ184596.1	0.49179	0.167002	0.002754	0.039924
CUST_10_PI425211535	5bias_TS_00_H10	0.010458	0.337206	0.948041	0.968342
CUST_10_PI425212603	5bias_TS_55_H10	-0.425043	0.386048	0.069547	0.222191
CUST_100_PI425129478	TG_301_C5	-0.626026	0.55686	0.06579	0.214631
CUST_100_PI425129481	TS_02_A2	-0.024759	0.055363	0.373901	0.538467
CUST_100_PI425129486	Soldier_A12_T3	-0.057821	0.217851	0.58479	0.715465
CUST_100_PI425211535	5bias_TS_02_A2	-0.000144	0.000322	0.373901	0.538467
CUST_100_PI425212603	5bias_TS_50_B5	-0.040779	0.028515	0.032972	0.136749
CUST_1000_PI425129478	TG_302_A7	-0.266448	0.461239	0.266035	0.521342
CUST_1000_PI425129481	TS_13_G11	-0.147046	0.525483	0.565428	0.699739
CUST_1000_PI425211535	5bias_TS_13_G11	-0.185219	0.679488	0.575103	0.707408
CUST_1001_PI425129478	TG_302_A3	0.141173	0.749186	0.695154	0.79796
CUST_1001_PI425129481	TS_13_G12	-0.333154	0.870882	0.44054	0.591836
CUST_1001_PI425211535	5bias_TS_13_G12	-0.355419	0.940335	0.445608	0.596354
CUST_1002_PI425129478	TG_302_A23	0.361455	0.023124	4e-06	0.018393
CUST_1002_PI425129481	TS_13_H4	-0.007417	0.016185	0.363425	0.538467
CUST_1002_PI425211535	5bias_TS_13_H4	-0.000144	0.000322	0.373901	0.538467
CUST_1003_PI425129478	TG_302_C3	-0.335433	0.155479	0.008497	0.061414
CUST_1003_PI425129481	TS_13_H10	-0.275819	0.881291	0.522599	0.662657
CUST_1003_PI425211535	5bias_TS_13_H10	-0.2474	0.814359	0.534216	0.672553
CUST_1004_PI425129478	TG_302_C5	0.08257	0.069885	0.057464	0.195959
CUST_1004_PI425129481	TS_13_H11	0.042578	0.349808	0.798962	0.871534
CUST_1004_PI425211535	5bias_TS_13_H11	-0.065757	0.429211	0.749164	0.836075
CUST_1005_PI425129478	TG_302_C15	-0.086701	0.120473	0.18285	0.418838
CUST_1005_PI425129481	TS_13_H8	-0.406017	0.439219	0.107591	0.297486
CUST_1005_PI425211535	5bias_TS_13_H8	-0.429027	0.497678	0.126161	0.33288
CUST_1006_PI425129478	TG_302_C1	0.044518	0.070065	0.228426	0.477004
CUST_1006_PI425129481	TS_13_H6	-0.000144	0.000322	0.373901	0.538467
CUST_1006_PI425211535	5bias_TS_13_H6	-0.000144	0.000322	0.373901	0.538467
CUST_1007_PI425129478	TG_302_C17	-0.0476	0.096425	0.331603	0.538467
CUST_1007_PI425129481	TS_13_H9	0.063051	0.058979	0.07513	0.234369
CUST_1007_PI425211535	5bias_TS_13_H9	0.050972	0.089032	0.269677	0.525174
CUST_1008_PI425129478	TG_302_A21	0.20087	0.062794	0.002021	0.036906
CUST_1008_PI425129481	TS_13_H7	0.148705	0.186546	0.149253	0.372955
CUST_1008_PI425211535	5bias_TS_13_H7	0.160703	0.204179	0.153228	0.378703
CUST_1009_PI425129478	TG_302_C7	0.33173	0.186541	0.01645	0.088891
CUST_1009_PI425129481	TS_13_A1	0.03312	0.254149	0.785232	0.861528
CUST_1009_PI425211535	5bias_TS_13_A1	0.013095	0.107685	0.799147	0.87163
CUST_101_PI425129478	TG_301_A7	-0.324583	0.837104	0.434844	0.58672
CUST_101_PI425129481	TS_02_A10	-0.053345	0.197993	0.579352	0.711301
CUST_101_PI425129486	Soldier_B01_T3	0.033613	0.117458	0.557056	0.692296
CUST_101_PI425211535	5bias_TS_02_A10	-0.062442	0.243161	0.596573	0.725259
CUST_101_PI425212603	5bias_TS_50_B8	0.2341	0.148578	0.02438	0.112706
CUST_1010_PI425129478	TG_302_A19	-0.030202	0.123091	0.612435	0.737424
CUST_1010_PI425129481	TS_13_A3	0.010408	0.345846	0.94958	0.969159
CUST_1010_PI425211535	5bias_TS_13_A3	0.02353	0.333006	0.882114	0.925135
CUST_1011_PI425129478	TG_302_C9	0.334342	0.241535	0.036388	0.146176
CUST_1011_PI425129481	TS_13_A2	-0.390322	0.384731	0.085864	0.256274
CUST_1011_PI425211535	5bias_TS_13_A2	-0.444139	0.378278	0.058468	0.198351
CUST_1012_PI425129478	TG_302_C13	0.246674	0.28775	0.12773	0.335438
CUST_1012_PI425129481	TS_13_A6	-0.856897	0.384859	0.007605	0.058909
CUST_1012_PI425211535	5bias_TS_13_A6	-0.875355	0.376254	0.006506	0.054944
CUST_1013_PI425129478	TG_302_C11	-0.247251	0.375846	0.215252	0.45999
CUST_1013_PI425129481	TS_13_A5	-0.048799	0.159452	0.531362	0.670099
CUST_1013_PI425211535	5bias_TS_13_A5	-0.069791	0.153197	0.36596	0.538467
CUST_1014_PI425129478	TG_302_C21	0.119445	0.046273	0.004473	0.047178
CUST_1014_PI425129481	TS_13_A9	0.080495	0.533813	0.752928	0.839096
CUST_1014_PI425211535	5bias_TS_13_A9	0.032445	0.646037	0.915996	0.948848
CUST_1015_PI425129478	TG_302_C23	-0.289224	0.55858	0.311369	0.538467
CUST_1015_PI425129481	TS_13_A4	0.157072	0.401701	0.43129	0.583697
CUST_1015_PI425211535	5bias_TS_13_A4	-0.060773	0.308045	0.681904	0.788442
CUST_1016_PI425129478	TG_302_E11	0.188078	0.056224	0.001708	0.035252
CUST_1016_PI425129481	TS_13_A7	0.020263	0.045714	0.377711	0.538564
CUST_1016_PI425211535	5bias_TS_13_A7	-0.000144	0.000322	0.373901	0.538467
CUST_1017_PI425129478	TG_302_E1	-0.816354	0.798041	0.084099	0.252443
CUST_1017_PI425129481	TS_13_A11	0.028018	0.06265	0.373901	0.538467
CUST_1017_PI425211535	5bias_TS_13_A11	-0.058152	0.130032	0.373901	0.538467
CUST_1018_PI425129478	TG_302_E13	0.194831	0.108468	0.015911	0.087269
CUST_1018_PI425129481	TS_13_A8	-0.206161	0.299474	0.198559	0.438362
CUST_1018_PI425211535	5bias_TS_13_A8	-0.188903	0.27706	0.202049	0.443022
CUST_1019_PI425129478	TG_302_E17	0.080778	0.094555	0.128708	0.337241
CUST_1019_PI425129481	TS_13_B3	0.190035	0.379841	0.325907	0.538467
CUST_1019_PI425211535	5bias_TS_13_B3	0.112325	0.32179	0.47869	0.625134
CUST_102_PI425129478	TG_301_A5	0.005932	0.013671	0.386855	0.544838
CUST_102_PI425129481	TS_02_B1	0.216713	0.305739	0.188154	0.424987
CUST_102_PI425129486	Soldier_B02_T3	-0.016439	0.167283	0.836831	0.897374
CUST_102_PI425211535	5bias_TS_02_B1	0.081769	0.116044	0.190237	0.427972
CUST_102_PI425212603	5bias_TS_50_B7	0.143728	0.231138	0.23676	0.4879
CUST_1020_PI425129478	TG_302_E15	0.254486	0.315762	0.145875	0.367394
CUST_1020_PI425129481	TS_13_B4	-0.108255	0.136344	0.150489	0.37464
CUST_1020_PI425211535	5bias_TS_13_B4	-0.087237	0.220146	0.425631	0.579211
CUST_1021_PI425129478	TG_302_C19	0.114123	0.059291	0.012606	0.077424
CUST_1021_PI425129481	TS_13_B2	-0.017303	0.368625	0.92146	0.951575
CUST_1021_PI425211535	5bias_TS_13_B2	-0.053853	0.388912	0.772302	0.852541
CUST_1022_PI425129478	TG_302_E9	-0.040608	0.128329	0.518257	0.659434
CUST_1022_PI425129481	TS_13_B1	-0.820621	0.370514	0.007747	0.05931
CUST_1022_PI425211535	5bias_TS_13_B1	-0.827201	0.381443	0.008345	0.061037
CUST_1023_PI425129478	TG_302_E5	0.244312	0.038994	0.000151	0.019804
CUST_1023_PI425129481	TS_13_A12	0.016813	0.057017	0.545683	0.682798
CUST_1023_PI425211535	5bias_TS_13_A12	0.046445	0.103854	0.373901	0.538467
CUST_1024_PI425129478	TG_302_E3	-0.000144	0.000322	0.373901	0.538467
CUST_1024_PI425129481	TS_13_B5	-0.274491	0.429801	0.226463	0.474604
CUST_1024_PI425211535	5bias_TS_13_B5	-0.290256	0.432005	0.207418	0.449535
CUST_1025_PI425129478	TG_302_G11	0.231835	0.146133	0.023853	0.111007
CUST_1025_PI425129481	TS_13_B9	0.07826	0.107918	0.180218	0.416443
CUST_1025_PI425211535	5bias_TS_13_B9	-0.000144	0.000322	0.373901	0.538467
CUST_1026_PI425129478	TG_302_G1	0.470719	0.204836	0.006798	0.055996
CUST_1026_PI425129481	TS_13_B7	-0.000144	0.000322	0.373901	0.538467
CUST_1026_PI425211535	5bias_TS_13_B7	-0.018951	0.041975	0.369812	0.538467
CUST_1027_PI425129478	TG_302_E21	0.109571	0.072592	0.02791	0.122614
CUST_1027_PI425129481	TS_13_B8	0.08306	0.275414	0.537051	0.675271
CUST_1027_PI425211535	5bias_TS_13_B8	0.113812	0.222046	0.31565	0.538467
CUST_1028_PI425129478	TG_302_G5	0.111172	0.066998	0.020647	0.101599
CUST_1028_PI425129481	TS_13_B6	0.080545	0.222647	0.46393	0.612645
CUST_1028_PI425211535	5bias_TS_13_B6	0.050174	0.205607	0.614302	0.738741
CUST_1029_PI425129478	TG_302_G9	0.185786	0.048453	0.001016	0.028879
CUST_1029_PI425129481	TS_13_C4	0.098574	0.193876	0.319064	0.538467
CUST_1029_PI425211535	5bias_TS_13_C4	0.270276	0.225	0.054884	0.189461
CUST_103_PI425129478	TG_301_A17	-0.012136	0.105447	0.80961	0.879059
CUST_103_PI425129481	TS_02_A12	-1.1545	0.946507	0.052582	0.184014
CUST_103_PI425129486	Soldier_B03_T3	0.092359	0.274131	0.493146	0.63722
CUST_103_PI425211535	5bias_TS_02_A12	-1.16278	0.923114	0.047993	0.174268
CUST_103_PI425212603	5bias_TS_50_C5	0.143186	0.338685	0.398013	0.55473
CUST_1030_PI425129478	TG_302_G3	0.303624	0.140448	0.008437	0.061258
CUST_1030_PI425129481	TS_13_C1	-0.472615	0.407426	0.060439	0.202763
CUST_1030_PI425211535	5bias_TS_13_C1	-0.478669	0.413612	0.060826	0.203353
CUST_1031_PI425129478	TG_302_I1	0.163197	0.174276	0.104367	0.291646
CUST_1031_PI425129481	TS_13_B12	0.055128	0.123674	0.375303	0.538467
CUST_1031_PI425211535	5bias_TS_13_B12	-0.011883	0.02617	0.367373	0.538467
CUST_1032_PI425129478	TG_302_I7	0.220079	0.020042	1.6e-05	0.018393
CUST_1032_PI425129481	TS_13_C3	-0.220193	0.61773	0.470051	0.617877
CUST_1032_PI425211535	5bias_TS_13_C3	-0.224211	0.583224	0.438467	0.590028
CUST_1033_PI425129478	TG_302_G13	0.225608	0.09769	0.006679	0.055513
CUST_1033_PI425129481	TS_13_B11	-0.110845	0.449075	0.610383	0.73591
CUST_1033_PI425211535	5bias_TS_13_B11	-0.135112	0.569022	0.623569	0.746036
CUST_1034_PI425129478	TG_302_G19	0.147446	0.118153	0.049291	0.176904
CUST_1034_PI425129481	TS_13_C2	0.008844	0.291895	0.949239	0.968937
CUST_1034_PI425211535	5bias_TS_13_C2	0.017217	0.314962	0.908609	0.944179
CUST_1035_PI425129478	TG_302_I3	0.123805	0.045644	0.003732	0.044058
CUST_1035_PI425129481	TS_13_C5	-0.777271	0.348189	0.007535	0.058824
CUST_1035_PI425211535	5bias_TS_13_C5	-0.892525	0.530898	0.019789	0.09895
CUST_1036_PI425129478	TG_302_G15	0.183031	0.075064	0.005498	0.05082
CUST_1036_PI425129481	TS_13_B10	-0.102429	0.453026	0.639742	0.757669
CUST_1036_PI425211535	5bias_TS_13_B10	-0.131166	0.549038	0.621512	0.74465
CUST_1037_PI425129478	TG_302_G21	0.014359	0.088801	0.735967	0.827242
CUST_1037_PI425129481	TS_13_C6	-0.963869	0.517323	0.014074	0.082327
CUST_1037_PI425211535	5bias_TS_13_C6	-1.04987	0.560784	0.013848	0.081399
CUST_1038_PI425129478	TG_302_G17	-0.04514	0.099106	0.366051	0.538467
CUST_1038_PI425129481	TS_13_C7	-0.372535	0.482287	0.1592	0.388101
CUST_1038_PI425211535	5bias_TS_13_C7	-0.36783	0.442766	0.136777	0.351741
CUST_1039_PI425129478	TG_302_K1	-0.415542	0.446972	0.106163	0.294832
CUST_1039_PI425129481	TS_13_C8	-0.378117	0.421898	0.115583	0.311609
CUST_1039_PI425211535	5bias_TS_13_C8	-0.372603	0.436202	0.128739	0.337241
CUST_104_PI425129478	TG_301_C13	0.428795	0.168344	0.004695	0.047742
CUST_104_PI425129481	TS_02_B2	0.125521	0.370414	0.490802	0.635547
CUST_104_PI425129486	Soldier_B04_T3	-0.031163	0.202328	0.747891	0.83586
CUST_104_PI425211535	5bias_TS_02_B2	-0.051332	0.330144	0.745611	0.834578
CUST_104_PI425212603	5bias_TS_50_C6	-1.30684	0.223202	0.000197	0.019804
CUST_1040_PI425129478	TG_302_I21	0.191079	0.086599	0.007851	0.059847
CUST_1040_PI425129481	TS_13_C11	-0.52581	0.811739	0.221073	0.467568
CUST_1040_PI425211535	5bias_TS_13_C11	-0.531606	0.797023	0.210116	0.45326
CUST_1041_PI425129478	TG_302_I11	0.084922	0.12613	0.206651	0.448489
CUST_1041_PI425129481	TS_13_C9	-0.251172	0.315401	0.14956	0.373345
CUST_1041_PI425211535	5bias_TS_13_C9	-0.061546	0.222688	0.570023	0.703422
CUST_1042_PI425129478	TG_302_K3	0.059437	0.043938	0.038978	0.1527
CUST_1042_PI425129481	TS_13_C10	-0.11768	0.313508	0.448512	0.598866
CUST_1042_PI425211535	5bias_TS_13_C10	-0.187838	0.233155	0.145991	0.367629
CUST_1043_PI425129478	TG_302_K19	0.120494	0.089818	0.039951	0.15501
CUST_1043_PI425129481	TS_13_C12	-0.332201	0.247051	0.039677	0.154438
CUST_1043_PI425211535	5bias_TS_13_C12	-0.350435	0.26456	0.041477	0.15878
CUST_1044_PI425129478	TG_302_K7	0.009042	0.137193	0.889967	0.931199
CUST_1044_PI425129481	TS_13_D2	-0.537636	0.278588	0.012494	0.076981
CUST_1044_PI425211535	5bias_TS_13_D2	-0.561164	0.298167	0.013604	0.080724
CUST_1045_PI425129478	TG_302_K17	0.11256	0.092242	0.052518	0.183836
CUST_1045_PI425129481	TS_13_D3	-0.229622	0.562282	0.412822	0.56778
CUST_1045_PI425211535	5bias_TS_13_D3	-0.277491	0.564798	0.333625	0.538467
CUST_1046_PI425129478	TG_302_K13	0.130812	0.03951	0.001776	0.03597
CUST_1046_PI425129481	TS_13_D1	0.204936	0.317943	0.222944	0.470108
CUST_1046_PI425211535	5bias_TS_13_D1	0.191751	0.333934	0.268473	0.523863
CUST_1047_PI425129478	TG_302_K9	0.13633	0.096891	0.034639	0.141625
CUST_1047_PI425129481	TS_13_D4	-0.645913	0.249099	0.0044	0.047083
CUST_1047_PI425211535	5bias_TS_13_D4	-0.741674	0.443486	0.020129	0.1001
CUST_1048_PI425129478	TG_302_K21	0.075452	0.043061	0.017275	0.091409
CUST_1048_PI425129481	TS_13_D8	-0.609311	0.427246	0.03325	0.137691
CUST_1048_PI425211535	5bias_TS_13_D8	-0.620561	0.425339	0.031011	0.131399
CUST_1049_PI425129478	TG_302_M17	-0.316485	0.313399	0.086865	0.258134
CUST_1049_PI425129481	TS_13_D7	0.179472	0.23985	0.169608	0.40304
CUST_1049_PI425211535	5bias_TS_13_D7	-0.080385	0.385176	0.665026	0.775995
CUST_105_PI425129478	TG_301_C3	-0.013121	0.057587	0.637227	0.756169
CUST_105_PI425129481	TS_02_B3	-0.000144	0.000322	0.373901	0.538467
CUST_105_PI425129486	Soldier_B06_T3	-0.037755	0.088153	0.392453	0.549609
CUST_105_PI425211535	5bias_TS_02_B3	-0.000144	0.000322	0.373901	0.538467
CUST_105_PI425212603	5bias_TS_50_C7	-0.11013	0.105846	0.080553	0.245306
CUST_1050_PI425129478	TG_302_M13	-1.20808	0.448965	0.003843	0.044499
CUST_1050_PI425129481	TS_13_D9	0.182904	0.080699	0.00714	0.057358
CUST_1050_PI425211535	5bias_TS_13_D9	0.178256	0.048507	0.001196	0.030728
CUST_1051_PI425129478	TG_302_M11	0.087876	0.07653	0.062137	0.205655
CUST_1051_PI425129481	TS_13_D10	0.073571	0.344361	0.657781	0.770626
CUST_1051_PI425211535	5bias_TS_13_D10	-0.031459	0.070344	0.373901	0.538467
CUST_1052_PI425129478	TG_302_M19	0.251358	0.15816	0.02372	0.110695
CUST_1052_PI425129481	TS_13_D11	-0.000144	0.000322	0.373901	0.538467
CUST_1052_PI425211535	5bias_TS_13_D11	-0.000144	0.000322	0.373901	0.538467
CUST_1053_PI425129478	TG_302_M7	0.245281	0.11297	0.00831	0.060932
CUST_1053_PI425129481	TS_13_D5	-0.25675	0.342322	0.168827	0.4018
CUST_1053_PI425211535	5bias_TS_13_D5	-0.198162	0.348756	0.272766	0.528906
CUST_1054_PI425129478	TG_302_M9	-0.004121	0.296683	0.976711	0.985447
CUST_1054_PI425129481	TS_13_D6	-0.005757	0.012474	0.360389	0.538467
CUST_1054_PI425211535	5bias_TS_13_D6	-0.007578	0.016544	0.363648	0.538467
CUST_1055_PI425129478	TG_302_M21	-0.2628	0.254061	0.081764	0.247795
CUST_1055_PI425129481	TS_13_D12	-0.000144	0.000322	0.373901	0.538467
CUST_1055_PI425211535	5bias_TS_13_D12	0.054388	0.122018	0.375322	0.538467
CUST_1056_PI425129478	TG_302_M5	0.142166	0.185366	0.161503	0.391472
CUST_1056_PI425129481	TS_13_E3	-0.000144	0.000322	0.373901	0.538467
CUST_1056_PI425211535	5bias_TS_13_E3	0.243063	0.710011	0.486653	0.631839
CUST_1057_PI425129478	TG_302_O7	-0.002148	0.600068	0.993996	0.996591
CUST_1057_PI425129481	TS_13_E6	0.094064	0.210334	0.373901	0.538467
CUST_1057_PI425211535	5bias_TS_13_E6	-0.000144	0.000322	0.373901	0.538467
CUST_1058_PI425129478	TG_302_O3	0.220507	0.09554	0.006694	0.055565
CUST_1058_PI425129481	TS_13_E4	0.178902	0.300042	0.253308	0.50768
CUST_1058_PI425211535	5bias_TS_13_E4	0.185414	0.239838	0.158931	0.387518
CUST_1059_PI425129478	TG_302_M23	-0.414759	0.171999	0.005722	0.051834
CUST_1059_PI425129481	TS_13_E2	0.193046	0.099742	0.012371	0.076668
CUST_1059_PI425211535	5bias_TS_13_E2	0.166224	0.09288	0.016106	0.08784
CUST_106_PI425129478	TG_301_O23	0.133839	0.087075	0.026367	0.118137
CUST_106_PI425129481	TS_02_B4	-0.346644	0.42945	0.145405	0.36644
CUST_106_PI425129486	Soldier_B07_T3	-0.068293	0.208887	0.505263	0.648489
CUST_106_PI425211535	5bias_TS_02_B4	-0.356637	0.448974	0.15035	0.374412
CUST_106_PI425212603	5bias_TS_50_C10	0.033549	0.075018	0.373901	0.538467
CUST_1060_PI425129478	TG_302_O13	0.149317	0.07756	0.012597	0.077424
CUST_1060_PI425129481	TS_13_E1	0.039687	0.634049	0.895455	0.934954
CUST_1060_PI425211535	5bias_TS_13_E1	-0.26419	0.513612	0.314156	0.538467
CUST_1061_PI425129478	TG_302_O5	0.299622	0.14592	0.010096	0.067976
CUST_1061_PI425129481	TS_13_F1	-0.000144	0.000322	0.373901	0.538467
CUST_1061_PI425211535	5bias_TS_13_F1	-0.000144	0.000322	0.373901	0.538467
CUST_1062_PI425129478	TG_309_B3	0.044091	0.15979	0.570623	0.703901
CUST_1062_PI425129481	TS_13_E10	0.024681	0.409362	0.899268	0.937838
CUST_1062_PI425211535	5bias_TS_13_E10	-0.024306	0.373993	0.891483	0.932228
CUST_1063_PI425129478	TG_309_B11	0.203936	0.055509	0.001197	0.030728
CUST_1063_PI425129481	TS_13_E8	-0.055281	0.213237	0.593205	0.722185
CUST_1063_PI425211535	5bias_TS_13_E8	0.030821	0.077758	0.425519	0.579169
CUST_1064_PI425129478	TG_309_B5	-0.257828	0.270355	0.099931	0.282663
CUST_1064_PI425129481	TS_13_F2	-0.138386	0.29733	0.35677	0.538467
CUST_1064_PI425211535	5bias_TS_13_F2	-0.122722	0.257414	0.346473	0.538467
CUST_1065_PI425129478	TG_309_B9	0.158128	0.128613	0.051416	0.18171
CUST_1065_PI425129481	TS_13_E9	-0.387054	0.584097	0.212537	0.456108
CUST_1065_PI425211535	5bias_TS_13_E9	-0.40396	0.605894	0.210267	0.453352
CUST_1066_PI425129478	TG_309_D3	0.00285	0.193954	0.97536	0.98487
CUST_1066_PI425129481	TS_13_E7	-0.359986	0.801233	0.371912	0.538467
CUST_1066_PI425211535	5bias_TS_13_E7	-0.33701	0.832983	0.416801	0.571454
CUST_1067_PI425129478	TG_309_B17	0.110335	0.113165	0.094727	0.273497
CUST_1067_PI425129481	TS_13_E12	-0.988421	0.576763	0.018586	0.095396
CUST_1067_PI425211535	5bias_TS_13_E12	-0.95883	0.53324	0.015855	0.087141
CUST_1068_PI425129478	TG_309_D1	0.16103	0.304915	0.303063	0.538467
CUST_1068_PI425129481	TS_13_F3	0.145664	0.455624	0.51419	0.656213
CUST_1068_PI425211535	5bias_TS_13_F3	0.009382	0.325851	0.951755	0.970247
CUST_1069_PI425129478	TG_309_B21	0.298961	0.038405	6.4e-05	0.019804
CUST_1069_PI425129481	TS_13_E11	-0.097363	0.205936	0.35005	0.538467
CUST_1069_PI425211535	5bias_TS_13_E11	-0.086643	0.194922	0.376514	0.538467
CUST_107_PI425129478	TG_301_A21	0.039397	0.076474	0.313502	0.538467
CUST_107_PI425129481	TS_02_B9	-0.352671	0.31547	0.066784	0.216843
CUST_107_PI425129486	Soldier_B08_T3	-0.916953	0.746816	0.051614	0.18196
CUST_107_PI425211535	5bias_TS_02_B9	-0.379367	0.359047	0.077442	0.23928
CUST_107_PI425212603	5bias_TS_50_D8	-0.042178	0.304737	0.7724	0.852559
CUST_1070_PI425129478	TG_309_D11	0.024046	0.220576	0.819404	0.885465
CUST_1070_PI425129481	TS_13_F5	0.230227	0.316144	0.178775	0.415243
CUST_1070_PI425211535	5bias_TS_13_F5	0.286283	0.319872	0.115949	0.312258
CUST_1071_PI425129478	TG_309_D19	0.430099	0.098037	0.000605	0.023836
CUST_1071_PI425129481	TS_13_F4	-0.425418	0.581119	0.176982	0.413948
CUST_1071_PI425211535	5bias_TS_13_F4	-0.381624	0.578336	0.214109	0.458287
CUST_1072_PI425129478	TG_309_D21	0.022263	0.061993	0.466974	0.615497
CUST_1072_PI425129481	TS_13_F7	-0.008516	0.225515	0.936767	0.961945
CUST_1072_PI425211535	5bias_TS_13_F7	-0.008894	0.209742	0.929016	0.956231
CUST_1073_PI425129478	TG_309_D13	0.118306	0.138024	0.127768	0.335479
CUST_1073_PI425129481	TS_13_F6	-0.000144	0.000322	0.373901	0.538467
CUST_1073_PI425211535	5bias_TS_13_F6	-0.000144	0.000322	0.373901	0.538467
CUST_1074_PI425129478	TG_309_F3	0.334494	0.072309	0.000493	0.02256
CUST_1074_PI425129481	TS_13_G1	-0.01364	0.030099	0.368216	0.538467
CUST_1074_PI425211535	5bias_TS_13_G1	0.011281	0.025226	0.373901	0.538467
CUST_1075_PI425129478	TG_309_D17	0.121704	0.140165	0.124154	0.329062
CUST_1075_PI425129481	TS_13_F8	-0.857851	0.265692	0.001952	0.036739
CUST_1075_PI425211535	5bias_TS_13_F8	-0.840358	0.201864	0.000741	0.026203
CUST_1076_PI425129478	TG_309_D9	-0.034586	0.176949	0.684631	0.790202
CUST_1076_PI425129481	TS_13_F12	-0.024646	0.054709	0.370758	0.538467
CUST_1076_PI425211535	5bias_TS_13_F12	-0.000144	0.000322	0.373901	0.538467
CUST_1077_PI425129478	TG_309_D7	0.151884	0.143754	0.07745	0.23928
CUST_1077_PI425129481	TS_13_F11	-0.197936	0.60866	0.507399	0.650245
CUST_1077_PI425211535	5bias_TS_13_F11	-0.200684	0.586191	0.486633	0.631839
CUST_1078_PI425129478	TG_309_D15	0.212913	0.122085	0.017547	0.092068
CUST_1078_PI425129481	TS_13_F9	-0.299864	0.448813	0.209486	0.452335
CUST_1078_PI425211535	5bias_TS_13_F9	-0.296423	0.409889	0.18117	0.417094
CUST_1079_PI425129478	TG_309_F11	-0.498278	0.194804	0.004624	0.047307
CUST_1079_PI425129481	TS_13_F10	-1.62032	0.289296	0.000234	0.019804
CUST_1079_PI425211535	5bias_TS_13_F10	-1.59015	0.298532	0.000285	0.019804
CUST_108_PI425129478	TG_301_A9	-0.062318	0.105585	0.257383	0.512396
CUST_108_PI425129481	TS_02_B6	0.524164	0.189146	0.003449	0.04275
CUST_108_PI425129486	Soldier_B09_T3	0.183247	0.321025	0.270889	0.526773
CUST_108_PI425211535	5bias_TS_02_B6	0.448329	0.145384	0.002319	0.038265
CUST_108_PI425212603	5bias_TS_50_D3	0.079968	0.179216	0.374868	0.538467
CUST_1080_PI425129478	TG_309_F7	0.059245	0.061201	0.096388	0.276365
CUST_1080_PI425129481	TS_13_G2	0.124063	0.290885	0.394249	0.551449
CUST_1080_PI425211535	5bias_TS_13_G2	0.166657	0.305506	0.289543	0.538467
CUST_1081_PI425129478	TG_309_F21	0.018632	0.164802	0.812882	0.881299
CUST_1081_PI425129481	TS_13_G4	0.248802	0.649464	0.439946	0.591289
CUST_1081_PI425211535	5bias_TS_13_G4	0.26319	0.573842	0.363067	0.538467
CUST_1082_PI425129478	TG_309_F13	0.199133	0.255166	0.155918	0.382768
CUST_1082_PI425129481	TS_13_G5	-0.000144	0.000322	0.373901	0.538467
CUST_1082_PI425211535	5bias_TS_13_G5	-0.064259	0.165519	0.434321	0.586392
CUST_1083_PI425129478	TG_309_H11	0.195202	0.099093	0.011648	0.073929
CUST_1083_PI425129481	TS_13_G3	-0.081729	0.232923	0.47655	0.623584
CUST_1083_PI425211535	5bias_TS_13_G3	-0.068739	0.235533	0.549629	0.686388
CUST_1084_PI425129478	TG_309_H15	0.039584	0.055692	0.187183	0.42395
CUST_1084_PI425129481	TS_13_G8	0.141461	0.097003	0.031055	0.131479
CUST_1084_PI425211535	5bias_TS_13_G8	0.14513	0.13795	0.078306	0.240976
CUST_1085_PI425129478	TG_309_H23	0.023721	0.120524	0.682603	0.788832
CUST_1085_PI425129481	TS_13_G6	0.036989	0.051076	0.180688	0.416735
CUST_1085_PI425211535	5bias_TS_13_G6	0.14943	0.161723	0.107706	0.297699
CUST_1086_PI425129478	TG_309_J7	0.239492	0.055683	0.000654	0.024319
CUST_1086_PI425129481	TS_13_G7	0.057017	0.6057	0.843573	0.900922
CUST_1086_PI425211535	5bias_TS_13_G7	0.05513	0.80917	0.886288	0.928523
CUST_1087_PI425129478	TG_309_J23	0.181969	0.031097	0.000197	0.019804
CUST_1087_PI425129481	TS_13_G9	-1.56572	0.488337	0.002004	0.036886
CUST_1087_PI425211535	5bias_TS_13_G9	-1.52442	0.492383	0.002285	0.037982
CUST_1088_PI425129478	TG_309_L5	-0.732825	0.545355	0.039756	0.154633
CUST_1088_PI425129481	TS_14_H7	-0.030612	0.280702	0.819341	0.885465
CUST_1088_PI425211535	5bias_TS_14_H7	-0.028248	0.249251	0.812437	0.88106
CUST_1089_PI425129478	TG_309_J15	0.023311	0.133024	0.715153	0.812737
CUST_1089_PI425129481	TS_14_H11	-0.035348	0.483764	0.878138	0.922502
CUST_1089_PI425211535	5bias_TS_14_H11	0.005986	0.758387	0.986764	0.992248
CUST_109_PI425129478	TG_301_C9	0.14537	0.101693	0.033011	0.136854
CUST_109_PI425129481	TS_02_B11	0.054751	0.236281	0.631703	0.75245
CUST_109_PI425129486	Soldier_B10_T3	0.465715	0.104177	0.000563	0.023625
CUST_109_PI425211535	5bias_TS_02_B11	0.082302	0.275693	0.540972	0.678846
CUST_109_PI425212603	5bias_TS_50_D7	-0.285165	0.373691	0.163136	0.393672
CUST_1090_PI425129478	TG_309_J19	0.009221	0.214852	0.928162	0.955566
CUST_1090_PI425129481	TS_14_H12	-0.005256	0.12938	0.931988	0.958601
CUST_1090_PI425211535	5bias_TS_14_H12	-0.000144	0.000322	0.373901	0.538467
CUST_1091_PI425129478	TG_309_L3	0.157866	0.080788	0.011973	0.075088
CUST_1091_PI425129481	TS_14_A7	-0.758805	0.42143	0.015784	0.086902
CUST_1091_PI425211535	5bias_TS_14_A7	-0.823742	0.502497	0.021475	0.104266
CUST_1092_PI425129478	TG_309_J21	-0.104493	0.385499	0.577159	0.709105
CUST_1092_PI425129481	TS_14_A1	-0.305224	0.388675	0.153939	0.379865
CUST_1092_PI425211535	5bias_TS_14_A1	-0.295522	0.430793	0.199829	0.439808
CUST_1093_PI425129478	TG_309_L15	0.070769	0.093374	0.165375	0.396583
CUST_1093_PI425129481	TS_14_A4	-0.401397	0.364427	0.069474	0.222046
CUST_1093_PI425211535	5bias_TS_14_A4	-0.401287	0.366747	0.070699	0.224687
CUST_1094_PI425129478	TG_309_3	0.128439	0.151197	0.130315	0.339984
CUST_1094_PI425129481	TS_14_A3	0.06512	0.176677	0.456148	0.605263
CUST_1094_PI425211535	5bias_TS_14_A3	0.144456	0.21061	0.199883	0.439866
CUST_1095_PI425129478	TG_309_L21	0.17505	0.515681	0.490098	0.635001
CUST_1095_PI425129481	TS_14_A2	-0.81246	0.461367	0.016993	0.090612
CUST_1095_PI425211535	5bias_TS_14_A2	-0.424739	0.379976	0.066803	0.216859
CUST_1096_PI425129478	TG_309_L17	-0.023434	0.06224	0.447234	0.598048
CUST_1096_PI425129481	TS_14_A8	-0.204975	0.310208	0.2136	0.457729
CUST_1096_PI425211535	5bias_TS_14_A8	-0.216224	0.275271	0.153859	0.379789
CUST_1097_PI425129478	TG_309_L13	0.058451	0.091988	0.2284	0.477004
CUST_1097_PI425129481	TS_14_A6	-0.000144	0.000322	0.373901	0.538467
CUST_1097_PI425211535	5bias_TS_14_A6	-0.000144	0.000322	0.373901	0.538467
CUST_1098_PI425129478	TG_309_L11	0.273903	0.281049	0.094828	0.273687
CUST_1098_PI425129481	TS_14_A9	0.091706	0.091955	0.08961	0.263643
CUST_1098_PI425211535	5bias_TS_14_A9	0.092288	0.100481	0.109227	0.300218
CUST_1099_PI425129478	TG_309_23	0.184368	0.042924	0.000657	0.024389
CUST_1099_PI425129481	TS_14_A10	-0.172194	0.621546	0.569139	0.702708
CUST_1099_PI425211535	5bias_TS_14_A10	-0.126566	0.600481	0.661978	0.7737
CUST_11_PI425129478	TG_00_E4	0.413693	0.099197	0.000736	0.026163
CUST_11_PI425129481	TS_00_A2	0.015113	0.098304	0.748329	0.835931
CUST_11_PI425129486	Random_A11_T3	-0.126876	0.26625	0.34667	0.538467
CUST_11_PI425196440	FJ184600.1	0.521231	0.131951	0.000907	0.027924
CUST_11_PI425211535	5bias_TS_00_A2	0.023437	0.129944	0.707354	0.806773
CUST_11_PI425212603	5bias_TS_55_H7	-0.268804	0.287602	0.104841	0.292606
CUST_110_PI425129478	TG_301_A13	0.050342	0.070409	0.185115	0.42199
CUST_110_PI425129481	TS_02_B12	-0.264202	0.369206	0.184823	0.421454
CUST_110_PI425129486	Soldier_B11_T3	0.162431	0.039572	0.000783	0.02672
CUST_110_PI425211535	5bias_TS_02_B12	-0.255714	0.335185	0.163223	0.393821
CUST_110_PI425212603	5bias_TS_50_D5	-0.208834	0.406286	0.314457	0.538467
CUST_1100_PI425129478	TG_309_19	0.002523	0.102349	0.958688	0.974915
CUST_1100_PI425129481	TS_14_B8	-0.190305	0.674406	0.562313	0.696903
CUST_1100_PI425211535	5bias_TS_14_B8	-0.24171	0.738128	0.50462	0.647792
CUST_1101_PI425129478	TG_309_11	0.02789	0.186443	0.754807	0.839973
CUST_1101_PI425129481	TS_14_B10	0.042187	0.046403	0.111841	0.305165
CUST_1101_PI425211535	5bias_TS_14_B10	0.040448	0.060599	0.209844	0.452797
CUST_1102_PI425129478	TG_309_15	0.164957	0.088579	0.014098	0.082406
CUST_1102_PI425129481	TS_14_B1	0.312	0.57096	0.28883	0.538467
CUST_1102_PI425211535	5bias_TS_14_B1	0.033779	0.075936	0.376188	0.538467
CUST_1103_PI425129478	TG_309_7	0.107151	0.058496	0.014902	0.084435
CUST_1103_PI425129481	TS_14_B7	-0.374464	0.741886	0.322154	0.538467
CUST_1103_PI425211535	5bias_TS_14_B7	-0.319075	0.556103	0.26879	0.524175
CUST_1104_PI425129478	TG_309_5	0.171377	0.081412	0.00926	0.064779
CUST_1104_PI425129481	TS_14_B3	-0.008633	0.414217	0.965065	0.979123
CUST_1104_PI425211535	5bias_TS_14_B3	0.222512	0.205722	0.072877	0.229109
CUST_1105_PI425129478	TG_309_21	0.079675	0.054844	0.031421	0.13235
CUST_1105_PI425129481	TS_14_B6	0.186126	0.13884	0.040036	0.155141
CUST_1105_PI425211535	5bias_TS_14_B6	0.191883	0.131546	0.031031	0.131448
CUST_1106_PI425129478	TG_302_D9	0.485465	0.054994	3.9e-05	0.019804
CUST_1106_PI425129481	TS_14_A12	-0.049969	0.455841	0.818428	0.884873
CUST_1106_PI425211535	5bias_TS_14_A12	0.001634	0.432063	0.993657	0.996382
CUST_1107_PI425129478	TG_302_B17	0.132686	0.332053	0.42208	0.575947
CUST_1107_PI425129481	TS_14_A11	-0.948306	0.880292	0.073648	0.230705
CUST_1107_PI425211535	5bias_TS_14_A11	-0.891736	0.804253	0.068262	0.219693
CUST_1108_PI425129478	TG_302_B1	-0.307349	0.598499	0.314848	0.538467
CUST_1108_PI425129481	TS_14_B9	-0.536083	0.822834	0.218892	0.464614
CUST_1108_PI425211535	5bias_TS_14_B9	-0.537702	0.846702	0.228623	0.477162
CUST_1109_PI425129478	TG_302_B3	-0.811646	0.314229	0.004462	0.047178
CUST_1109_PI425129481	TS_14_B5	-0.019879	0.069067	0.55488	0.690715
CUST_1109_PI425211535	5bias_TS_14_B5	0.025665	0.094776	0.577509	0.70937
CUST_111_PI425129478	TG_301_E5	0.030084	0.130335	0.632984	0.753079
CUST_111_PI425129481	TS_02_B10	0.219904	0.135809	0.022344	0.106661
CUST_111_PI425129486	Soldier_B12_T3	-1.07641	0.813879	0.041663	0.159098
CUST_111_PI425211535	5bias_TS_02_B10	0.151789	0.250303	0.246596	0.500085
CUST_111_PI425212603	5bias_TS_50_D6	-0.615559	0.84441	0.178424	0.415012
CUST_1110_PI425129478	TG_302_B19	0.077542	0.079779	0.09545	0.274876
CUST_1110_PI425129481	TS_14_B4	-0.105352	0.509006	0.667556	0.777729
CUST_1110_PI425211535	5bias_TS_14_B4	-0.113195	0.493892	0.635312	0.754647
CUST_1111_PI425129478	TG_302_B11	0.158923	0.106866	0.029233	0.126139
CUST_1111_PI425129481	TS_14_B2	-0.061811	0.221696	0.566785	0.70077
CUST_1111_PI425211535	5bias_TS_14_B2	-0.072473	0.208742	0.480897	0.626795
CUST_1112_PI425129478	TG_302_B9	0.071738	0.112049	0.225512	0.473367
CUST_1112_PI425129481	TS_14_C2	-0.020287	0.225484	0.850374	0.90516
CUST_1112_PI425211535	5bias_TS_14_C2	-0.02316	0.211504	0.818618	0.885018
CUST_1113_PI425129478	TG_302_B7	0.115116	0.342817	0.494497	0.638547
CUST_1113_PI425129481	TS_14_B11	-0.471053	0.520219	0.112888	0.307061
CUST_1113_PI425211535	5bias_TS_14_B11	-0.440901	0.480889	0.109674	0.30113
CUST_1114_PI425129478	TG_302_P23	-0.046064	0.245438	0.696288	0.798853
CUST_1114_PI425129481	TS_14_B12	-0.244966	0.405366	0.247977	0.501595
CUST_1114_PI425211535	5bias_TS_14_B12	-0.300117	0.411832	0.178539	0.415169
CUST_1115_PI425129478	TG_302_B5	0.194839	0.193837	0.087876	0.260108
CUST_1115_PI425129481	TS_14_C1	-0.080275	0.154569	0.3101	0.538467
CUST_1115_PI425211535	5bias_TS_14_C1	-0.078873	0.203501	0.435022	0.586768
CUST_1116_PI425129478	TG_302_B23	0.208272	0.027226	6.9e-05	0.019804
CUST_1116_PI425129481	TS_14_C4	-0.363837	0.373496	0.094931	0.273885
CUST_1116_PI425211535	5bias_TS_14_C4	-0.288062	0.367373	0.154414	0.380618
CUST_1117_PI425129478	TG_302_D3	0.109831	0.318203	0.483296	0.629089
CUST_1117_PI425129481	TS_14_C3	-0.00571	0.252814	0.962143	0.977189
CUST_1117_PI425211535	5bias_TS_14_C3	0.002045	0.259014	0.986762	0.992248
CUST_1118_PI425129478	TG_302_B21	0.026854	0.066663	0.418647	0.573223
CUST_1118_PI425129481	TS_14_C8	-0.078547	0.225139	0.478899	0.62533
CUST_1118_PI425211535	5bias_TS_14_C8	-0.108254	0.26772	0.417039	0.57163
CUST_1119_PI425129478	TG_302_D21	0.069182	0.115029	0.249872	0.503707
CUST_1119_PI425129481	TS_14_C7	0.211863	0.219346	0.096913	0.277292
CUST_1119_PI425211535	5bias_TS_14_C7	0.199082	0.323673	0.241024	0.493428
CUST_112_PI425129478	TG_301_E1	0.076817	0.162767	0.350807	0.538467
CUST_112_PI425129481	TS_02_C1	-0.288331	0.703238	0.411123	0.566383
CUST_112_PI425129486	Soldier_C01_T3	-0.012952	0.059554	0.652202	0.766714
CUST_112_PI425211535	5bias_TS_02_C1	-0.279446	0.697898	0.421212	0.575344
CUST_112_PI425212603	5bias_TS_50_D9	-1.12633	0.493724	0.006977	0.056818
CUST_1120_PI425129478	TG_302_D11	-0.239894	0.227783	0.078092	0.24051
CUST_1120_PI425129481	TS_14_C9	0.010275	0.023381	0.381401	0.540527
CUST_1120_PI425211535	5bias_TS_14_C9	-0.007997	0.017481	0.364188	0.538467
CUST_1121_PI425129478	TG_302_D17	0.057586	0.129171	0.375243	0.538467
CUST_1121_PI425129481	TS_14_C5	-0.54777	0.24637	0.007643	0.059061
CUST_1121_PI425211535	5bias_TS_14_C5	-0.605805	0.233311	0.004378	0.046911
CUST_1122_PI425129478	TG_302_F3	0.305887	0.16599	0.014605	0.083569
CUST_1122_PI425129481	TS_14_C6	0.001641	0.16692	0.983514	0.990245
CUST_1122_PI425211535	5bias_TS_14_C6	0.054052	0.172639	0.522444	0.662515
CUST_1123_PI425129478	TG_302_D23	0.557121	0.055902	2.4e-05	0.018393
CUST_1123_PI425129481	TS_14_D3	0.172128	0.430004	0.421335	0.575366
CUST_1123_PI425211535	5bias_TS_14_D3	0.170536	0.416378	0.411576	0.56661
CUST_1124_PI425129478	TG_302_F1	0.232937	0.430536	0.292963	0.538467
CUST_1124_PI425129481	TS_14_D2	0.138283	0.212982	0.220191	0.466302
CUST_1124_PI425211535	5bias_TS_14_D2	0.016424	0.155474	0.824867	0.88854
CUST_1125_PI425129478	TG_302_D15	-0.031538	0.253048	0.794301	0.86809
CUST_1125_PI425129481	TS_14_C10	0.078999	0.399219	0.681015	0.787901
CUST_1125_PI425211535	5bias_TS_14_C10	0.140103	0.343655	0.413545	0.568475
CUST_1126_PI425129478	TG_302_D13	0.08751	0.108009	0.144262	0.364499
CUST_1126_PI425129481	TS_14_D1	-0.87832	0.416689	0.009217	0.06454
CUST_1126_PI425211535	5bias_TS_14_D1	-0.923556	0.444947	0.009725	0.066562
CUST_1127_PI425129478	TG_302_D19	-0.00392	0.153719	0.957258	0.973872
CUST_1127_PI425129481	TS_14_C12	-0.435695	0.398663	0.070919	0.225022
CUST_1127_PI425211535	5bias_TS_14_C12	-0.43739	0.406548	0.073898	0.231138
CUST_1128_PI425129478	TG_302_H11	-0.517575	0.271287	0.012991	0.078795
CUST_1128_PI425129481	TS_14_D4	-0.790073	0.48177	0.021447	0.104166
CUST_1128_PI425211535	5bias_TS_14_D4	-0.806852	0.49762	0.022246	0.106537
CUST_1129_PI425129478	TG_302_F13	0.033023	0.078623	0.400807	0.557046
CUST_1129_PI425129481	TS_14_D5	-0.048307	0.241872	0.678283	0.78564
CUST_1129_PI425211535	5bias_TS_14_D5	-0.015314	0.267853	0.904446	0.941406
CUST_113_PI425129478	TG_301_C23	0.327738	0.227151	0.032089	0.134297
CUST_113_PI425129481	TS_02_B8	0.015587	0.034855	0.373901	0.538467
CUST_113_PI425129486	Soldier_C02_T3	-0.92424	0.726511	0.046648	0.170883
CUST_113_PI425211535	5bias_TS_02_B8	-0.000144	0.000322	0.373901	0.538467
CUST_113_PI425212603	5bias_TS_50_D10	-0.117892	0.325095	0.462921	0.611414
CUST_1130_PI425129478	TG_302_F23	0.096304	0.1447	0.210919	0.454005
CUST_1130_PI425129481	TS_14_D7	0.286897	0.132126	0.008307	0.060932
CUST_1130_PI425211535	5bias_TS_14_D7	0.379033	0.122086	0.002261	0.037867
CUST_1131_PI425129478	TG_302_F21	0.035828	0.113528	0.519323	0.660206
CUST_1131_PI425129481	TS_14_D6	0.170232	0.149627	0.06371	0.209452
CUST_1131_PI425211535	5bias_TS_14_D6	0.11297	0.235255	0.343388	0.538467
CUST_1132_PI425129478	TG_302_F19	0.426442	0.187032	0.006991	0.056869
CUST_1132_PI425129481	TS_14_D9	-0.645239	1.09378	0.257584	0.512546
CUST_1132_PI425211535	5bias_TS_14_D9	-0.640379	1.04201	0.241348	0.493945
CUST_1133_PI425129478	TG_302_H15	-0.057486	0.60799	0.842894	0.900638
CUST_1133_PI425129481	TS_14_D10	-0.872033	0.381173	0.006907	0.056454
CUST_1133_PI425211535	5bias_TS_14_D10	-0.911204	0.342193	0.003993	0.045214
CUST_1134_PI425129478	TG_302_J3	0.208448	0.113412	0.014734	0.084015
CUST_1134_PI425129481	TS_14_E3	0.205608	0.190987	0.073775	0.230964
CUST_1134_PI425211535	5bias_TS_14_E3	0.350472	0.300699	0.059658	0.201131
CUST_1135_PI425129478	TG_302_H21	-0.118887	0.468461	0.600726	0.728548
CUST_1135_PI425129481	TS_14_E5	-0.590622	0.250798	0.00623	0.053643
CUST_1135_PI425211535	5bias_TS_14_E5	-0.546372	0.246717	0.007751	0.05931
CUST_1136_PI425129478	TG_302_H19	0.270863	0.052366	0.000319	0.019804
CUST_1136_PI425129481	TS_14_E4	-0.01633	0.309677	0.91182	0.946328
CUST_1136_PI425211535	5bias_TS_14_E4	0.003974	0.27408	0.975691	0.985015
CUST_1137_PI425129478	TG_302_H17	0.009108	0.079524	0.810514	0.879761
CUST_1137_PI425129481	TS_14_E1	0.017342	0.147291	0.805341	0.875837
CUST_1137_PI425211535	5bias_TS_14_E1	-0.054782	0.127635	0.391531	0.548806
CUST_1138_PI425129478	TG_302_J23	-0.030378	0.166315	0.703876	0.804218
CUST_1138_PI425129481	TS_14_D11	-0.056671	0.154828	0.459049	0.607921
CUST_1138_PI425211535	5bias_TS_14_D11	-0.044228	0.16564	0.582618	0.714192
CUST_1139_PI425129478	TG_302_L5	0.36363	0.089557	0.000816	0.027327
CUST_1139_PI425129481	TS_14_E2	0.137406	0.30725	0.373901	0.538467
CUST_1139_PI425211535	5bias_TS_14_E2	0.043139	0.096463	0.373901	0.538467
CUST_114_PI425129478	TG_301_E13	-0.35879	0.508658	0.189873	0.427483
CUST_114_PI425129481	TS_02_C2	0.004748	0.208519	0.961836	0.977084
CUST_114_PI425129486	Soldier_C03_T3	-0.177316	0.389637	0.366417	0.538467
CUST_114_PI425211535	5bias_TS_02_C2	0.053375	0.200604	0.5839	0.715083
CUST_114_PI425212603	5bias_TS_50_E6	-0.112284	0.384795	0.549684	0.686388
CUST_1140_PI425129478	TG_302_J17	0.239573	0.053823	0.000572	0.02371
CUST_1140_PI425129481	TS_14_D12	-0.054033	0.143735	0.44789	0.598441
CUST_1140_PI425211535	5bias_TS_14_D12	-0.041032	0.152913	0.580829	0.712613
CUST_1141_PI425129478	TG_302_J11	0.203233	0.071428	0.003129	0.04156
CUST_1141_PI425129481	TS_14_E7	-0.090564	0.130303	0.195123	0.433757
CUST_1141_PI425211535	5bias_TS_14_E7	-0.053938	0.139976	0.437471	0.58907
CUST_1142_PI425129478	TG_302_L3	0.465588	0.105016	0.000581	0.02371
CUST_1142_PI425129481	TS_14_E9	-0.258861	0.302894	0.128598	0.337152
CUST_1142_PI425211535	5bias_TS_14_E9	-0.205965	0.266853	0.159453	0.388536
CUST_1143_PI425129478	TG_302_J15	0.113637	0.045663	0.005108	0.049611
CUST_1143_PI425129481	TS_14_E6	-2.0268	0.784693	0.004463	0.047178
CUST_1143_PI425211535	5bias_TS_14_E6	-1.76073	0.390759	0.000546	0.023521
CUST_1144_PI425129478	TG_302_L1	0.095477	0.055875	0.018764	0.095832
CUST_1144_PI425129481	TS_14_E8	-0.368437	0.866414	0.395513	0.552518
CUST_1144_PI425211535	5bias_TS_14_E8	-0.415523	0.855796	0.338665	0.538467
CUST_1145_PI425129478	TG_302_L9	0.196436	0.124025	0.023979	0.11141
CUST_1145_PI425129481	TS_14_E11	-0.563555	0.372619	0.027738	0.122268
CUST_1145_PI425211535	5bias_TS_14_E11	-0.609641	0.361084	0.019515	0.098173
CUST_1146_PI425129478	TG_302_7	-0.819198	1.25634	0.218577	0.464259
CUST_1146_PI425129481	TS_14_F1	-0.025681	0.27412	0.844308	0.901434
CUST_1146_PI425211535	5bias_TS_14_F1	-0.256424	0.117702	0.008211	0.060791
CUST_1147_PI425129478	TG_302_3	0.037849	0.129268	0.548394	0.685319
CUST_1147_PI425129481	TS_14_E10	-0.011723	0.103735	0.812965	0.881328
CUST_1147_PI425211535	5bias_TS_14_E10	-0.022183	0.055087	0.418802	0.573298
CUST_1148_PI425129478	TG_302_L21	0.091253	0.034316	0.004013	0.045214
CUST_1148_PI425129481	TS_14_E12	-0.019299	0.174267	0.816615	0.883885
CUST_1148_PI425211535	5bias_TS_14_E12	-0.026481	0.138276	0.690542	0.795042
CUST_1149_PI425129478	TG_302_L17	0.332089	0.097521	0.001597	0.034456
CUST_1149_PI425129481	TS_14_F4	0.014312	0.318597	0.92482	0.953539
CUST_1149_PI425211535	5bias_TS_14_F4	0.005741	0.324833	0.970369	0.982288
CUST_115_PI425129478	TG_301_E3	0.303619	0.077151	0.00092	0.028105
CUST_115_PI425129481	TS_02_C4	-0.046279	0.495764	0.844854	0.901739
CUST_115_PI425129486	Soldier_C05_T3	-0.038976	0.163489	0.622217	0.745268
CUST_115_PI425211535	5bias_TS_02_C4	-0.163011	0.623981	0.590472	0.720234
CUST_115_PI425212603	5bias_TS_50_E10	-0.191956	0.30039	0.226236	0.474445
CUST_1150_PI425129478	TG_302_1	0.296697	0.093814	0.00211	0.037103
CUST_1150_PI425129481	TS_14_F6	-0.000144	0.000322	0.373901	0.538467
CUST_1150_PI425211535	5bias_TS_14_F6	-0.000144	0.000322	0.373901	0.538467
CUST_1151_PI425129478	TG_302_9	-0.955745	0.500094	0.012915	0.078462
CUST_1151_PI425129481	TS_14_F5	-0.468472	0.254056	0.014574	0.083527
CUST_1151_PI425211535	5bias_TS_14_F5	-0.291471	0.206789	0.034456	0.141168
CUST_1152_PI425129478	TG_302_11	0.277573	0.148654	0.013971	0.081888
CUST_1152_PI425129481	TS_14_F2	-0.163474	0.303537	0.294872	0.538467
CUST_1152_PI425211535	5bias_TS_14_F2	-0.156711	0.294099	0.299324	0.538467
CUST_1153_PI425129478	TG_302_L13	-0.133475	0.83156	0.737802	0.828668
CUST_1153_PI425129481	TS_14_F3	-0.683934	0.246054	0.00341	0.04264
CUST_1153_PI425211535	5bias_TS_14_F3	-0.486394	0.225988	0.008568	0.061702
CUST_1154_PI425129478	TG_302_P7	0.239632	0.06143	0.000952	0.028482
CUST_1154_PI425129481	TS_14_F7	0.036876	0.289364	0.789819	0.864993
CUST_1154_PI425211535	5bias_TS_14_F7	0.042964	0.317356	0.777193	0.856228
CUST_1155_PI425129478	TG_302_19	0.251007	0.057866	0.000632	0.024239
CUST_1155_PI425129481	TS_14_F11	-0.045203	0.100149	0.369944	0.538467
CUST_1155_PI425211535	5bias_TS_14_F11	-0.008887	0.226489	0.934303	0.960223
CUST_1156_PI425129478	TG_302_15	0.17522	0.055804	0.002168	0.037495
CUST_1156_PI425129481	TS_14_F8	-0.193553	0.348959	0.282663	0.538467
CUST_1156_PI425211535	5bias_TS_14_F8	-0.165211	0.341888	0.340699	0.538467
CUST_1157_PI425129478	TG_302_P15	0.047611	0.099197	0.343594	0.538467
CUST_1157_PI425129481	TS_14_F9	0.411905	0.194485	0.009065	0.063988
CUST_1157_PI425211535	5bias_TS_14_F9	0.434886	0.220386	0.011579	0.073648
CUST_1158_PI425129478	TG_302_P1	-0.454432	0.385246	0.057723	0.196616
CUST_1158_PI425129481	TS_14_F10	-1.16756	0.632481	0.01452	0.083495
CUST_1158_PI425211535	5bias_TS_14_F10	-1.19496	0.668626	0.01618	0.088038
CUST_1159_PI425129478	TG_302_P5	0.180036	0.122774	0.03053	0.129804
CUST_1159_PI425129481	TS_14_F12	0.321415	0.167414	0.012716	0.077879
CUST_1159_PI425211535	5bias_TS_14_F12	0.324865	0.163009	0.011192	0.072103
CUST_116_PI425129478	TG_301_E11	-0.037314	0.088529	0.399314	0.555707
CUST_116_PI425129481	TS_02_C3	-0.068924	0.410407	0.726333	0.820702
CUST_116_PI425129486	Soldier_C06_T3	-0.223268	0.109101	0.010215	0.068333
CUST_116_PI425211535	5bias_TS_02_C3	-0.013978	0.454691	0.948495	0.968617
CUST_116_PI425212603	5bias_TS_50_E9	-0.039837	0.164435	0.616769	0.740672
CUST_1160_PI425129478	TG_302_17	-0.168399	0.333148	0.32154	0.538467
CUST_1160_PI425129481	TS_14_G1	-0.166108	0.436896	0.443133	0.594404
CUST_1160_PI425211535	5bias_TS_14_G1	-0.131262	0.375916	0.478553	0.625085
CUST_1161_PI425129478	TG_302_P13	-0.563673	0.408672	0.036782	0.147101
CUST_1161_PI425129481	TS_14_G2	0.059606	0.133283	0.373901	0.538467
CUST_1161_PI425211535	5bias_TS_14_G2	0.017123	0.084664	0.674543	0.783001
CUST_1162_PI425129478	TG_302_P9	0.201964	0.150068	0.039576	0.154199
CUST_1162_PI425129481	TS_14_G4	0.167701	0.374991	0.373901	0.538467
CUST_1162_PI425211535	5bias_TS_14_G4	0.32031	0.355769	0.11438	0.30973
CUST_1163_PI425129478	TG_302_23	0.216781	0.081068	0.003932	0.04488
CUST_1163_PI425129481	TS_14_G7	-0.47765	0.826133	0.265686	0.520932
CUST_1163_PI425211535	5bias_TS_14_G7	-0.374395	0.743549	0.323182	0.538467
CUST_1164_PI425129478	TG_302_21	-0.184071	0.056105	0.001838	0.036343
CUST_1164_PI425129481	TS_14_G5	0.220123	0.135551	0.022137	0.106245
CUST_1164_PI425211535	5bias_TS_14_G5	0.205141	0.147601	0.035949	0.144949
CUST_1165_PI425129478	TG_302_P19	0.395101	0.087851	0.00055	0.023521
CUST_1165_PI425129481	TS_14_G3	0.043424	0.147618	0.546615	0.683583
CUST_1165_PI425211535	5bias_TS_14_G3	0.062493	0.122694	0.318317	0.538467
CUST_1166_PI425129478	TG_302_A10	-0.035657	0.079733	0.373901	0.538467
CUST_1166_PI425129481	TS_14_G8	-0.000144	0.000322	0.373901	0.538467
CUST_1166_PI425211535	5bias_TS_14_G8	0.011532	0.025786	0.373901	0.538467
CUST_1167_PI425129478	TG_302_A6	0.066062	0.059821	0.068996	0.22106
CUST_1167_PI425129481	TS_14_G9	-0.000144	0.000322	0.373901	0.538467
CUST_1167_PI425211535	5bias_TS_14_G9	-0.013569	0.029939	0.368186	0.538467
CUST_1168_PI425129478	TG_302_A12	0.078669	0.18766	0.401633	0.557702
CUST_1168_PI425129481	TS_14_G12	0.019134	0.151054	0.791041	0.865668
CUST_1168_PI425211535	5bias_TS_14_G12	0.055615	0.171391	0.508269	0.65099
CUST_1169_PI425129478	TG_302_A2	-0.094108	0.340814	0.570362	0.70372
CUST_1169_PI425129481	TS_14_G10	-0.731397	0.33197	0.007893	0.060047
CUST_1169_PI425211535	5bias_TS_14_G10	-0.753932	0.326787	0.006703	0.055565
CUST_117_PI425129478	TG_301_E7	0.012504	0.364617	0.942556	0.965307
CUST_117_PI425129481	TS_02_C5	-0.081969	0.269883	0.534315	0.672553
CUST_117_PI425129486	Soldier_C07_T3	0.165233	0.088513	0.013984	0.081919
CUST_117_PI425211535	5bias_TS_02_C5	-0.025667	0.358529	0.880575	0.924054
CUST_117_PI425212603	5bias_TS_50_E7	-0.074572	0.577855	0.78725	0.86308
CUST_1170_PI425129478	TG_302_A16	0.101622	0.07757	0.04284	0.161829
CUST_1170_PI425129481	TS_14_H1	-0.000144	0.000322	0.373901	0.538467
CUST_1170_PI425211535	5bias_TS_14_H1	-0.000144	0.000322	0.373901	0.538467
CUST_1171_PI425129478	TG_302_A14	0.162297	0.044447	0.001225	0.031108
CUST_1171_PI425129481	TS_14_H3	-0.329594	0.367482	0.115386	0.311223
CUST_1171_PI425211535	5bias_TS_14_H3	-0.36207	0.339439	0.075565	0.235538
CUST_1172_PI425129478	TG_302_A8	0.135158	0.059027	0.006886	0.056398
CUST_1172_PI425129481	TS_14_G11	-0.469801	0.129125	0.001242	0.031364
CUST_1172_PI425211535	5bias_TS_14_G11	-0.456452	0.130611	0.001447	0.03282
CUST_1173_PI425129478	TG_302_O24	0.0418	0.058932	0.187917	0.424816
CUST_1173_PI425129481	TS_14_H2	-0.361315	0.327271	0.069046	0.221128
CUST_1173_PI425211535	5bias_TS_14_H2	-0.42231	0.291811	0.031793	0.133488
CUST_1174_PI425129478	TG_302_C2	0.106903	0.153505	0.194409	0.432719
CUST_1174_PI425129481	TS_14_H4	-0.000144	0.000322	0.373901	0.538467
CUST_1174_PI425211535	5bias_TS_14_H4	-0.048939	0.109028	0.372319	0.538467
CUST_1175_PI425129478	TG_302_C6	0.10279	0.122276	0.133322	0.345832
CUST_1175_PI425129481	TS_14_H5	0.030229	0.067997	0.376457	0.538467
CUST_1175_PI425211535	5bias_TS_14_H5	-0.000144	0.000322	0.373901	0.538467
CUST_1176_PI425129478	TG_302_A20	0.028064	0.107914	0.592091	0.721538
CUST_1176_PI425129481	TS_16_H12	0.010113	0.185338	0.908774	0.944211
CUST_1176_PI425211535	5bias_TS_16_H12	-0.043619	0.231842	0.695593	0.798172
CUST_1177_PI425129478	TG_302_C4	-0.038364	0.11502	0.497217	0.641111
CUST_1177_PI425129481	TS_16_H11	-0.498524	0.258091	0.012456	0.076933
CUST_1177_PI425211535	5bias_TS_16_H11	-0.412534	0.340684	0.053667	0.18685
CUST_1178_PI425129478	TG_302_A18	0.029429	0.119158	0.610178	0.73578
CUST_1178_PI425129481	TS_16_A6	-0.660327	0.471338	0.035095	0.142882
CUST_1178_PI425211535	5bias_TS_16_A6	-0.705914	0.349858	0.010726	0.070259
CUST_1179_PI425129478	TG_302_C12	0.197743	0.102445	0.012485	0.076981
CUST_1179_PI425129481	TS_16_A4	-0.321235	0.333265	0.097395	0.277987
CUST_1179_PI425211535	5bias_TS_16_A4	-0.321761	0.303948	0.077063	0.23832
CUST_118_PI425129478	TG_301_E9	0.1347	0.119508	0.065334	0.213411
CUST_118_PI425129481	TS_02_C11	-0.414513	0.207184	0.011043	0.071447
CUST_118_PI425129486	Soldier_C08_T3	-0.129868	0.095871	0.038818	0.152225
CUST_118_PI425211535	5bias_TS_02_C11	-0.559153	0.199739	0.003322	0.042106
CUST_118_PI425212603	5bias_TS_50_E8	-0.240735	0.419844	0.269058	0.524423
CUST_1180_PI425129478	TG_302_C14	0.089176	0.117857	0.165921	0.397316
CUST_1180_PI425129481	TS_16_A5	0.003005	0.007129	0.399286	0.555707
CUST_1180_PI425211535	5bias_TS_16_A5	0.067193	0.095672	0.191402	0.429305
CUST_1181_PI425129478	TG_302_C18	0.085842	0.07147	0.054902	0.189478
CUST_1181_PI425129481	TS_16_A1	0.141904	0.193346	0.176114	0.41279
CUST_1181_PI425211535	5bias_TS_16_A1	0.14389	0.155237	0.106911	0.296231
CUST_1182_PI425129478	TG_302_C16	0.12158	0.132617	0.109694	0.301133
CUST_1182_PI425129481	TS_16_A2	-0.088541	0.471018	0.695841	0.798399
CUST_1182_PI425211535	5bias_TS_16_A2	-0.121218	0.565591	0.656793	0.769698
CUST_1183_PI425129478	TG_302_A22	0.059958	0.052012	0.061477	0.204633
CUST_1183_PI425129481	TS_16_A3	-0.079315	0.655733	0.800184	0.872218
CUST_1183_PI425211535	5bias_TS_16_A3	-0.244194	0.961239	0.600369	0.728243
CUST_1184_PI425129478	TG_302_C10	0.195776	0.087699	0.007535	0.058824
CUST_1184_PI425129481	TS_16_A10	0.109687	0.184145	0.25371	0.508227
CUST_1184_PI425211535	5bias_TS_16_A10	0.136369	0.169404	0.146236	0.368126
CUST_1185_PI425129478	TG_302_C8	0.152329	0.068926	0.007807	0.059616
CUST_1185_PI425129481	TS_16_A9	0.031546	0.096547	0.505502	0.648552
CUST_1185_PI425211535	5bias_TS_16_A9	-0.000144	0.000322	0.373901	0.538467
CUST_1186_PI425129478	TG_302_A24	0.078105	0.1251	0.235192	0.485974
CUST_1186_PI425129481	TS_16_A11	-0.807512	0.617075	0.042979	0.162198
CUST_1186_PI425211535	5bias_TS_16_A11	-0.873173	0.623841	0.035193	0.14311
CUST_1187_PI425129478	TG_302_E4	0.174808	0.058147	0.00255	0.039483
CUST_1187_PI425129481	TS_16_A8	-0.341189	0.472051	0.181359	0.417365
CUST_1187_PI425211535	5bias_TS_16_A8	-0.230611	0.418566	0.285429	0.538467
CUST_1188_PI425129478	TG_302_E12	0.031324	0.238235	0.78338	0.860335
CUST_1188_PI425129481	TS_16_A12	-0.220102	0.245591	0.115589	0.311609
CUST_1188_PI425211535	5bias_TS_16_A12	-0.080302	0.118436	0.20408	0.44563
CUST_1189_PI425129478	TG_302_E14	0.00859	0.193344	0.925643	0.954069
CUST_1189_PI425129481	TS_16_A7	-0.529517	0.940473	0.276502	0.533123
CUST_1189_PI425211535	5bias_TS_16_A7	-0.539125	1.02258	0.303772	0.538467
CUST_119_PI425129478	TG_301_E15	0.295614	0.258308	0.062704	0.207139
CUST_119_PI425129481	TS_02_C12	-0.134444	0.437319	0.529597	0.668676
CUST_119_PI425129486	Soldier_C09_T3	-0.133948	0.109248	0.051819	0.182399
CUST_119_PI425211535	5bias_TS_02_C12	-0.151616	0.431707	0.476179	0.623225
CUST_119_PI425212603	5bias_TS_50_E12	-0.034154	0.076371	0.373901	0.538467
CUST_1190_PI425129478	TG_302_E22	0.309608	0.091747	0.001652	0.034635
CUST_1190_PI425129481	TS_16_B1	-0.155166	0.446119	0.480162	0.626044
CUST_1190_PI425211535	5bias_TS_16_B1	-0.052844	0.437597	0.800498	0.872439
CUST_1191_PI425129478	TG_302_E20	0.032199	0.156146	0.668687	0.778325
CUST_1191_PI425129481	TS_16_B2	-0.334257	0.695543	0.34306	0.538467
CUST_1191_PI425211535	5bias_TS_16_B2	-0.341339	0.690274	0.33087	0.538467
CUST_1192_PI425129478	TG_302_G2	0.096284	0.137784	0.193189	0.431486
CUST_1192_PI425129481	TS_16_B8	0.079451	0.17806	0.374874	0.538467
CUST_1192_PI425211535	5bias_TS_16_B8	0.15745	0.352471	0.374392	0.538467
CUST_1193_PI425129478	TG_302_E24	0.250289	0.161646	0.025764	0.116672
CUST_1193_PI425129481	TS_16_B5	-0.000144	0.000322	0.373901	0.538467
CUST_1193_PI425211535	5bias_TS_16_B5	-0.000144	0.000322	0.373901	0.538467
CUST_1194_PI425129478	TG_302_C22	0.166682	0.058251	0.003064	0.041136
CUST_1194_PI425129481	TS_16_B4	-0.625327	0.479326	0.043366	0.163191
CUST_1194_PI425211535	5bias_TS_16_B4	-0.409361	0.390021	0.078777	0.241838
CUST_1195_PI425129478	TG_302_C24	0.263518	0.11707	0.007317	0.05798
CUST_1195_PI425129481	TS_16_B3	0.000304	0.066951	0.992376	0.995632
CUST_1195_PI425211535	5bias_TS_16_B3	-0.027091	0.043951	0.240184	0.492583
CUST_1196_PI425129478	TG_302_E2	0.123691	0.084479	0.030674	0.130152
CUST_1196_PI425129481	TS_16_B7	0.198874	0.200472	0.09079	0.265992
CUST_1196_PI425211535	5bias_TS_16_B7	0.238349	0.2215	0.073862	0.231138
CUST_1197_PI425129478	TG_302_E16	0.283517	0.100326	0.003209	0.041876
CUST_1197_PI425129481	TS_16_B6	-0.648337	0.236443	0.003586	0.043284
CUST_1197_PI425211535	5bias_TS_16_B6	-0.648631	0.23355	0.003421	0.042679
CUST_1198_PI425129478	TG_302_E10	0.020485	0.05204	0.428467	0.581422
CUST_1198_PI425129481	TS_16_C2	0.109059	0.163947	0.211106	0.45409
CUST_1198_PI425211535	5bias_TS_16_C2	-0.000144	0.000322	0.373901	0.538467
CUST_1199_PI425129478	TG_302_G4	0.405368	0.086801	0.000475	0.022237
CUST_1199_PI425129481	TS_16_C4	-0.659965	0.823186	0.147486	0.370317
CUST_1199_PI425211535	5bias_TS_16_C4	-0.678175	0.869819	0.156216	0.383259
CUST_12_PI425129478	TG_00_C4	0.343895	0.062288	0.000247	0.019804
CUST_12_PI425129481	TS_00_H12	0.114331	0.038724	0.002728	0.039705
CUST_12_PI425129486	Random_A12_T3	0.078079	0.13167	0.2555	0.510062
CUST_12_PI425211535	5bias_TS_00_H12	0.106915	0.03675	0.002881	0.04021
CUST_12_PI425212603	5bias_TS_55_A7	-0.225599	0.405501	0.28141	0.538467
CUST_120_PI425129478	TG_301_E23	0.260603	0.088983	0.002811	0.03997
CUST_120_PI425129481	TS_02_C8	-0.359977	0.423751	0.130308	0.339984
CUST_120_PI425129486	Soldier_C10_T3	0.010983	0.113892	0.839827	0.898811
CUST_120_PI425211535	5bias_TS_02_C8	-0.396439	0.393965	0.087634	0.259735
CUST_120_PI425212603	5bias_TS_50_F2	0.148645	0.325121	0.364421	0.538467
CUST_1200_PI425129478	TG_302_G6	0.070984	0.025393	0.00334	0.042196
CUST_1200_PI425129481	TS_16_C3	-0.000144	0.000322	0.373901	0.538467
CUST_1200_PI425211535	5bias_TS_16_C3	0.117049	0.214693	0.289783	0.538467
CUST_1201_PI425129478	TG_302_E18	0.101602	0.163225	0.236359	0.487427
CUST_1201_PI425129481	TS_16_B11	0.203074	0.079014	0.004544	0.047178
CUST_1201_PI425211535	5bias_TS_16_B11	0.037024	0.252742	0.759671	0.843894
CUST_1202_PI425129478	TG_302_E8	0.130892	0.158288	0.138142	0.354036
CUST_1202_PI425129481	TS_16_C1	-0.035174	0.366068	0.840391	0.899058
CUST_1202_PI425211535	5bias_TS_16_C1	-0.012515	0.377604	0.944479	0.966026
CUST_1203_PI425129478	TG_302_I20	-0.026951	0.128133	0.662625	0.774294
CUST_1203_PI425129481	TS_16_C5	-0.016659	0.03725	0.373901	0.538467
CUST_1203_PI425211535	5bias_TS_16_C5	-0.002033	0.004546	0.373901	0.538467
CUST_1204_PI425129478	TG_302_G20	0.197949	0.10788	0.014817	0.084263
CUST_1204_PI425129481	TS_16_B9	0.08089	0.152509	0.301255	0.538467
CUST_1204_PI425211535	5bias_TS_16_B9	0.194254	0.631585	0.529422	0.668509
CUST_1205_PI425129478	TG_302_I18	-0.319579	0.462156	0.196949	0.436398
CUST_1205_PI425129481	TS_16_B12	-0.18186	0.248614	0.177249	0.414387
CUST_1205_PI425211535	5bias_TS_16_B12	-0.199771	0.303137	0.214593	0.458893
CUST_1206_PI425129478	TG_302_I12	0.355245	0.201286	0.016869	0.0902
CUST_1206_PI425129481	TS_16_B10	-0.000144	0.000322	0.373901	0.538467
CUST_1206_PI425211535	5bias_TS_16_B10	-0.000144	0.000322	0.373901	0.538467
CUST_1207_PI425129478	TG_302_K6	0.163292	0.10357	0.02433	0.112551
CUST_1207_PI425129481	TS_16_C7	-0.018357	0.170393	0.821476	0.886829
CUST_1207_PI425211535	5bias_TS_16_C7	0.017652	0.159791	0.817058	0.884187
CUST_1208_PI425129478	TG_302_I10	0.294393	0.042255	9.9e-05	0.019804
CUST_1208_PI425129481	TS_16_C8	-0.247132	0.182657	0.038958	0.152659
CUST_1208_PI425211535	5bias_TS_16_C8	-0.162845	0.241788	0.206531	0.448415
CUST_1209_PI425129478	TG_302_G24	0.341055	0.468672	0.179024	0.41533
CUST_1209_PI425129481	TS_16_D2	-0.458563	0.531148	0.125744	0.332231
CUST_1209_PI425211535	5bias_TS_16_D2	-0.291791	0.413642	0.189846	0.427483
CUST_121_PI425129478	TG_301_E19	0.132121	0.072717	0.015314	0.085511
CUST_121_PI425129481	TS_02_C10	0.052928	0.118753	0.375361	0.538467
CUST_121_PI425129486	Soldier_C11_T3	0.130805	0.095272	0.037291	0.148433
CUST_121_PI425211535	5bias_TS_02_C10	-0.001024	0.158376	0.989158	0.993917
CUST_121_PI425212603	5bias_TS_50_F9	0.27436	0.205385	0.040457	0.156318
CUST_1210_PI425129478	TG_302_G16	0.235505	0.117661	0.011027	0.071372
CUST_1210_PI425129481	TS_16_C12	-0.583956	0.529104	0.069104	0.221228
CUST_1210_PI425211535	5bias_TS_16_C12	-0.62919	0.635422	0.091205	0.2669
CUST_1211_PI425129478	TG_302_I4	0.181584	0.060886	0.002627	0.039696
CUST_1211_PI425129481	TS_16_D1	-0.39267	0.776953	0.321608	0.538467
CUST_1211_PI425211535	5bias_TS_16_D1	-0.400865	0.753492	0.299985	0.538467
CUST_1212_PI425129478	TG_302_I2	0.169881	0.147507	0.061637	0.204948
CUST_1212_PI425129481	TS_16_C11	0.045293	0.30571	0.757056	0.84201
CUST_1212_PI425211535	5bias_TS_16_C11	0.052083	0.304684	0.721729	0.817048
CUST_1213_PI425129478	TG_302_I22	-0.017717	0.104421	0.72368	0.818704
CUST_1213_PI425129481	TS_16_D4	0.098881	0.595451	0.729229	0.822852
CUST_1213_PI425211535	5bias_TS_16_D4	0.041351	0.574314	0.879899	0.923674
CUST_1214_PI425129478	TG_302_I8	0.192447	0.101319	0.013187	0.079401
CUST_1214_PI425129481	TS_16_C9	0.033843	0.178667	0.693676	0.796902
CUST_1214_PI425211535	5bias_TS_16_C9	0.043474	0.184887	0.626838	0.748752
CUST_1215_PI425129478	TG_302_I6	0.15973	0.123895	0.044885	0.166667
CUST_1215_PI425129481	TS_16_C10	0.117292	0.189679	0.238931	0.491059
CUST_1215_PI425211535	5bias_TS_16_C10	-0.000144	0.000322	0.373901	0.538467
CUST_1216_PI425129478	TG_302_I16	0.192511	0.029085	0.000121	0.019804
CUST_1216_PI425129481	TS_16_D3	0.073204	0.107527	0.202589	0.443914
CUST_1216_PI425211535	5bias_TS_16_D3	-0.144138	0.233189	0.239093	0.491204
CUST_1217_PI425129478	TG_302_G10	0.322283	0.087371	0.001178	0.030713
CUST_1217_PI425129481	TS_16_D6	-0.011071	0.403462	0.954018	0.971799
CUST_1217_PI425211535	5bias_TS_16_D6	0.035176	0.375903	0.844483	0.901482
CUST_1218_PI425129478	TG_302_G8	-0.058695	0.528009	0.815935	0.883474
CUST_1218_PI425129481	TS_16_D5	-0.066185	0.34534	0.690323	0.794849
CUST_1218_PI425211535	5bias_TS_16_D5	-0.048228	0.36253	0.78092	0.858819
CUST_1219_PI425129478	TG_302_K4	0.061095	0.48722	0.793082	0.867179
CUST_1219_PI425129481	TS_16_D7	-0.036261	0.081082	0.373901	0.538467
CUST_1219_PI425211535	5bias_TS_16_D7	0.218406	0.28907	0.1664	0.398028
CUST_122_PI425129478	TG_301_E21	-0.04406	0.100643	0.383051	0.54189
CUST_122_PI425129481	TS_02_C6	-0.507764	0.444924	0.063179	0.208249
CUST_122_PI425129486	Soldier_C12_T3	-0.04285	0.175214	0.613558	0.738211
CUST_122_PI425211535	5bias_TS_02_C6	-0.542957	0.468107	0.060453	0.202769
CUST_122_PI425212603	5bias_TS_50_F7	-0.345689	0.233036	0.029461	0.12667
CUST_1220_PI425129478	TG_302_G22	-0.000144	0.000322	0.373901	0.538467
CUST_1220_PI425129481	TS_16_D9	0.063761	0.314973	0.674262	0.782826
CUST_1220_PI425211535	5bias_TS_16_D9	0.078362	0.259179	0.53607	0.674237
CUST_1221_PI425129478	TG_302_M6	0.116952	0.159534	0.176509	0.413333
CUST_1221_PI425129481	TS_16_D8	0.038741	0.086627	0.373901	0.538467
CUST_1221_PI425211535	5bias_TS_16_D8	-0.056786	0.190836	0.542217	0.679866
CUST_1222_PI425129478	TG_302_M14	0.131013	0.124889	0.078885	0.241957
CUST_1222_PI425129481	TS_16_D10	-0.02648	0.240967	0.81799	0.884873
CUST_1222_PI425211535	5bias_TS_16_D10	-0.009052	0.286163	0.947006	0.967586
CUST_1223_PI425129478	TG_302_M12	-0.009655	0.122841	0.869032	0.916787
CUST_1223_PI425129481	TS_16_D12	-0.11646	0.402603	0.552991	0.689032
CUST_1223_PI425211535	5bias_TS_16_D12	-0.111222	0.439961	0.602084	0.72948
CUST_1224_PI425129478	TG_302_M24	0.13757	0.138663	0.09077	0.265992
CUST_1224_PI425129481	TS_16_E1	0.00751	0.465958	0.972978	0.983538
CUST_1224_PI425211535	5bias_TS_16_E1	-0.04137	0.483711	0.85765	0.909354
CUST_1225_PI425129478	TG_302_M4	0.136811	0.138709	0.09209	0.26859
CUST_1225_PI425129481	TS_16_D11	-0.252137	0.559473	0.370597	0.538467
CUST_1225_PI425211535	5bias_TS_16_D11	-0.357002	0.489513	0.178274	0.414935
CUST_1226_PI425129478	TG_302_M8	-1.14585	1.10681	0.081588	0.247365
CUST_1226_PI425129481	TS_16_E7	-0.089115	0.37142	0.620061	0.743324
CUST_1226_PI425211535	5bias_TS_16_E7	-0.084853	0.409064	0.666885	0.777128
CUST_1227_PI425129478	TG_302_M10	0.092203	0.122038	0.166407	0.398028
CUST_1227_PI425129481	TS_16_E3	-1.02829	0.468151	0.007978	0.060374
CUST_1227_PI425211535	5bias_TS_16_E3	-0.793365	0.369115	0.00861	0.061939
CUST_1228_PI425129478	TG_302_K10	0.119032	0.310992	0.440319	0.59159
CUST_1228_PI425129481	TS_16_E6	-0.420748	0.402972	0.079839	0.24385
CUST_1228_PI425211535	5bias_TS_16_E6	-0.407989	0.396255	0.082731	0.249621
CUST_1229_PI425129478	TG_302_M20	0.106305	0.08426	0.047776	0.173641
CUST_1229_PI425129481	TS_16_E4	-0.335476	0.36733	0.110672	0.302866
CUST_1229_PI425211535	5bias_TS_16_E4	-0.337884	0.360738	0.10431	0.291539
CUST_123_PI425129478	TG_301_E17	0.215758	0.148567	0.031454	0.132456
CUST_123_PI425129481	TS_02_D4	-0.000144	0.000322	0.373901	0.538467
CUST_123_PI425129486	Soldier_D01_T3	-0.010276	0.065433	0.743176	0.832918
CUST_123_PI425211535	5bias_TS_02_D4	-0.00034	0.000475	0.184376	0.42074
CUST_123_PI425212603	5bias_TS_50_F8	-0.171783	0.520699	0.501633	0.645273
CUST_1230_PI425129478	TG_302_K12	0.175833	0.045653	0.000999	0.028879
CUST_1230_PI425129481	TS_16_E9	-0.000144	0.000322	0.373901	0.538467
CUST_1230_PI425211535	5bias_TS_16_E9	-0.04714	0.32985	0.765294	0.848202
CUST_1231_PI425129478	TG_302_K22	0.098312	0.053926	0.015142	0.085014
CUST_1231_PI425129481	TS_16_E8	0.10151	0.401831	0.602336	0.729673
CUST_1231_PI425211535	5bias_TS_16_E8	0.166886	0.099058	0.019652	0.09858
CUST_1232_PI425129478	TG_302_M16	0.21451	0.209157	0.083553	0.251184
CUST_1232_PI425129481	TS_16_E5	-0.277751	0.530349	0.306575	0.538467
CUST_1232_PI425211535	5bias_TS_16_E5	-0.22004	0.370959	0.255382	0.510062
CUST_1233_PI425129478	TG_302_K18	0.160952	0.090878	0.016674	0.089428
CUST_1233_PI425129481	TS_16_E12	-0.59179	0.238082	0.00513	0.049634
CUST_1233_PI425211535	5bias_TS_16_E12	-0.624477	0.22733	0.003562	0.04324
CUST_1234_PI425129478	TG_302_M22	0.023461	0.052863	0.377193	0.538467
CUST_1234_PI425129481	TS_16_E10	0.214993	0.194548	0.068869	0.220876
CUST_1234_PI425211535	5bias_TS_16_E10	0.224792	0.194769	0.061279	0.204147
CUST_1235_PI425129478	TG_302_K20	0.183195	0.051173	0.001321	0.032233
CUST_1235_PI425129481	TS_16_F3	-1.35042	0.606738	0.007614	0.058921
CUST_1235_PI425211535	5bias_TS_16_F3	-1.31203	0.632969	0.009771	0.066697
CUST_1236_PI425129478	TG_302_M18	0.203504	0.047026	0.000638	0.024239
CUST_1236_PI425129481	TS_16_F4	-0.833403	0.340839	0.005443	0.050608
CUST_1236_PI425211535	5bias_TS_16_F4	-0.984596	0.353366	0.00338	0.042465
CUST_1237_PI425129478	TG_302_O8	0.064305	0.122511	0.305634	0.538467
CUST_1237_PI425129481	TS_16_F2	0.234608	0.183713	0.046137	0.169723
CUST_1237_PI425211535	5bias_TS_16_F2	0.282164	0.183214	0.026205	0.117753
CUST_1238_PI425129478	TG_302_O2	0.118221	0.16944	0.193744	0.432034
CUST_1238_PI425129481	TS_16_F8	-0.045234	0.42297	0.822755	0.88754
CUST_1238_PI425211535	5bias_TS_16_F8	-0.0364	0.427527	0.858284	0.909734
CUST_1239_PI425129478	TG_302_P18	0.159054	0.127993	0.049884	0.178421
CUST_1239_PI425129481	TS_16_F9	-0.317112	0.522418	0.246215	0.499758
CUST_1239_PI425211535	5bias_TS_16_F9	-0.260602	0.623395	0.402833	0.558726
CUST_124_PI425129478	TG_301_I5	-0.027421	0.187619	0.760202	0.844245
CUST_124_PI425129481	TS_02_D2	-0.540567	0.295004	0.014885	0.084426
CUST_124_PI425129486	Soldier_D02_T3	0.10929	0.12297	0.117812	0.316032
CUST_124_PI425211535	5bias_TS_02_D2	-0.556267	0.283594	0.011819	0.074448
CUST_124_PI425212603	5bias_TS_50_F5	0.236756	0.341729	0.196262	0.43549
CUST_1240_PI425129478	TG_302_B6	-0.225838	0.246681	0.110048	0.301816
CUST_1240_PI425129481	TS_16_F5	-0.471071	0.383304	0.051476	0.181884
CUST_1240_PI425211535	5bias_TS_16_F5	-0.456833	0.364324	0.048621	0.175576
CUST_1241_PI425129478	TG_302_B4	0.177044	0.323124	0.28772	0.538467
CUST_1241_PI425129481	TS_16_F6	-0.047039	0.472736	0.834825	0.895833
CUST_1241_PI425211535	5bias_TS_16_F6	-0.211665	0.644032	0.503162	0.646722
CUST_1242_PI425129478	TG_302_B2	0.147298	0.055825	0.004129	0.045832
CUST_1242_PI425129481	TS_16_F7	-0.221584	0.408207	0.291594	0.538467
CUST_1242_PI425211535	5bias_TS_16_F7	-0.083978	0.350974	0.620989	0.74419
CUST_1243_PI425129478	TG_302_B14	0.010196	0.03533	0.553875	0.689704
CUST_1243_PI425129481	TS_16_F10	-0.497721	0.165776	0.002563	0.039483
CUST_1243_PI425211535	5bias_TS_16_F10	-0.386102	0.363689	0.076498	0.237364
CUST_1244_PI425129478	TG_302_B24	0.044433	0.090334	0.333133	0.538467
CUST_1244_PI425129481	TS_16_F11	-0.230483	0.278406	0.137802	0.353454
CUST_1244_PI425211535	5bias_TS_16_F11	-0.322155	0.407426	0.15178	0.376307
CUST_1245_PI425129478	TG_302_B12	0.46804	0.080305	0.0002	0.019804
CUST_1245_PI425129481	TS_16_G4	-0.39007	0.871628	0.373608	0.538467
CUST_1245_PI425211535	5bias_TS_16_G4	-0.415414	0.857557	0.339655	0.538467
CUST_1246_PI425129478	TG_302_B20	0.073784	0.352978	0.664533	0.77565
CUST_1246_PI425129481	TS_16_G5	-0.000144	0.000322	0.373901	0.538467
CUST_1246_PI425211535	5bias_TS_16_G5	-0.000144	0.000322	0.373901	0.538467
CUST_1247_PI425129478	TG_302_B18	0.345489	0.129495	0.003965	0.04517
CUST_1247_PI425129481	TS_16_G1	-0.219947	0.535689	0.410517	0.565745
CUST_1247_PI425211535	5bias_TS_16_G1	-0.219961	0.507547	0.387387	0.545231
CUST_1248_PI425129478	TG_302_B22	0.466187	0.291176	0.023167	0.108985
CUST_1248_PI425129481	TS_16_G3	-0.000144	0.000322	0.373901	0.538467
CUST_1248_PI425211535	5bias_TS_16_G3	-0.000144	0.000322	0.373901	0.538467
CUST_1249_PI425129478	TG_302_B16	0.101251	0.061626	0.021319	0.103797
CUST_1249_PI425129481	TS_16_G2	-1.02285	0.484731	0.009182	0.06444
CUST_1249_PI425211535	5bias_TS_16_G2	-1.0158	0.467153	0.008266	0.060908
CUST_125_PI425129478	TG_301_G17	0.057752	0.058173	0.090622	0.26591
CUST_125_PI425129481	TS_02_D3	-0.283892	0.571643	0.329044	0.538467
CUST_125_PI425129486	Soldier_D03_T3	0.253931	0.147224	0.018198	0.09398
CUST_125_PI425211535	5bias_TS_02_D3	-0.229032	0.588822	0.433514	0.585853
CUST_125_PI425212603	5bias_TS_50_F10	-0.031229	0.06983	0.373901	0.538467
CUST_1250_PI425129478	TG_302_B8	0.144081	0.25217	0.2705	0.526387
CUST_1250_PI425129481	TS_16_F12	-0.184978	0.112525	0.021282	0.103649
CUST_1250_PI425211535	5bias_TS_16_F12	-0.204287	0.108507	0.013587	0.080709
CUST_1251_PI425129478	TG_302_B10	0.063922	0.082889	0.159722	0.388832
CUST_1251_PI425129481	TS_16_G7	-0.080226	0.235683	0.488968	0.633953
CUST_1251_PI425211535	5bias_TS_16_G7	-0.079664	0.207375	0.438772	0.590115
CUST_1252_PI425129478	TG_302_D20	0.061157	0.040927	0.028801	0.125035
CUST_1252_PI425129481	TS_16_G6	-0.683772	0.275062	0.005128	0.049634
CUST_1252_PI425211535	5bias_TS_16_G6	-0.730106	0.269522	0.00375	0.044058
CUST_1253_PI425129478	TG_302_D8	0.056635	0.070786	0.148113	0.371073
CUST_1253_PI425129481	TS_16_G11	-0.000144	0.000322	0.373901	0.538467
CUST_1253_PI425211535	5bias_TS_16_G11	-0.000144	0.000322	0.373901	0.538467
CUST_1254_PI425129478	TG_302_D10	0.260772	0.087908	0.00268	0.039705
CUST_1254_PI425129481	TS_16_G10	0.028037	0.316147	0.852477	0.906556
CUST_1254_PI425211535	5bias_TS_16_G10	0.051782	0.309934	0.727666	0.821796
CUST_1255_PI425129478	TG_302_D14	-0.490228	0.304959	0.02287	0.10791
CUST_1255_PI425129481	TS_16_G12	-0.000144	0.000322	0.373901	0.538467
CUST_1255_PI425211535	5bias_TS_16_G12	0.04939	0.110843	0.375466	0.538467
CUST_1256_PI425129478	TG_302_D12	0.345409	0.192154	0.015871	0.087182
CUST_1256_PI425129481	TS_16_G9	-0.149369	0.56276	0.58478	0.715465
CUST_1256_PI425211535	5bias_TS_16_G9	-0.118991	0.636495	0.697394	0.799539
CUST_1257_PI425129478	TG_302_D2	-0.086129	0.274014	0.520902	0.661298
CUST_1257_PI425129481	TS_16_G8	-0.435101	0.351361	0.050383	0.179472
CUST_1257_PI425211535	5bias_TS_16_G8	-0.437794	0.373226	0.05862	0.19863
CUST_1258_PI425129478	TG_302_D18	0.142658	0.057328	0.005109	0.049611
CUST_1258_PI425129481	TS_16_H2	-0.071311	0.14568	0.335196	0.538467
CUST_1258_PI425211535	5bias_TS_16_H2	-0.069336	0.164674	0.39976	0.556062
CUST_1259_PI425129478	TG_302_D16	0.203952	0.110572	0.014559	0.083501
CUST_1259_PI425129481	TS_16_H5	-0.062978	0.216656	0.551142	0.687417
CUST_1259_PI425211535	5bias_TS_16_H5	-0.040629	0.2354	0.719196	0.814861
CUST_126_PI425129478	TG_301_G11	0.012744	0.047961	0.584396	0.715337
CUST_126_PI425129481	TS_02_D5	-0.188128	0.143844	0.043051	0.162361
CUST_126_PI425129486	Soldier_D04_T3	-1.06611	0.749684	0.03354	0.138453
CUST_126_PI425211535	5bias_TS_02_D5	-0.140038	0.206966	0.204836	0.446521
CUST_126_PI425212603	5bias_TS_50_F11	0.207613	0.281436	0.174385	0.410015
CUST_1260_PI425129478	TG_302_D22	0.077842	0.066478	0.058904	0.199315
CUST_1260_PI425129481	TS_16_H3	-0.386375	0.61	0.229625	0.478463
CUST_1260_PI425211535	5bias_TS_16_H3	-0.320735	0.554357	0.26541	0.520729
CUST_1261_PI425129478	TG_302_D6	0.096956	0.277014	0.477584	0.624441
CUST_1261_PI425129481	TS_16_H4	-0.135779	0.554543	0.613151	0.737891
CUST_1261_PI425211535	5bias_TS_16_H4	-0.066555	0.325005	0.670791	0.780062
CUST_1262_PI425129478	TG_302_F20	-0.169641	0.534681	0.517212	0.658585
CUST_1262_PI425129481	TS_16_H8	-0.000144	0.000322	0.373901	0.538467
CUST_1262_PI425211535	5bias_TS_16_H8	-0.000144	0.000322	0.373901	0.538467
CUST_1263_PI425129478	TG_302_F14	0.124002	0.066412	0.013973	0.081888
CUST_1263_PI425129481	TS_16_H9	-1.21745	0.548109	0.007669	0.059105
CUST_1263_PI425211535	5bias_TS_16_H9	-1.33099	0.619472	0.00862	0.061972
CUST_1264_PI425129478	TG_302_F12	0.008346	0.07276	0.810232	0.879577
CUST_1264_PI425129481	TS_16_H6	-0.000144	0.000322	0.373901	0.538467
CUST_1264_PI425211535	5bias_TS_16_H6	-0.000144	0.000322	0.373901	0.538467
CUST_1265_PI425129478	TG_302_H2	0.168259	0.07788	0.008455	0.061289
CUST_1265_PI425129481	TS_15_H9	0.096529	0.245096	0.428236	0.58126
CUST_1265_PI425211535	5bias_TS_15_H9	0.08314	0.250777	0.499659	0.64347
CUST_1266_PI425129478	TG_302_F2	0.287612	0.08959	0.001994	0.036886
CUST_1266_PI425129481	TS_15_H10	-0.386386	0.427958	0.113645	0.308376
CUST_1266_PI425211535	5bias_TS_15_H10	-0.391374	0.33638	0.059945	0.201622
CUST_1267_PI425129478	TG_302_F16	0.06786	0.082142	0.138421	0.354464
CUST_1267_PI425129481	TS_15_A11	0.030735	0.408252	0.874483	0.920197
CUST_1267_PI425211535	5bias_TS_15_A11	0.142965	0.51536	0.56865	0.702324
CUST_1268_PI425129478	TG_302_F18	-0.068327	0.336959	0.673757	0.782472
CUST_1268_PI425129481	TS_15_A10	0.022585	0.050906	0.37732	0.538467
CUST_1268_PI425211535	5bias_TS_15_A10	0.139379	0.312064	0.374456	0.538467
CUST_1269_PI425129478	TG_302_F22	0.063014	0.103834	0.246302	0.499758
CUST_1269_PI425129481	TS_15_A6	-0.920649	0.385916	0.005948	0.05234
CUST_1269_PI425211535	5bias_TS_15_A6	-0.938342	0.411827	0.007008	0.056919
CUST_127_PI425129478	TG_301_G23	0.399258	0.106422	0.001105	0.02993
CUST_127_PI425129481	TS_02_D7	-0.100864	0.192121	0.305544	0.538467
CUST_127_PI425129486	Soldier_D05_T3	-0.130188	0.129294	0.087497	0.259474
CUST_127_PI425211535	5bias_TS_02_D7	-0.077808	0.231073	0.493376	0.63736
CUST_127_PI425212603	5bias_TS_50_G3	0.115032	0.198311	0.264369	0.51966
CUST_1270_PI425129478	TG_302_H18	0.052842	0.073297	0.182247	0.418384
CUST_1270_PI425129481	TS_15_A2	0.025229	0.056414	0.373901	0.538467
CUST_1270_PI425211535	5bias_TS_15_A2	-0.000144	0.000322	0.373901	0.538467
CUST_1271_PI425129478	TG_302_H16	-0.09913	0.281676	0.475324	0.622567
CUST_1271_PI425129481	TS_15_A8	0.031766	0.121802	0.591081	0.720697
CUST_1271_PI425211535	5bias_TS_15_A8	0.016546	0.323896	0.914562	0.948375
CUST_1272_PI425129478	TG_302_H24	0.480799	0.220317	0.008162	0.060659
CUST_1272_PI425129481	TS_15_H12	-0.593056	0.473995	0.048924	0.176349
CUST_1272_PI425211535	5bias_TS_15_H12	-0.528048	0.435957	0.053625	0.186788
CUST_1273_PI425129478	TG_302_J12	0.29432	0.249897	0.05797	0.197128
CUST_1273_PI425129481	TS_15_H11	0.052753	0.229804	0.634791	0.75453
CUST_1273_PI425211535	5bias_TS_15_H11	0.086574	0.145571	0.254339	0.508969
CUST_1274_PI425129478	TG_302_J18	-0.022701	0.108233	0.663498	0.774729
CUST_1274_PI425129481	TS_15_A7	0.156488	0.264553	0.256496	0.511336
CUST_1274_PI425211535	5bias_TS_15_A7	0.160531	0.228987	0.192047	0.429744
CUST_1275_PI425129478	TG_302_J16	0.179671	0.081957	0.008032	0.060465
CUST_1275_PI425129481	TS_15_A4	-0.109269	0.514138	0.659411	0.771846
CUST_1275_PI425211535	5bias_TS_15_A4	-0.131229	0.523752	0.605194	0.731671
CUST_1276_PI425129478	TG_302_J6	-0.167894	0.388646	0.388759	0.546087
CUST_1276_PI425129481	TS_15_A9	-0.278321	0.675291	0.408894	0.564102
CUST_1276_PI425211535	5bias_TS_15_A9	-0.241953	0.707662	0.487168	0.63235
CUST_1277_PI425129478	TG_302_J22	0.171256	0.090481	0.013346	0.079851
CUST_1277_PI425129481	TS_15_A12	-1.4779	0.43334	0.001588	0.034334
CUST_1277_PI425211535	5bias_TS_15_A12	-1.57416	0.434002	0.001257	0.03154
CUST_1278_PI425129478	TG_302_2	0.313023	0.085141	0.001193	0.030728
CUST_1278_PI425129481	TS_15_A5	-0.013952	0.392087	0.940404	0.963958
CUST_1278_PI425211535	5bias_TS_15_A5	-0.112562	0.478479	0.62668	0.74862
CUST_1279_PI425129478	TG_302_L20	0.092497	0.143841	0.223843	0.471154
CUST_1279_PI425129481	TS_15_A1	-0.135054	0.55662	0.616259	0.740443
CUST_1279_PI425211535	5bias_TS_15_A1	-0.129258	0.584747	0.647022	0.762904
CUST_128_PI425129478	TG_301_G9	0.25707	0.07983	0.001971	0.036844
CUST_128_PI425129481	TS_02_D8	-0.000144	0.000322	0.373901	0.538467
CUST_128_PI425129486	Soldier_D06_T3	-0.061842	0.180947	0.48733	0.632456
CUST_128_PI425211535	5bias_TS_02_D8	0.078199	0.17526	0.37489	0.538467
CUST_128_PI425212603	5bias_TS_50_G6	-0.886536	0.344181	0.004508	0.047178
CUST_1280_PI425129478	TG_302_L16	0.250914	0.159963	0.024729	0.113718
CUST_1280_PI425129481	TS_15_B4	-0.166895	0.553972	0.537449	0.67561
CUST_1280_PI425211535	5bias_TS_15_B4	-0.131533	0.525547	0.605581	0.73197
CUST_1281_PI425129478	TG_302_L24	0.079598	0.18826	0.39797	0.55472
CUST_1281_PI425129481	TS_15_B5	-0.010127	0.298267	0.943126	0.965389
CUST_1281_PI425211535	5bias_TS_15_B5	-0.029753	0.267767	0.816011	0.883474
CUST_1282_PI425129478	TG_302_6	-0.080017	0.067482	0.056898	0.194619
CUST_1282_PI425129481	TS_15_B6	-0.731675	0.406638	0.01582	0.087068
CUST_1282_PI425211535	5bias_TS_15_B6	-0.74676	0.387018	0.012501	0.076987
CUST_1283_PI425129478	TG_302_4	0.236598	0.114836	0.009978	0.067526
CUST_1283_PI425129481	TS_15_B2	-0.000144	0.000322	0.373901	0.538467
CUST_1283_PI425211535	5bias_TS_15_B2	-0.000144	0.000322	0.373901	0.538467
CUST_1284_PI425129478	TG_302_L10	0.384249	0.132077	0.002881	0.04021
CUST_1284_PI425129481	TS_15_B3	0.046993	0.050113	0.104023	0.291003
CUST_1284_PI425211535	5bias_TS_15_B3	0.231029	0.410676	0.276847	0.533462
CUST_1285_PI425129478	TG_302_L14	0.20382	0.060445	0.001657	0.034643
CUST_1285_PI425129481	TS_15_C2	0.032071	0.16332	0.683271	0.789442
CUST_1285_PI425211535	5bias_TS_15_C2	0.11448	0.121729	0.103314	0.289731
CUST_1286_PI425129478	TG_302_L12	0.267506	0.092354	0.002929	0.04058
CUST_1286_PI425129481	TS_15_B8	0.417442	0.813384	0.315109	0.538467
CUST_1286_PI425211535	5bias_TS_15_B8	-0.000144	0.000322	0.373901	0.538467
CUST_1287_PI425129478	TG_302_L22	0.071825	0.231804	0.526525	0.666187
CUST_1287_PI425129481	TS_15_B9	0.015296	0.138658	0.817302	0.884385
CUST_1287_PI425211535	5bias_TS_15_B9	-0.008765	0.108099	0.864942	0.914191
CUST_1288_PI425129478	TG_302_L8	-0.428392	0.522887	0.140905	0.358436
CUST_1288_PI425129481	TS_15_C1	0.070261	0.091425	0.160845	0.390477
CUST_1288_PI425211535	5bias_TS_15_C1	0.035041	0.128836	0.575916	0.708023
CUST_1289_PI425129478	TG_302_L18	-0.215855	0.483079	0.374268	0.538467
CUST_1289_PI425129481	TS_15_C3	-0.469019	0.319829	0.030526	0.129804
CUST_1289_PI425211535	5bias_TS_15_C3	-0.44649	0.342992	0.043643	0.163685
CUST_129_PI425129478	TG_301_G5	-0.235441	0.184524	0.046252	0.169985
CUST_129_PI425129481	TS_02_D6	-0.269532	0.632978	0.394938	0.551959
CUST_129_PI425129486	Soldier_D07_T3	0.085206	0.461725	0.701029	0.802028
CUST_129_PI425211535	5bias_TS_02_D6	-0.287309	0.622633	0.360458	0.538467
CUST_129_PI425212603	5bias_TS_50_G2	-0.000144	0.000322	0.373901	0.538467
CUST_1290_PI425129478	TG_302_12	-0.508109	0.677301	0.168751	0.401681
CUST_1290_PI425129481	TS_15_B12	-0.709851	0.483928	0.030501	0.129804
CUST_1290_PI425211535	5bias_TS_15_B12	-0.738122	0.475703	0.025593	0.116157
CUST_1291_PI425129478	TG_302_24	0.010854	0.161358	0.88772	0.929405
CUST_1291_PI425129481	TS_15_B11	-0.300719	0.573189	0.305832	0.538467
CUST_1291_PI425211535	5bias_TS_15_B11	-0.321071	0.550179	0.261929	0.51735
CUST_1292_PI425129478	TG_302_8	-0.238214	0.35241	0.205198	0.447204
CUST_1292_PI425129481	TS_15_B10	0.064092	0.437473	0.759645	0.843894
CUST_1292_PI425211535	5bias_TS_15_B10	0.124248	0.450591	0.570872	0.704044
CUST_1293_PI425129478	TG_302_14	0.083672	0.121591	0.198701	0.438551
CUST_1293_PI425129481	TS_15_C5	0.022869	0.416947	0.908304	0.943997
CUST_1293_PI425211535	5bias_TS_15_C5	0.051032	0.338588	0.753041	0.839096
CUST_1294_PI425129478	TG_302_22	0.027947	0.119245	0.627937	0.749609
CUST_1294_PI425129481	TS_15_C4	-0.014363	0.031716	0.368503	0.538467
CUST_1294_PI425211535	5bias_TS_15_C4	-0.000144	0.000322	0.373901	0.538467
CUST_1295_PI425129478	TG_302_18	0.060235	0.066933	0.114499	0.309744
CUST_1295_PI425129481	TS_15_C7	0.032119	0.198766	0.736132	0.827321
CUST_1295_PI425211535	5bias_TS_15_C7	-0.035371	0.259893	0.776058	0.855517
CUST_1296_PI425129478	TG_302_16	0.306759	0.029715	2.1e-05	0.018393
CUST_1296_PI425129481	TS_15_C8	-0.032225	0.361127	0.851576	0.906087
CUST_1296_PI425211535	5bias_TS_15_C8	-0.036697	0.407207	0.850131	0.9051
CUST_1297_PI425129478	TG_302_20	0.004913	0.133257	0.938253	0.963031
CUST_1297_PI425129481	TS_15_C9	0.126188	0.493975	0.598419	0.726992
CUST_1297_PI425211535	5bias_TS_15_C9	-0.000144	0.000322	0.373901	0.538467
CUST_1298_PI425129478	TG_302_P12	0.135833	0.093471	0.031391	0.132297
CUST_1298_PI425129481	TS_15_C6	0.02287	0.219406	0.827143	0.890256
CUST_1298_PI425211535	5bias_TS_15_C6	0.03455	0.213525	0.735794	0.827118
CUST_1299_PI425129478	TG_302_P10	-0.000144	0.000322	0.373901	0.538467
CUST_1299_PI425129481	TS_15_C12	-1.18803	0.390069	0.002429	0.038914
CUST_1299_PI425211535	5bias_TS_15_C12	-1.0564	0.40339	0.004244	0.046127
CUST_13_PI425129478	TG_00_D10	0.239277	0.072657	0.001812	0.036087
CUST_13_PI425129481	TS_00_H11	0.045107	0.408101	0.81696	0.884187
CUST_13_PI425129486	Random_B01_T3	-0.011588	0.252535	0.923215	0.95269
CUST_13_PI425211535	5bias_TS_00_H11	0.147722	0.37105	0.423654	0.577515
CUST_13_PI425212603	5bias_TS_55_A4	-0.000687	0.438345	0.997373	0.998388
CUST_130_PI425129478	TG_301_G3	0.15701	0.119935	0.04293	0.16209
CUST_130_PI425129481	TS_02_D11	-0.845856	0.307894	0.003561	0.04324
CUST_130_PI425129486	Soldier_D08_T3	0.036285	0.215242	0.725357	0.819982
CUST_130_PI425211535	5bias_TS_02_D11	-0.91768	0.393203	0.006433	0.05465
CUST_130_PI425212603	5bias_TS_50_G9	-0.294964	0.675687	0.384271	0.542993
CUST_1300_PI425129478	TG_302_P16	0.175193	0.086888	0.010752	0.070371
CUST_1300_PI425129481	TS_15_D2	0.060458	0.34499	0.715141	0.812737
CUST_1300_PI425211535	5bias_TS_15_D2	0.095521	0.428651	0.644433	0.760935
CUST_1301_PI425129478	TG_302_P14	0.056405	0.074407	0.165305	0.396476
CUST_1301_PI425129481	TS_15_C11	-0.508356	0.144488	0.001411	0.032789
CUST_1301_PI425211535	5bias_TS_15_C11	-0.5502	0.143341	0.001012	0.028879
CUST_1302_PI425129478	TG_302_P8	0.03656	0.114338	0.51413	0.656213
CUST_1302_PI425129481	TS_15_C10	-0.069126	0.082892	0.135656	0.349714
CUST_1302_PI425211535	5bias_TS_15_C10	-0.030339	0.067839	0.373901	0.538467
CUST_1303_PI425129478	TG_303_O9	0.20333	0.068808	0.002719	0.039705
CUST_1303_PI425129481	TS_15_D3	0.169288	0.246737	0.19977	0.439802
CUST_1303_PI425211535	5bias_TS_15_D3	0.21167	0.213943	0.09139	0.267243
CUST_1304_PI425129478	TG_303_O11	0.05208	0.052965	0.092784	0.269779
CUST_1304_PI425129481	TS_15_D1	-0.416714	0.39704	0.078785	0.241838
CUST_1304_PI425211535	5bias_TS_15_D1	-0.428381	0.378246	0.064496	0.211332
CUST_1305_PI425129478	TG_303_A15	-0.02509	0.21162	0.804023	0.875008
CUST_1305_PI425129481	TS_15_D6	-0.77824	0.318208	0.005439	0.050608
CUST_1305_PI425211535	5bias_TS_15_D6	-0.757924	0.30516	0.005144	0.049687
CUST_1306_PI425129478	TG_303_O15	0.223053	0.366748	0.245447	0.498849
CUST_1306_PI425129481	TS_15_D5	-0.000144	0.000322	0.373901	0.538467
CUST_1306_PI425211535	5bias_TS_15_D5	-0.000144	0.000322	0.373901	0.538467
CUST_1307_PI425129478	TG_303_O21	0.099025	0.136719	0.180638	0.416733
CUST_1307_PI425129481	TS_15_D7	0.009971	0.195332	0.914622	0.948375
CUST_1307_PI425211535	5bias_TS_15_D7	-0.000859	0.177053	0.99186	0.995337
CUST_1308_PI425129478	TG_303_A3	0.500934	0.13571	0.001175	0.030713
CUST_1308_PI425129481	TS_15_D8	-0.000144	0.000322	0.373901	0.538467
CUST_1308_PI425211535	5bias_TS_15_D8	-0.000144	0.000322	0.373901	0.538467
CUST_1309_PI425129478	TG_303_O19	0.069845	0.133142	0.305872	0.538467
CUST_1309_PI425129481	TS_15_D10	0.02463	0.512727	0.919631	0.950209
CUST_1309_PI425211535	5bias_TS_15_D10	0.036749	0.470106	0.86973	0.917281
CUST_131_PI425129478	TG_301_I1	-0.357079	0.219652	0.02206	0.106127
CUST_131_PI425129481	TS_02_E5	-0.485148	0.263866	0.014717	0.083995
CUST_131_PI425129486	Soldier_D09_T3	-1.0845	0.7563	0.0327	0.136101
CUST_131_PI425211535	5bias_TS_02_E5	-0.402987	0.378226	0.075787	0.235872
CUST_1310_PI425129478	TG_303_A1	0.001443	0.125524	0.980719	0.988252
CUST_1310_PI425129481	TS_15_D9	0.027609	0.263328	0.826153	0.889682
CUST_1310_PI425211535	5bias_TS_15_D9	0.036813	0.294515	0.793717	0.867692
CUST_1311_PI425129478	TG_303_A11	0.236612	0.093068	0.004727	0.047827
CUST_1311_PI425129481	TS_15_D12	-0.194892	0.629055	0.526572	0.666193
CUST_1311_PI425211535	5bias_TS_15_D12	-0.241456	0.63903	0.445744	0.596485
CUST_1312_PI425129478	TG_303_A17	0.142958	0.124244	0.06179	0.205197
CUST_1312_PI425129481	TS_15_D11	0.352281	0.549669	0.22512	0.472793
CUST_1312_PI425211535	5bias_TS_15_D11	0.272489	0.425277	0.225217	0.472875
CUST_1313_PI425129478	TG_303_O13	0.186406	0.076934	0.005625	0.051481
CUST_1313_PI425129481	TS_15_E1	0.034306	0.375857	0.848242	0.904067
CUST_1313_PI425211535	5bias_TS_15_E1	0.02605	0.36341	0.880424	0.92404
CUST_1314_PI425129478	TG_303_A13	0.300596	0.088045	0.001581	0.034334
CUST_1314_PI425129481	TS_15_E2	0.007698	0.210403	0.93873	0.963394
CUST_1314_PI425211535	5bias_TS_15_E2	0.01797	0.183825	0.837669	0.897967
CUST_1315_PI425129478	TG_303_A7	0.038721	0.104332	0.453264	0.602843
CUST_1315_PI425129481	TS_15_E3	-0.30283	0.77921	0.433872	0.586029
CUST_1315_PI425211535	5bias_TS_15_E3	-0.377051	0.836542	0.370543	0.538467
CUST_1316_PI425129478	TG_303_A5	0.10545	0.091769	0.062017	0.205506
CUST_1316_PI425129481	TS_15_E4	-0.383272	0.229939	0.020347	0.100591
CUST_1316_PI425211535	5bias_TS_15_E4	-0.392654	0.152608	0.004526	0.047178
CUST_1317_PI425129478	TG_303_A9	0.100095	0.12867	0.156933	0.384121
CUST_1317_PI425129481	TS_15_E6	-0.000144	0.000322	0.373901	0.538467
CUST_1317_PI425211535	5bias_TS_15_E6	-0.000144	0.000322	0.373901	0.538467
CUST_1318_PI425129478	TG_303_O17	0.031409	0.090531	0.481189	0.626968
CUST_1318_PI425129481	TS_15_E7	0.038006	0.085387	0.375934	0.538467
CUST_1318_PI425211535	5bias_TS_15_E7	0.07428	0.166498	0.374942	0.538467
CUST_1319_PI425129478	TG_303_C9	0.132434	0.107895	0.051659	0.182077
CUST_1319_PI425129481	TS_15_E9	-0.007844	0.085759	0.847927	0.903793
CUST_1319_PI425211535	5bias_TS_15_E9	-0.163226	0.177712	0.109218	0.300218
CUST_132_PI425129478	TG_301_G13	0.219488	0.123332	0.016409	0.08879
CUST_132_PI425129481	TS_02_E3	0.028759	0.096219	0.540501	0.678471
CUST_132_PI425129486	Soldier_D10_T3	0.286682	0.078238	0.001209	0.030938
CUST_132_PI425211535	5bias_TS_02_E3	0.143866	0.154018	0.104988	0.29281
CUST_1320_PI425129478	TG_303_C15	0.129706	0.091192	0.033521	0.138418
CUST_1320_PI425129481	TS_15_E5	-0.000144	0.000322	0.373901	0.538467
CUST_1320_PI425211535	5bias_TS_15_E5	-0.037359	0.287645	0.785931	0.861994
CUST_1321_PI425129478	TG_303_A19	0.085532	0.06701	0.046201	0.169884
CUST_1321_PI425129481	TS_15_E11	0.119041	0.259017	0.362183	0.538467
CUST_1321_PI425211535	5bias_TS_15_E11	0.103111	0.271588	0.44373	0.594912
CUST_1322_PI425129478	TG_303_C1	0.028495	0.902521	0.947106	0.967586
CUST_1322_PI425129481	TS_15_E12	-0.508693	0.268305	0.013269	0.079539
CUST_1322_PI425211535	5bias_TS_15_E12	-0.501567	0.262401	0.012908	0.078447
CUST_1323_PI425129478	TG_303_C7	0.256187	0.222775	0.061885	0.205383
CUST_1323_PI425129481	TS_15_F1	-0.291286	0.540976	0.294964	0.538467
CUST_1323_PI425211535	5bias_TS_15_F1	-0.279659	0.528289	0.302069	0.538467
CUST_1324_PI425129478	TG_303_C5	0.047768	0.05475	0.122826	0.325984
CUST_1324_PI425129481	TS_15_F6	-0.128087	0.235762	0.291236	0.538467
CUST_1324_PI425211535	5bias_TS_15_F6	-0.081211	0.200701	0.416743	0.571454
CUST_1325_PI425129478	TG_303_A21	0.011996	0.083519	0.764159	0.847684
CUST_1325_PI425129481	TS_15_F4	0.173874	0.150419	0.061022	0.203558
CUST_1325_PI425211535	5bias_TS_15_F4	0.176703	0.085219	0.009759	0.066697
CUST_1326_PI425129478	TG_303_C13	0.295533	0.1143	0.004446	0.047178
CUST_1326_PI425129481	TS_15_F2	0.020743	0.046786	0.377623	0.538564
CUST_1326_PI425211535	5bias_TS_15_F2	-0.000144	0.000322	0.373901	0.538467
CUST_1327_PI425129478	TG_303_A23	-0.00251	0.126885	0.966839	0.980038
CUST_1327_PI425129481	TS_15_F3	0.054971	0.171662	0.513541	0.655767
CUST_1327_PI425211535	5bias_TS_15_F3	0.028108	0.181585	0.746683	0.835221
CUST_1328_PI425129478	TG_303_C3	0.294067	0.101434	0.002919	0.040551
CUST_1328_PI425129481	TS_15_F9	-0.072482	0.256373	0.561599	0.696316
CUST_1328_PI425211535	5bias_TS_15_F9	-0.088692	0.230714	0.438475	0.590028
CUST_1329_PI425129478	TG_303_C11	0.105407	0.144536	0.178284	0.414935
CUST_1329_PI425129481	TS_15_F11	-0.302055	0.976498	0.527195	0.666659
CUST_1329_PI425211535	5bias_TS_15_F11	0.084883	0.297974	0.558769	0.693876
CUST_133_PI425129478	TG_301_I3	0.023255	0.148323	0.743589	0.833178
CUST_133_PI425129481	TS_02_E1	-0.646311	1.36473	0.349327	0.538467
CUST_133_PI425129486	Soldier_D11_T3	-0.975513	0.703934	0.036265	0.145922
CUST_133_PI425211535	5bias_TS_02_E1	-0.66171	1.41995	0.356234	0.538467
CUST_1330_PI425129478	TG_303_C17	-1.60506	0.572338	0.003301	0.042081
CUST_1330_PI425129481	TS_15_F7	-0.281167	0.297212	0.101873	0.287083
CUST_1330_PI425211535	5bias_TS_15_F7	-0.288373	0.321825	0.115635	0.31168
CUST_1331_PI425129478	TG_303_E5	-0.014608	0.184467	0.868056	0.916006
CUST_1331_PI425129481	TS_15_F8	-0.479721	1.09573	0.383024	0.54189
CUST_1331_PI425211535	5bias_TS_15_F8	-0.530658	1.06949	0.329425	0.538467
CUST_1332_PI425129478	TG_303_C19	0.150607	0.069424	0.008334	0.061037
CUST_1332_PI425129481	TS_15_F12	0.424853	0.383746	0.068534	0.220162
CUST_1332_PI425211535	5bias_TS_15_F12	0.444915	0.363222	0.05196	0.182647
CUST_1333_PI425129478	TG_303_E7	-0.125898	0.427529	0.546205	0.683234
CUST_1333_PI425129481	TS_15_G1	-0.22461	0.720829	0.524324	0.664257
CUST_1333_PI425211535	5bias_TS_15_G1	-0.306441	0.88586	0.482392	0.628275
CUST_1334_PI425129478	TG_303_E1	0.181192	0.089452	0.010583	0.069583
CUST_1334_PI425129481	TS_15_F10	0.049538	0.111173	0.375461	0.538467
CUST_1334_PI425211535	5bias_TS_15_F10	0.025116	0.056566	0.376976	0.538467
CUST_1335_PI425129478	TG_303_C21	0.024754	0.05336	0.358173	0.538467
CUST_1335_PI425129481	TS_15_G4	0.297085	0.126607	0.00631	0.053925
CUST_1335_PI425211535	5bias_TS_15_G4	0.308401	0.131316	0.006291	0.053904
CUST_1336_PI425129478	TG_303_C23	-0.216706	0.09347	0.006587	0.055111
CUST_1336_PI425129481	TS_15_G3	0.252221	0.406864	0.237959	0.489507
CUST_1336_PI425211535	5bias_TS_15_G3	0.096131	0.214955	0.373901	0.538467
CUST_1337_PI425129478	TG_303_E11	0.352333	0.077566	0.000529	0.023134
CUST_1337_PI425129481	TS_15_G2	0.126042	0.213106	0.25654	0.511359
CUST_1337_PI425211535	5bias_TS_15_G2	0.120048	0.204318	0.259193	0.513718
CUST_1338_PI425129478	TG_303_E3	0.279593	0.118424	0.006173	0.053421
CUST_1338_PI425129481	TS_15_G8	-0.000144	0.000322	0.373901	0.538467
CUST_1338_PI425211535	5bias_TS_15_G8	-0.000144	0.000322	0.373901	0.538467
CUST_1339_PI425129478	TG_303_E9	0.057744	0.034676	0.02041	0.100841
CUST_1339_PI425129481	TS_15_G7	0.246781	0.065927	0.001114	0.02993
CUST_1339_PI425211535	5bias_TS_15_G7	0.23102	0.084236	0.003583	0.043284
CUST_134_PI425129478	TG_301_I19	-0.016276	0.074666	0.651459	0.76607
CUST_134_PI425129481	TS_02_E7	-0.165985	0.265233	0.23428	0.4846
CUST_134_PI425129486	Soldier_D12_T3	-0.97711	0.705562	0.036339	0.146144
CUST_134_PI425211535	5bias_TS_02_E7	-0.148787	0.284349	0.306945	0.538467
CUST_1340_PI425129478	TG_303_E13	0.278809	0.089165	0.002202	0.037669
CUST_1340_PI425129481	TS_15_G5	-0.000144	0.000322	0.373901	0.538467
CUST_1340_PI425211535	5bias_TS_15_G5	-0.007022	0.015701	0.373901	0.538467
CUST_1341_PI425129478	TG_303_E15	0.287195	0.088918	0.001949	0.036739
CUST_1341_PI425129481	TS_15_G6	-0.000144	0.000322	0.373901	0.538467
CUST_1341_PI425211535	5bias_TS_15_G6	0.084928	0.190307	0.374811	0.538467
CUST_1342_PI425129478	TG_303_G5	0.137652	0.043015	0.002019	0.036906
CUST_1342_PI425129481	TS_15_G9	-0.033937	0.584843	0.903024	0.940673
CUST_1342_PI425211535	5bias_TS_15_G9	-0.361534	0.82214	0.381129	0.540287
CUST_1343_PI425129478	TG_303_E21	0.150242	0.123937	0.0535	0.186481
CUST_1343_PI425129481	TS_15_G11	-0.001048	0.001965	0.299021	0.538467
CUST_1343_PI425211535	5bias_TS_15_G11	-0.019374	0.043321	0.373901	0.538467
CUST_1344_PI425129478	TG_303_E17	0.173973	0.048369	0.001297	0.03195
CUST_1344_PI425129481	TS_15_G12	-0.793501	0.148825	0.000284	0.019804
CUST_1344_PI425211535	5bias_TS_15_G12	-0.786235	0.224614	0.001438	0.032817
CUST_1345_PI425129478	TG_303_E19	-0.21784	0.425648	0.31629	0.538467
CUST_1345_PI425129481	TS_15_H1	-0.122864	0.35644	0.483845	0.629386
CUST_1345_PI425211535	5bias_TS_15_H1	-0.155964	0.415568	0.448583	0.59891
CUST_1346_PI425129478	TG_303_G1	0.09817	0.078925	0.049752	0.178108
CUST_1346_PI425129481	TS_15_H2	0.035019	0.078707	0.376107	0.538467
CUST_1346_PI425211535	5bias_TS_15_H2	-0.000144	0.000322	0.373901	0.538467
CUST_1347_PI425129478	TG_303_E23	0.320224	0.113883	0.003268	0.041975
CUST_1347_PI425129481	TS_15_H4	0.132589	0.124972	0.076625	0.237524
CUST_1347_PI425211535	5bias_TS_15_H4	0.159085	0.136627	0.059819	0.201502
CUST_1348_PI425129478	TG_303_G3	0.118657	0.135054	0.120918	0.322223
CUST_1348_PI425129481	TS_15_H3	0.111881	0.116753	0.09878	0.280313
CUST_1348_PI425211535	5bias_TS_15_H3	0.097466	0.129662	0.168088	0.400768
CUST_1349_PI425129478	TG_303_G11	0.25135	0.114993	0.008116	0.060577
CUST_1349_PI425129481	TS_15_H5	0.11484	0.156514	0.176207	0.412934
CUST_1349_PI425211535	5bias_TS_15_H5	0.102405	0.133155	0.160611	0.39021
CUST_135_PI425129478	TG_301_I23	0.047068	0.105248	0.373901	0.538467
CUST_135_PI425129481	TS_02_E2	0.103967	0.267907	0.434486	0.586556
CUST_135_PI425129486	Soldier_E01_T3	-0.818189	0.551928	0.029522	0.126803
CUST_135_PI425211535	5bias_TS_02_E2	-0.026707	0.141449	0.694591	0.797605
CUST_1350_PI425129478	TG_303_G19	0.059455	0.087542	0.203468	0.445111
CUST_1350_PI425129481	TS_15_H7	-1.11425	0.775263	0.032471	0.135435
CUST_1350_PI425211535	5bias_TS_15_H7	-1.13629	0.737805	0.026204	0.117753
CUST_1351_PI425129478	TG_303_G15	0.236889	0.135443	0.017381	0.091702
CUST_1351_PI425129481	TS_15_H8	-1.08206	0.592155	0.015024	0.084705
CUST_1351_PI425211535	5bias_TS_15_H8	-1.06269	0.46382	0.006871	0.05637
CUST_1352_PI425129478	TG_303_G7	0.462773	0.144973	0.002037	0.036992
CUST_1352_PI425129481	TS_17_H10	-0.000144	0.000322	0.373901	0.538467
CUST_1352_PI425211535	5bias_TS_17_H10	-0.000144	0.000322	0.373901	0.538467
CUST_1353_PI425129478	TG_303_G21	0.030159	0.110709	0.575333	0.70758
CUST_1353_PI425129481	TS_17_H9	-0.378876	0.787705	0.34269	0.538467
CUST_1353_PI425211535	5bias_TS_17_H9	-0.364425	0.820574	0.376891	0.538467
CUST_1354_PI425129478	TG_303_G9	0.047655	0.367305	0.786147	0.862171
CUST_1354_PI425129481	TS_17_A1	0.374401	0.596276	0.23299	0.482628
CUST_1354_PI425211535	5bias_TS_17_A1	-0.006443	0.014008	0.361835	0.538467
CUST_1355_PI425129478	TG_303_G13	0.073468	0.166583	0.379878	0.539612
CUST_1355_PI425129481	TS_17_A2	-1.25368	0.227745	0.00025	0.019804
CUST_1355_PI425211535	5bias_TS_17_A2	-1.25996	0.200055	0.000148	0.019804
CUST_1356_PI425129478	TG_303_G17	0.088463	0.198213	0.374775	0.538467
CUST_1356_PI425129481	TS_17_A4	-0.522803	0.854833	0.243255	0.496188
CUST_1356_PI425211535	5bias_TS_17_A4	-0.417024	0.815272	0.316513	0.538467
CUST_1357_PI425129478	TG_303_I3	0.004694	0.039285	0.80255	0.873829
CUST_1357_PI425129481	TS_17_A3	-0.066558	0.303606	0.649664	0.765217
CUST_1357_PI425211535	5bias_TS_17_A3	-0.071886	0.277014	0.592855	0.722133
CUST_1358_PI425129478	TG_303_I17	0.193946	0.028128	0.000103	0.019804
CUST_1358_PI425129481	TS_17_H11	-0.033717	0.229627	0.759128	0.843589
CUST_1358_PI425211535	5bias_TS_17_H11	-0.050224	0.216594	0.63147	0.752326
CUST_1359_PI425129478	TG_303_G23	0.08158	0.120195	0.203698	0.445344
CUST_1359_PI425129481	TS_17_A7	0.221288	0.279745	0.15165	0.376102
CUST_1359_PI425211535	5bias_TS_17_A7	0.154417	0.244244	0.23034	0.479537
CUST_136_PI425129478	TG_301_I7	0.232248	0.123069	0.01348	0.080315
CUST_136_PI425129481	TS_02_E8	-0.153427	0.139605	0.069882	0.222948
CUST_136_PI425129486	Soldier_E02_T3	-1.13494	0.833026	0.038159	0.150693
CUST_136_PI425211535	5bias_TS_02_E8	-0.105956	0.33668	0.520418	0.66101
CUST_1360_PI425129478	TG_303_I15	0.325244	0.077689	0.000725	0.025886
CUST_1360_PI425129481	TS_17_A6	0.153138	0.169424	0.113352	0.307846
CUST_1360_PI425211535	5bias_TS_17_A6	0.188587	0.193194	0.094455	0.27291
CUST_1361_PI425129478	TG_303_I9	0.228712	0.046385	0.000385	0.02101
CUST_1361_PI425129481	TS_17_A10	-0.024609	0.434537	0.90534	0.942088
CUST_1361_PI425211535	5bias_TS_17_A10	-0.020749	0.417678	0.916901	0.949301
CUST_1362_PI425129478	TG_303_I11	0.042215	0.569017	0.876288	0.921174
CUST_1362_PI425129481	TS_17_A5	-0.241302	0.459214	0.305172	0.538467
CUST_1362_PI425211535	5bias_TS_17_A5	-0.257299	0.566266	0.367077	0.538467
CUST_1363_PI425129478	TG_303_I5	0.049523	0.054798	0.113389	0.307894
CUST_1363_PI425129481	TS_17_A9	-0.422622	0.425569	0.090554	0.265785
CUST_1363_PI425211535	5bias_TS_17_A9	-0.38603	0.380241	0.085717	0.255933
CUST_1364_PI425129478	TG_303_I21	0.143516	0.098659	0.031294	0.132065
CUST_1364_PI425129481	TS_17_A8	0.001907	0.290577	0.988997	0.993858
CUST_1364_PI425211535	5bias_TS_17_A8	0.107397	0.224907	0.345784	0.538467
CUST_1365_PI425129478	TG_303_I23	-0.030607	0.158483	0.688112	0.793057
CUST_1365_PI425129481	TS_17_A11	-0.240136	0.172399	0.035711	0.144455
CUST_1365_PI425211535	5bias_TS_17_A11	-0.255192	0.144265	0.016742	0.089699
CUST_1366_PI425129478	TG_303_K3	-0.105577	0.240395	0.381681	0.540732
CUST_1366_PI425129481	TS_17_A12	-1.27866	0.230036	0.000241	0.019804
CUST_1366_PI425211535	5bias_TS_17_A12	-1.28144	0.21812	0.000194	0.019804
CUST_1367_PI425129478	TG_303_K5	0.052278	0.084843	0.240324	0.492634
CUST_1367_PI425129481	TS_17_B4	-0.045058	0.549296	0.863389	0.913285
CUST_1367_PI425211535	5bias_TS_17_B4	-0.102925	0.549586	0.696896	0.799143
CUST_1368_PI425129478	TG_303_K9	-0.338648	0.863016	0.429791	0.582366
CUST_1368_PI425129481	TS_17_B6	-0.113948	0.239239	0.346882	0.538467
CUST_1368_PI425211535	5bias_TS_17_B6	-0.114175	0.216198	0.303074	0.538467
CUST_1369_PI425129478	TG_303_M3	0.168397	0.275694	0.243753	0.496649
CUST_1369_PI425129481	TS_17_B3	-0.035691	0.159849	0.643804	0.760478
CUST_1369_PI425211535	5bias_TS_17_B3	-0.052441	0.150087	0.478291	0.624898
CUST_137_PI425129478	TG_301_I11	0.41437	0.077126	0.000275	0.019804
CUST_137_PI425129481	TS_02_F3	-0.425684	0.732494	0.263615	0.518889
CUST_137_PI425129486	Soldier_E03_T3	0.254124	0.169846	0.028685	0.124803
CUST_137_PI425211535	5bias_TS_02_F3	-0.347385	0.693042	0.325107	0.538467
CUST_1370_PI425129478	TG_303_K13	0.097705	0.0545	0.016014	0.087524
CUST_1370_PI425129481	TS_17_B2	-0.519919	0.170583	0.002423	0.038914
CUST_1370_PI425211535	5bias_TS_17_B2	-0.544666	0.172836	0.002138	0.037224
CUST_1371_PI425129478	TG_303_K23	0.04068	0.123154	0.501135	0.64479
CUST_1371_PI425129481	TS_17_B5	-0.342914	0.514833	0.210628	0.45375
CUST_1371_PI425211535	5bias_TS_17_B5	-0.397758	0.523347	0.164457	0.395163
CUST_1372_PI425129478	TG_303_M5	-0.005521	0.011946	0.359808	0.538467
CUST_1372_PI425129481	TS_17_C3	0.054786	0.112123	0.335963	0.538467
CUST_1372_PI425211535	5bias_TS_17_C3	-0.0391	0.197184	0.68041	0.787293
CUST_1373_PI425129478	TG_303_K17	0.153735	0.294873	0.308471	0.538467
CUST_1373_PI425129481	TS_17_B10	-0.018504	0.371838	0.916758	0.949263
CUST_1373_PI425211535	5bias_TS_17_B10	0.0408	0.379616	0.82189	0.887055
CUST_1374_PI425129478	TG_303_K21	0.185872	0.104743	0.016566	0.089196
CUST_1374_PI425129481	TS_17_B9	0.303518	0.436603	0.195043	0.433662
CUST_1374_PI425211535	5bias_TS_17_B9	0.309506	0.392358	0.152522	0.377528
CUST_1375_PI425129478	TG_303_K19	0.031396	0.042252	0.171937	0.406437
CUST_1375_PI425129481	TS_17_B12	-0.09014	0.193196	0.355717	0.538467
CUST_1375_PI425211535	5bias_TS_17_B12	-0.031572	0.078548	0.41959	0.574028
CUST_1376_PI425129478	TG_303_K11	-0.017396	0.086229	0.67529	0.783499
CUST_1376_PI425129481	TS_17_C1	0.079121	0.56542	0.769991	0.851333
CUST_1376_PI425211535	5bias_TS_17_C1	0.078038	0.111772	0.193501	0.431804
CUST_1377_PI425129478	TG_303_M13	0.342074	0.083996	0.000807	0.027303
CUST_1377_PI425129481	TS_17_B7	0.212644	0.08625	0.005283	0.05019
CUST_1377_PI425211535	5bias_TS_17_B7	0.270452	0.10849	0.005076	0.049384
CUST_1378_PI425129478	TG_303_M9	0.118445	0.391783	0.5361	0.674237
CUST_1378_PI425129481	TS_17_C2	-0.230444	0.358001	0.22346	0.47107
CUST_1378_PI425211535	5bias_TS_17_C2	-0.233398	0.351873	0.212174	0.455577
CUST_1379_PI425129478	TG_303_M19	0.108818	0.069261	0.024602	0.113346
CUST_1379_PI425129481	TS_17_B11	-0.469099	0.367153	0.046071	0.16956
CUST_1379_PI425211535	5bias_TS_17_B11	-0.454156	0.361965	0.048534	0.175346
CUST_138_PI425129478	TG_301_K11	-0.190967	0.396498	0.342114	0.538467
CUST_138_PI425129481	TS_02_E12	-0.763389	1.26267	0.247799	0.501552
CUST_138_PI425129486	Soldier_E04_T3	0.332511	0.191086	0.017676	0.092405
CUST_138_PI425211535	5bias_TS_02_E12	-0.800421	1.25861	0.228079	0.476632
CUST_1380_PI425129478	TG_303_O5	-0.073446	0.242971	0.536154	0.674251
CUST_1380_PI425129481	TS_17_B8	0.07063	0.735656	0.840514	0.899058
CUST_1380_PI425211535	5bias_TS_17_B8	0.098092	0.7024	0.770435	0.851524
CUST_1381_PI425129478	TG_303_O3	0.575495	0.775546	0.172398	0.407011
CUST_1381_PI425129481	TS_17_C4	-0.309967	0.2377	0.043422	0.163321
CUST_1381_PI425211535	5bias_TS_17_C4	-0.34732	0.200182	0.017847	0.0929
CUST_1382_PI425129478	TG_303_M15	0.026392	0.103655	0.599572	0.727701
CUST_1382_PI425129481	TS_17_C6	-0.166923	0.560008	0.54156	0.679367
CUST_1382_PI425211535	5bias_TS_17_C6	-0.15115	0.482752	0.522436	0.662515
CUST_1383_PI425129478	TG_303_M21	0.118849	0.060161	0.011534	0.073446
CUST_1383_PI425129481	TS_17_C5	-0.230058	0.349364	0.21488	0.459257
CUST_1383_PI425211535	5bias_TS_17_C5	-0.21022	0.31729	0.212597	0.456111
CUST_1384_PI425129478	TG_303_M17	-0.247561	0.306727	0.145434	0.36644
CUST_1384_PI425129481	TS_17_C10	-0.714211	1.00135	0.185968	0.422779
CUST_1384_PI425211535	5bias_TS_17_C10	-0.748149	0.994817	0.167934	0.400522
CUST_1385_PI425129478	TG_303_O7	0.114728	0.132511	0.124952	0.330621
CUST_1385_PI425129481	TS_17_C7	-0.601855	0.246608	0.00548	0.050719
CUST_1385_PI425211535	5bias_TS_17_C7	-0.516485	0.232849	0.007707	0.059181
CUST_1386_PI425129478	TG_303_M7	0.146448	0.071782	0.010324	0.06874
CUST_1386_PI425129481	TS_17_C11	0.136717	0.187971	0.1792	0.415372
CUST_1386_PI425211535	5bias_TS_17_C11	0.171391	0.166537	0.082825	0.249808
CUST_1387_PI425129478	TG_303_P19	0.136228	0.094245	0.03191	0.133801
CUST_1387_PI425129481	TS_17_C9	-0.245196	0.272488	0.114523	0.309744
CUST_1387_PI425211535	5bias_TS_17_C9	-0.229085	0.279252	0.140514	0.358019
CUST_1388_PI425129478	TG_303_B7	0.164035	0.237541	0.197438	0.436848
CUST_1388_PI425129481	TS_17_C12	-0.000144	0.000322	0.373901	0.538467
CUST_1388_PI425211535	5bias_TS_17_C12	-0.000144	0.000322	0.373901	0.538467
CUST_1389_PI425129478	TG_303_B3	0.350685	0.285956	0.051787	0.182399
CUST_1389_PI425129481	TS_17_C8	-0.118562	0.643896	0.701643	0.802423
CUST_1389_PI425211535	5bias_TS_17_C8	-0.200462	0.657753	0.532979	0.671438
CUST_139_PI425129478	TG_301_K5	0.098937	0.090355	0.070562	0.224525
CUST_139_PI425129481	TS_02_F4	-0.000144	0.000322	0.373901	0.538467
CUST_139_PI425129486	Soldier_E05_T3	0.099563	0.499315	0.67876	0.786071
CUST_139_PI425211535	5bias_TS_02_F4	-0.000144	0.000322	0.373901	0.538467
CUST_1390_PI425129478	TG_303_B1	0.237615	0.059167	0.000851	0.02734
CUST_1390_PI425129481	TS_17_D6	0.040462	0.09088	0.375811	0.538467
CUST_1390_PI425211535	5bias_TS_17_D6	-0.000144	0.000322	0.373901	0.538467
CUST_1391_PI425129478	TG_303_B5	-0.08376	0.222351	0.44702	0.597888
CUST_1391_PI425129481	TS_17_D1	-0.110245	0.170772	0.222354	0.469179
CUST_1391_PI425211535	5bias_TS_17_D1	-0.08264	0.107561	0.16093	0.390625
CUST_1392_PI425129478	TG_303_B11	0.032495	0.106658	0.533108	0.671547
CUST_1392_PI425129481	TS_17_D3	-0.147783	0.538707	0.572766	0.70547
CUST_1392_PI425211535	5bias_TS_17_D3	-0.112619	0.584384	0.688731	0.79348
CUST_1393_PI425129478	TG_303_B17	0.138699	0.047873	0.002926	0.040578
CUST_1393_PI425129481	TS_17_D4	-0.079229	0.580869	0.775582	0.855288
CUST_1393_PI425211535	5bias_TS_17_D4	-0.069702	0.583191	0.802488	0.873822
CUST_1394_PI425129478	TG_303_B19	-0.062181	0.274323	0.638922	0.757324
CUST_1394_PI425129481	TS_17_D2	-0.141133	0.225337	0.233964	0.484136
CUST_1394_PI425211535	5bias_TS_17_D2	-0.12669	0.21769	0.263036	0.518399
CUST_1395_PI425129478	TG_303_B15	0.149153	0.151404	0.092361	0.268959
CUST_1395_PI425129481	TS_17_D5	0.022681	0.142982	0.74072	0.831171
CUST_1395_PI425211535	5bias_TS_17_D5	-0.002965	0.192054	0.974116	0.984102
CUST_1396_PI425129478	TG_303_B9	0.054283	0.072109	0.167608	0.400068
CUST_1396_PI425129481	TS_17_D8	-0.000144	0.000322	0.373901	0.538467
CUST_1396_PI425211535	5bias_TS_17_D8	0.103577	0.144894	0.185189	0.42199
CUST_1397_PI425129478	TG_303_B21	-0.000144	0.000322	0.373901	0.538467
CUST_1397_PI425129481	TS_17_D11	0.030623	0.57382	0.910767	0.945422
CUST_1397_PI425211535	5bias_TS_17_D11	0.047159	0.608154	0.870761	0.917938
CUST_1398_PI425129478	TG_303_D3	-0.687199	0.520248	0.041818	0.159422
CUST_1398_PI425129481	TS_17_D12	0.085371	0.371626	0.634551	0.754416
CUST_1398_PI425211535	5bias_TS_17_D12	0.110347	0.413593	0.582909	0.71433
CUST_1399_PI425129478	TG_303_D11	-0.064107	0.090153	0.187029	0.423845
CUST_1399_PI425129481	TS_17_D10	0.005111	0.151723	0.943578	0.965663
CUST_1399_PI425211535	5bias_TS_17_D10	0.000796	0.20695	0.993548	0.996382
CUST_14_PI425129478	TG_00_A7	0.280958	0.04718	0.000184	0.019804
CUST_14_PI425129481	TS_00_A5	-0.000144	0.000322	0.373901	0.538467
CUST_14_PI425129486	Random_B02_T3	0.169404	0.05139	0.001805	0.03606
CUST_14_PI425211535	5bias_TS_00_A5	-0.01317	0.029049	0.368013	0.538467
CUST_14_PI425212603	5bias_TS_55_A1	-0.249124	0.476564	0.30735	0.538467
CUST_140_PI425129478	TG_301_K7	0.185063	0.073087	0.004797	0.048157
CUST_140_PI425129481	TS_02_F1	0.056652	0.223365	0.600937	0.728595
CUST_140_PI425129486	Soldier_E07_T3	0.139731	0.1267	0.069241	0.221529
CUST_140_PI425211535	5bias_TS_02_F1	0.0559	0.250702	0.644239	0.760836
CUST_1400_PI425129478	TG_303_D13	-0.106382	0.104326	0.084773	0.254148
CUST_1400_PI425129481	TS_17_E1	-0.112795	0.404084	0.566349	0.700636
CUST_1400_PI425211535	5bias_TS_17_E1	-0.108518	0.379878	0.557715	0.692961
CUST_1401_PI425129478	TG_303_D9	0.026887	0.059755	0.371282	0.538467
CUST_1401_PI425129481	TS_17_E5	0.408699	0.750246	0.290119	0.538467
CUST_1401_PI425211535	5bias_TS_17_E5	-0.000144	0.000322	0.373901	0.538467
CUST_1402_PI425129478	TG_303_D1	-0.060946	0.135877	0.372631	0.538467
CUST_1402_PI425129481	TS_17_E6	-0.431972	0.372959	0.060692	0.203257
CUST_1402_PI425211535	5bias_TS_17_E6	-0.443535	0.350366	0.047312	0.172634
CUST_1403_PI425129478	TG_303_B23	0.386993	0.098711	0.000933	0.028257
CUST_1403_PI425129481	TS_17_E7	0.039504	0.121379	0.507082	0.649995
CUST_1403_PI425211535	5bias_TS_17_E7	-0.019462	0.091421	0.658891	0.771467
CUST_1404_PI425129478	TG_303_D7	0.401317	0.08049	0.000368	0.020621
CUST_1404_PI425129481	TS_17_E4	0.233904	0.225715	0.081387	0.247033
CUST_1404_PI425211535	5bias_TS_17_E4	0.065938	0.147442	0.373901	0.538467
CUST_1405_PI425129478	TG_303_F1	0.066686	0.087952	0.165241	0.396476
CUST_1405_PI425129481	TS_17_E2	0.037613	0.376279	0.834084	0.895351
CUST_1405_PI425211535	5bias_TS_17_E2	-0.030232	0.391714	0.871362	0.918264
CUST_1406_PI425129478	TG_303_F3	0.073979	0.092679	0.148831	0.372445
CUST_1406_PI425129481	TS_17_E8	0.079678	0.183243	0.385962	0.54415
CUST_1406_PI425211535	5bias_TS_17_E8	0.058855	0.185566	0.517352	0.658657
CUST_1407_PI425129478	TG_303_D17	0.101269	0.11147	0.112027	0.305566
CUST_1407_PI425129481	TS_17_E3	-0.521647	0.239855	0.008261	0.060908
CUST_1407_PI425211535	5bias_TS_17_E3	-0.463402	0.385386	0.05473	0.189158
CUST_1408_PI425129478	TG_303_D19	0.129271	0.096409	0.040011	0.155141
CUST_1408_PI425129481	TS_17_E11	-0.003441	0.007299	0.351225	0.538467
CUST_1408_PI425211535	5bias_TS_17_E11	-0.000144	0.000322	0.373901	0.538467
CUST_1409_PI425129478	TG_303_D23	-0.131261	0.143426	0.110137	0.30198
CUST_1409_PI425129481	TS_17_E9	-0.000144	0.000322	0.373901	0.538467
CUST_1409_PI425211535	5bias_TS_17_E9	-0.000144	0.000322	0.373901	0.538467
CUST_141_PI425129478	TG_301_K17	-0.601254	1.08862	0.284415	0.538467
CUST_141_PI425129481	TS_02_E11	0.080815	0.180708	0.373901	0.538467
CUST_141_PI425129486	Soldier_E11_T3	-0.427171	1.08975	0.430234	0.582866
CUST_141_PI425211535	5bias_TS_02_E11	0.097818	0.218729	0.373901	0.538467
CUST_1410_PI425129478	TG_303_D21	0.201859	0.267065	0.166271	0.397822
CUST_1410_PI425129481	TS_17_E10	-0.77751	0.375654	0.009821	0.066866
CUST_1410_PI425211535	5bias_TS_17_E10	-0.767914	0.360479	0.008883	0.063299
CUST_1411_PI425129478	TG_303_D15	-0.09523	0.186883	0.318125	0.538467
CUST_1411_PI425129481	TS_17_F2	-0.140767	0.30076	0.354371	0.538467
CUST_1411_PI425211535	5bias_TS_17_F2	-0.156678	0.270093	0.264349	0.51966
CUST_1412_PI425129478	TG_303_F11	0.0935	0.077504	0.05423	0.187736
CUST_1412_PI425129481	TS_17_E12	-0.073252	0.248195	0.54535	0.682535
CUST_1412_PI425211535	5bias_TS_17_E12	-0.041491	0.285572	0.761555	0.845391
CUST_1413_PI425129478	TG_303_F17	0.319838	0.051992	0.000162	0.019804
CUST_1413_PI425129481	TS_17_F1	0.15623	0.10386	0.028211	0.12335
CUST_1413_PI425211535	5bias_TS_17_F1	0.137392	0.131178	0.079206	0.242651
CUST_1414_PI425129478	TG_303_F19	-0.650321	0.418733	0.025519	0.115997
CUST_1414_PI425129481	TS_17_F4	0.090398	0.16808	0.29544	0.538467
CUST_1414_PI425211535	5bias_TS_17_F4	0.067686	0.164224	0.408889	0.564102
CUST_1415_PI425129478	TG_303_F15	-0.070986	0.085116	0.135636	0.349714
CUST_1415_PI425129481	TS_17_F7	-0.053575	0.119797	0.373901	0.538467
CUST_1415_PI425211535	5bias_TS_17_F7	0.058262	0.130681	0.375228	0.538467
CUST_1416_PI425129478	TG_303_F7	-0.268541	0.225272	0.056064	0.192604
CUST_1416_PI425129481	TS_17_F5	-0.000144	0.000322	0.373901	0.538467
CUST_1416_PI425211535	5bias_TS_17_F5	0.049319	0.110684	0.375468	0.538467
CUST_1417_PI425129478	TG_303_F13	-0.252275	0.1804	0.035289	0.143312
CUST_1417_PI425129481	TS_17_F6	-0.101897	0.102257	0.089792	0.263993
CUST_1417_PI425211535	5bias_TS_17_F6	-0.07557	0.115096	0.215975	0.461033
CUST_1418_PI425129478	TG_303_F21	0.139723	0.105493	0.041488	0.15878
CUST_1418_PI425129481	TS_17_F3	0.029154	0.634908	0.923161	0.95269
CUST_1418_PI425211535	5bias_TS_17_F3	0.030127	0.541086	0.906925	0.943265
CUST_1419_PI425129478	TG_303_F9	0.116176	0.128943	0.11419	0.309322
CUST_1419_PI425129481	TS_17_F9	-0.813582	0.63772	0.046269	0.169995
CUST_1419_PI425211535	5bias_TS_17_F9	-0.875293	0.678857	0.044873	0.166667
CUST_142_PI425129478	TG_301_I15	-0.098027	0.319904	0.53087	0.669585
CUST_142_PI425129481	TS_02_E10	-0.733472	0.300027	0.005447	0.050608
CUST_142_PI425129486	Soldier_E12_T3	0.372216	0.068038	0.000256	0.019804
CUST_142_PI425211535	5bias_TS_02_E10	-0.727369	0.321909	0.007218	0.0575
CUST_1420_PI425129478	TG_303_H9	-1.08918	0.394452	0.003495	0.042973
CUST_1420_PI425129481	TS_17_F10	0.150797	0.198188	0.16409	0.394979
CUST_1420_PI425211535	5bias_TS_17_F10	0.303521	0.085883	0.001387	0.032789
CUST_1421_PI425129478	TG_303_H1	0.003367	0.308307	0.98169	0.989021
CUST_1421_PI425129481	TS_17_F11	-0.258143	0.398628	0.221176	0.467697
CUST_1421_PI425211535	5bias_TS_17_F11	-0.130658	0.413555	0.518878	0.659907
CUST_1422_PI425129478	TG_303_F23	0.3595	0.117903	0.002419	0.038914
CUST_1422_PI425129481	TS_17_F8	0.027918	0.19859	0.768972	0.850565
CUST_1422_PI425211535	5bias_TS_17_F8	0.000462	0.230556	0.996638	0.997843
CUST_1423_PI425129478	TG_303_H5	0.126254	0.040309	0.002188	0.037597
CUST_1423_PI425129481	TS_17_G3	0.057435	0.318268	0.707204	0.806727
CUST_1423_PI425211535	5bias_TS_17_G3	0.056899	0.267225	0.65883	0.771453
CUST_1424_PI425129478	TG_303_H7	-0.288635	0.373363	0.158936	0.387518
CUST_1424_PI425129481	TS_17_G1	-0.239398	0.38191	0.23364	0.483721
CUST_1424_PI425211535	5bias_TS_17_G1	-0.085977	0.106196	0.144491	0.364903
CUST_1425_PI425129478	TG_303_H21	0.276695	0.062912	0.000599	0.02371
CUST_1425_PI425129481	TS_17_F12	0.121356	0.386738	0.521565	0.661796
CUST_1425_PI425211535	5bias_TS_17_F12	0.169488	0.421129	0.419039	0.573473
CUST_1426_PI425129478	TG_303_H19	0.099607	0.057819	0.018269	0.094206
CUST_1426_PI425129481	TS_17_G2	-0.000144	0.000322	0.373901	0.538467
CUST_1426_PI425211535	5bias_TS_17_G2	-0.000144	0.000322	0.373901	0.538467
CUST_1427_PI425129478	TG_303_H17	0.23245	0.152286	0.026949	0.1199
CUST_1427_PI425129481	TS_17_G4	-0.639035	0.989362	0.222158	0.468906
CUST_1427_PI425211535	5bias_TS_17_G4	-0.683838	1.03666	0.214229	0.45836
CUST_1428_PI425129478	TG_303_H23	-0.859014	0.953312	0.114161	0.309297
CUST_1428_PI425129481	TS_17_G10	0.218298	0.194597	0.06617	0.215426
CUST_1428_PI425211535	5bias_TS_17_G10	0.138796	0.249699	0.281776	0.538467
CUST_1429_PI425129478	TG_303_H15	-0.358229	0.483638	0.173013	0.408068
CUST_1429_PI425129481	TS_17_G9	0.076147	0.391295	0.685906	0.791326
CUST_1429_PI425211535	5bias_TS_17_G9	-0.003617	0.445501	0.986387	0.992122
CUST_143_PI425129478	TG_301_I13	0.219645	0.066936	0.001837	0.036343
CUST_143_PI425129481	TS_02_F2	-1.15453	0.637491	0.01548	0.086014
CUST_143_PI425129486	Soldier_F01_T3	0.316201	0.172458	0.014855	0.084357
CUST_143_PI425211535	5bias_TS_02_F2	-1.23871	0.671921	0.014585	0.083547
CUST_1430_PI425129478	TG_303_J9	0.11646	0.475543	0.613083	0.737891
CUST_1430_PI425129481	TS_17_G8	-0.261108	0.276692	0.102476	0.288048
CUST_1430_PI425211535	5bias_TS_17_G8	-0.249349	0.264906	0.103099	0.289335
CUST_1431_PI425129478	TG_303_J11	0.186412	0.111332	0.020051	0.099847
CUST_1431_PI425129481	TS_17_G6	-0.001105	0.435106	0.99574	0.997631
CUST_1431_PI425211535	5bias_TS_17_G6	0.022058	0.38307	0.903764	0.941229
CUST_1432_PI425129478	TG_303_L5	0.415502	0.111813	0.001146	0.030259
CUST_1432_PI425129481	TS_17_G5	-0.103813	0.181291	0.269598	0.525086
CUST_1432_PI425211535	5bias_TS_17_G5	-0.22376	0.243177	0.108757	0.299815
CUST_1433_PI425129478	TG_303_J23	0.253504	0.105468	0.005789	0.052078
CUST_1433_PI425129481	TS_17_G7	-0.075795	0.259413	0.54919	0.685987
CUST_1433_PI425211535	5bias_TS_17_G7	-0.103397	0.246405	0.401214	0.557365
CUST_1434_PI425129478	TG_303_J21	0.032614	0.069186	0.351308	0.538467
CUST_1434_PI425129481	TS_17_H1	-0.591204	0.247133	0.005889	0.05213
CUST_1434_PI425211535	5bias_TS_17_H1	-0.613291	0.256192	0.005874	0.05213
CUST_1435_PI425129478	TG_303_L1	-0.000144	0.000322	0.373901	0.538467
CUST_1435_PI425129481	TS_17_H3	0.280529	0.351774	0.149128	0.372726
CUST_1435_PI425211535	5bias_TS_17_H3	0.122272	0.613292	0.678805	0.786071
CUST_1436_PI425129478	TG_303_L17	0.133354	0.061803	0.008493	0.061414
CUST_1436_PI425129481	TS_17_G12	-0.616344	1.18069	0.307936	0.538467
CUST_1436_PI425211535	5bias_TS_17_G12	-0.544457	1.1167	0.336894	0.538467
CUST_1437_PI425129478	TG_303_L15	-0.723011	0.96631	0.16963	0.40304
CUST_1437_PI425129481	TS_17_H4	0.110225	0.163509	0.206195	0.447988
CUST_1437_PI425211535	5bias_TS_17_H4	0.083038	0.151884	0.288623	0.538467
CUST_1438_PI425129478	TG_303_L23	0.141219	0.309737	0.365613	0.538467
CUST_1438_PI425129481	TS_17_H2	0.07686	0.496959	0.746892	0.835239
CUST_1438_PI425211535	5bias_TS_17_H2	0.080962	0.459384	0.713625	0.811822
CUST_1439_PI425129478	TG_303_L19	-0.823551	0.597293	0.03682	0.147138
CUST_1439_PI425129481	TS_17_H7	-2.14577	0.662303	0.001927	0.036739
CUST_1439_PI425211535	5bias_TS_17_H7	-2.12779	0.670218	0.00208	0.037032
CUST_144_PI425129478	TG_301_K3	0.063388	0.197777	0.513199	0.655437
CUST_144_PI425129481	TS_02_F5	0.169146	0.236316	0.184742	0.421391
CUST_144_PI425129486	Soldier_F02_T3	-0.040671	0.119956	0.490584	0.63537
CUST_144_PI425211535	5bias_TS_02_F5	0.128259	0.247354	0.310768	0.538467
CUST_1440_PI425129478	TG_303_L13	0.023058	0.114457	0.675706	0.783521
CUST_1440_PI425129481	TS_17_H6	-0.464863	0.228168	0.010373	0.068864
CUST_1440_PI425211535	5bias_TS_17_H6	-0.432758	0.288347	0.028412	0.123988
CUST_1441_PI425129478	TG_303_L21	0.023949	0.104342	0.634839	0.75453
CUST_1441_PI425129481	TS_17_H5	-0.376377	0.837028	0.37156	0.538467
CUST_1441_PI425211535	5bias_TS_17_H5	-0.368521	0.700489	0.304673	0.538467
CUST_1442_PI425129478	TG_303_13	0.452466	0.068724	0.000124	0.019804
CUST_1442_PI425129481	TS_17_G11	-0.000144	0.000322	0.373901	0.538467
CUST_1442_PI425211535	5bias_TS_17_G11	-0.061816	0.152155	0.415027	0.569866
CUST_1443_PI425129478	TG_303_11	0.051986	0.061966	0.13391	0.346975
CUST_1443_PI425129481	TS_17_H8	-0.511935	0.175356	0.002844	0.040118
CUST_1443_PI425211535	5bias_TS_17_H8	-0.618408	0.241881	0.004632	0.047312
CUST_1444_PI425129478	TG_303_5	0.051224	0.237772	0.655171	0.76849
CUST_1444_PI425129481	TS_19_H3	-0.031495	0.414778	0.873418	0.91963
CUST_1444_PI425211535	5bias_TS_19_H3	0.218264	0.344306	0.229307	0.478146
CUST_1445_PI425129478	TG_303_7	0.115155	0.049689	0.006597	0.055111
CUST_1445_PI425129481	TS_19_H4	0.138714	0.345762	0.420392	0.574589
CUST_1445_PI425211535	5bias_TS_19_H4	0.1455	0.218947	0.21148	0.454458
CUST_1446_PI425129478	TG_303_15	0.162234	0.126066	0.045122	0.167192
CUST_1446_PI425129481	TS_19_H8	-0.321881	0.403879	0.149321	0.37303
CUST_1446_PI425211535	5bias_TS_19_H8	-0.472119	0.420132	0.065863	0.214793
CUST_1447_PI425129478	TG_303_9	0.017149	0.069446	0.610229	0.73578
CUST_1447_PI425129481	TS_19_H7	-0.170534	0.476345	0.468256	0.616599
CUST_1447_PI425211535	5bias_TS_19_H7	-0.137101	0.414577	0.500667	0.6444
CUST_1448_PI425129478	TG_303_17	-0.356407	0.232913	0.026739	0.119304
CUST_1448_PI425129481	TS_19_H10	0.109655	0.379117	0.553029	0.689032
CUST_1448_PI425211535	5bias_TS_19_H10	0.088085	0.388578	0.638901	0.757324
CUST_1449_PI425129478	TG_303_19	0.313865	0.078033	0.000846	0.02734
CUST_1449_PI425129481	TS_19_H9	0.020461	0.045752	0.373901	0.538467
CUST_1449_PI425211535	5bias_TS_19_H9	0.041351	0.153891	0.580339	0.712234
CUST_145_PI425129478	TG_301_K15	0.03853	0.041889	0.108849	0.299858
CUST_145_PI425129481	TS_02_F6	0.018951	0.047848	0.42584	0.579306
CUST_145_PI425129486	Soldier_F04_T3	-0.852721	0.580766	0.030411	0.129482
CUST_145_PI425211535	5bias_TS_02_F6	0.009895	0.073536	0.778487	0.857355
CUST_1450_PI425129478	TG_303_P3	-0.006083	0.238608	0.957276	0.973872
CUST_1450_PI425129481	TS_19_H12	0.075929	0.19653	0.436368	0.587937
CUST_1450_PI425211535	5bias_TS_19_H12	0.003689	0.153875	0.95982	0.975688
CUST_1451_PI425129478	TG_303_P5	0.284222	0.214199	0.041265	0.158357
CUST_1451_PI425129481	TS_19_H11	-0.000144	0.000322	0.373901	0.538467
CUST_1451_PI425211535	5bias_TS_19_H11	-0.000144	0.000322	0.373901	0.538467
CUST_1452_PI425129478	TG_303_P7	0.028901	0.051626	0.278854	0.536214
CUST_1452_PI425129481	TS_19_H6	0.073959	0.250343	0.544971	0.682178
CUST_1452_PI425211535	5bias_TS_19_H6	0.030801	0.298742	0.82898	0.891506
CUST_1453_PI425129478	TG_303_23	-0.011889	0.456044	0.956309	0.97325
CUST_1453_PI425129481	TS_19_A1	0.025209	0.067642	0.451515	0.601345
CUST_1453_PI425211535	5bias_TS_19_A1	0.041176	0.092073	0.373901	0.538467
CUST_1454_PI425129478	TG_303_P11	0.27289	0.041443	0.000124	0.019804
CUST_1454_PI425129481	TS_19_A5	-0.580276	0.266308	0.008206	0.060786
CUST_1454_PI425211535	5bias_TS_19_A5	-0.694221	0.400914	0.017963	0.093229
CUST_1455_PI425129478	TG_303_P9	0.298607	0.364467	0.140899	0.358436
CUST_1455_PI425129481	TS_19_A4	-0.511739	0.805791	0.22861	0.477162
CUST_1455_PI425211535	5bias_TS_19_A4	-0.439095	0.766712	0.26955	0.525056
CUST_1456_PI425129478	TG_303_21	-0.470048	0.114469	0.000781	0.02672
CUST_1456_PI425129481	TS_19_A2	-0.000144	0.000322	0.373901	0.538467
CUST_1456_PI425211535	5bias_TS_19_A2	-0.000144	0.000322	0.373901	0.538467
CUST_1457_PI425129478	TG_303_P13	0.046748	0.160791	0.551067	0.687404
CUST_1457_PI425129481	TS_19_A6	-0.175727	0.261729	0.207677	0.449975
CUST_1457_PI425211535	5bias_TS_19_A6	-0.197313	0.282551	0.193431	0.431763
CUST_1458_PI425129478	TG_303_P17	-0.030521	0.100026	0.532515	0.671143
CUST_1458_PI425129481	TS_19_A7	-0.155266	0.510021	0.533408	0.671872
CUST_1458_PI425211535	5bias_TS_19_A7	-0.094232	0.690645	0.775513	0.855276
CUST_1459_PI425129478	TG_303_O12	0.126644	0.070292	0.015751	0.086777
CUST_1459_PI425129481	TS_19_A9	-0.053086	0.247337	0.656344	0.769466
CUST_1459_PI425211535	5bias_TS_19_A9	-0.112676	0.377094	0.540621	0.678492
CUST_146_PI425129478	TG_301_I9	0.058761	0.131393	0.373901	0.538467
CUST_146_PI425129481	TS_02_F7	-1.48737	0.457413	0.001901	0.036619
CUST_146_PI425129486	Soldier_F05_T3	-0.972069	0.705358	0.036875	0.14721
CUST_146_PI425211535	5bias_TS_02_F7	-1.69189	0.471513	0.001309	0.03205
CUST_1460_PI425129478	TG_303_O14	0.081598	0.109576	0.171217	0.405099
CUST_1460_PI425129481	TS_19_A8	-0.52368	0.248275	0.009195	0.064453
CUST_1460_PI425211535	5bias_TS_19_A8	-0.593065	0.339283	0.017414	0.091706
CUST_1461_PI425129478	TG_303_A8	0.057512	0.034042	0.019475	0.098005
CUST_1461_PI425129481	TS_19_A10	0.312752	0.230232	0.038495	0.151488
CUST_1461_PI425211535	5bias_TS_19_A10	0.254194	0.190506	0.040594	0.156687
CUST_1462_PI425129478	TG_303_A2	0.284831	0.091137	0.002206	0.0377
CUST_1462_PI425129481	TS_19_B4	-0.303766	0.42196	0.182743	0.418713
CUST_1462_PI425211535	5bias_TS_19_B4	-0.278198	0.431307	0.222683	0.469731
CUST_1463_PI425129478	TG_303_A12	-0.000144	0.000322	0.373901	0.538467
CUST_1463_PI425129481	TS_19_B3	-0.04449	0.26929	0.730539	0.823209
CUST_1463_PI425211535	5bias_TS_19_B3	-0.054846	0.265295	0.667911	0.777805
CUST_1464_PI425129478	TG_303_A6	0.200073	0.070487	0.003157	0.041686
CUST_1464_PI425129481	TS_19_B1	-0.296719	0.665458	0.375177	0.538467
CUST_1464_PI425211535	5bias_TS_19_B1	-0.402807	0.864772	0.356431	0.538467
CUST_1465_PI425129478	TG_303_A14	0.055078	0.104755	0.304926	0.538467
CUST_1465_PI425129481	TS_19_A12	-0.83953	0.639873	0.042653	0.161394
CUST_1465_PI425211535	5bias_TS_19_A12	-0.868292	0.630937	0.03703	0.14761
CUST_1466_PI425129478	TG_303_O20	0.049428	0.081423	0.246187	0.499758
CUST_1466_PI425129481	TS_19_B2	-0.281464	0.403138	0.193504	0.431804
CUST_1466_PI425211535	5bias_TS_19_B2	-0.265205	0.369626	0.1839	0.420202
CUST_1467_PI425129478	TG_303_A10	0.259096	0.128809	0.010841	0.07072
CUST_1467_PI425129481	TS_19_B6	-0.107475	0.300816	0.469096	0.617188
CUST_1467_PI425211535	5bias_TS_19_B6	-0.0948	0.294258	0.511139	0.653443
CUST_1468_PI425129478	TG_303_O24	0.157291	0.357536	0.380952	0.540279
CUST_1468_PI425129481	TS_19_A11	0.153883	0.264556	0.263252	0.518629
CUST_1468_PI425211535	5bias_TS_19_A11	0.125652	0.233587	0.295367	0.538467
CUST_1469_PI425129478	TG_303_O16	0.05696	0.08509	0.208776	0.451545
CUST_1469_PI425129481	TS_19_B9	0.266937	0.093143	0.003046	0.041113
CUST_1469_PI425211535	5bias_TS_19_B9	0.283239	0.057098	0.000376	0.020682
CUST_147_PI425129478	TG_301_K9	0.023981	0.237695	0.832575	0.894477
CUST_147_PI425129481	TS_02_F9	-0.058464	0.094468	0.238614	0.490646
CUST_147_PI425129486	Soldier_F06_T3	-0.078412	0.228319	0.485349	0.630779
CUST_147_PI425211535	5bias_TS_02_F9	0.001139	0.090438	0.978891	0.986916
CUST_1470_PI425129478	TG_303_O18	-0.051799	0.112252	0.360446	0.538467
CUST_1470_PI425129481	TS_19_B7	-0.006203	0.440358	0.97638	0.985331
CUST_1470_PI425211535	5bias_TS_19_B7	0.067709	0.569738	0.803574	0.874581
CUST_1471_PI425129478	TG_303_A24	-0.78425	0.376248	0.009583	0.065907
CUST_1471_PI425129481	TS_19_B8	-1.67975	1.07237	0.024839	0.114056
CUST_1471_PI425211535	5bias_TS_19_B8	-1.64102	1.09371	0.028435	0.124024
CUST_1472_PI425129478	TG_303_C10	0.092303	0.060856	0.027491	0.121594
CUST_1472_PI425129481	TS_19_B10	-0.021727	0.048583	0.373901	0.538467
CUST_1472_PI425211535	5bias_TS_19_B10	0.259221	0.720211	0.466041	0.614658
CUST_1473_PI425129478	TG_303_C2	-0.089285	0.106906	0.135222	0.349112
CUST_1473_PI425129481	TS_19_B11	-0.000144	0.000322	0.373901	0.538467
CUST_1473_PI425211535	5bias_TS_19_B11	-0.000144	0.000322	0.373901	0.538467
CUST_1474_PI425129478	TG_303_C4	0.195465	0.075839	0.004498	0.047178
CUST_1474_PI425129481	TS_19_B12	0.000709	0.163589	0.992732	0.995769
CUST_1474_PI425211535	5bias_TS_19_B12	-0.025147	0.159963	0.742934	0.832766
CUST_1475_PI425129478	TG_303_A16	0.129149	0.176132	0.17643	0.413211
CUST_1475_PI425129481	TS_19_C1	-0.000144	0.000322	0.373901	0.538467
CUST_1475_PI425211535	5bias_TS_19_C1	0.08744	0.158717	0.285457	0.538467
CUST_1476_PI425129478	TG_303_A22	-0.00477	0.076598	0.895981	0.935299
CUST_1476_PI425129481	TS_19_C4	-0.024598	0.115062	0.657588	0.770515
CUST_1476_PI425211535	5bias_TS_19_C4	-0.000144	0.000322	0.373901	0.538467
CUST_1477_PI425129478	TG_303_A20	0.493876	0.070208	9.5e-05	0.019804
CUST_1477_PI425129481	TS_19_C3	-0.457666	0.344374	0.041076	0.158009
CUST_1477_PI425211535	5bias_TS_19_C3	-0.311059	0.26934	0.061171	0.203872
CUST_1478_PI425129478	TG_303_A18	-0.076866	0.232402	0.500614	0.6444
CUST_1478_PI425129481	TS_19_C5	-0.136059	0.034586	0.000921	0.028105
CUST_1478_PI425211535	5bias_TS_19_C5	-0.153727	0.228086	0.206267	0.448026
CUST_1479_PI425129478	TG_303_C6	0.417915	0.098879	0.000699	0.025356
CUST_1479_PI425129481	TS_19_C2	0.158481	0.159908	0.091005	0.266513
CUST_1479_PI425211535	5bias_TS_19_C2	0.195295	0.184172	0.076728	0.237797
CUST_148_PI425129478	TG_301_M9	0.168073	0.060882	0.003498	0.042973
CUST_148_PI425129481	TS_02_F8	-0.633563	0.847004	0.169724	0.403102
[truncated: 13,742 more rows]
